# Supplementary material for: Evaluation of Differentially Expressed Genes in Leaves vs. Roots Subjected to Drought Stress in Flax (Linum usitatissimum L.)
Source: Int J Mol Sci. 2023 Jul 27;24(15):12019. doi: 10.3390/ijms241512019 (PMC10419004; doi:10.3390/ijms241512019)
Supplement: Supplementary file 1 [file ijms-24-12019-s001.zip]

Archive with 11 entries (11 files):
- Figure S1.tif
- Figure S2.tif
- Figure S3.TIF
- supplementary materials captions.pdf
- Supplementary Table S1.xlsx
- Supplementary Table S2.xlsx
- Supplementary Table S3.xlsx
- Supplementary Table S4.xlsx
- Supplementary Table S5.xlsx
- Supplementary Table S6.xlsx
- Supplementary Table S7.xlsx
