# Supplementary material for: Evaluation of Differentially Expressed Genes in Leaves vs. Roots Subjected to Drought Stress in Flax (Linum usitatissimum L.)
Source: Int J Mol Sci. 2023 Jul 27;24(15):12019. doi: 10.3390/ijms241512019 (PMC10419004; doi:10.3390/ijms241512019)
Supplement: Supplementary file 1 [file ijms-24-12019-s001.zip › Supplementary Table S1.xlsx]

## Sheet: Sheet1
Data quality control
sample	Raw reads	Clean reads	GC(%)	Q30(%)
M−Fn−L1	49784734	48704178	49.4	93.2
M−Fn−L2	49502804	48348140	49.2	92.5
M−Fn−L3	41179224	40065568	48.5	93.5
D−Fn−L1	60815910	58385534	49.4	94.4
D−Fn−L2	57911236	55528540	49.1	92.9
D−Fn−L3	57924484	55701596	49.1	93.6
M−Fn−R1	50854438	48373440	49	93.6
M−Fn−R2	49518014	47033544	48.8	93.5
M−Fn−R3	57185228	54406780	48.9	93.5
D−Fn−R1	66159256	63116486	48.6	93.4
D−Fn−R2	56724292	54049354	48.8	93.6
D−Fn−R3	59451838	56837482	49	93.3
M−Ly−L1	54833592	53563216	48.9	92.5
M−Ly−L2	52483686	51083342	49.3	93
M−Ly−L3	53231952	51817762	49	93.4
D−Ly−L1	48580082	47214098	49.3	93.4
D−Ly−L2	47625078	45630084	49.2	93.4
D−Ly−L3	54213706	52389620	49.6	93.1
M−Ly−R1	51362216	50294794	48.8	93
M−Ly−R2	49227350	47801216	49	93.3
M−Ly−R3	55422096	53864674	48.8	93.1
D−Ly−R1	53833672	49778906	48.6	93.3
D−Ly−R2	55503644	53263288	48.9	93
D−Ly−R3	58295424	55780254	48.9	92.9
