# Supplementary material for: Evaluation of Differentially Expressed Genes in Leaves vs. Roots Subjected to Drought Stress in Flax (Linum usitatissimum L.)
Source: Int J Mol Sci. 2023 Jul 27;24(15):12019. doi: 10.3390/ijms241512019 (PMC10419004; doi:10.3390/ijms241512019)
Supplement: Supplementary file 1 [file ijms-24-12019-s001.zip › Supplementary Table S2.xlsx]

## Sheet: D−Fn−L vs M−Fn−L
GO_acc	term_type	Term	queryitem	querytotal	bgitem	bgtotal	pvalue	FDR
GO:0015979	BP	photosynthesis	95	6046	124	22108	2.6e-13	1.3e-09
GO:0008152	BP	metabolic process	3189	6046	10799	22108	4.2e-08	0.0001
GO:0019684	BP	photosynthesis, light reaction	41	6046	52	22108	8.6e-07	0.0014
GO:0009765	BP	photosynthesis, light harvesting	34	6046	41	22108	3.4e-06	0.0035
GO:0044237	BP	cellular metabolic process	2008	6046	6673	22108	3.7e-06	0.0035
GO:0006520	BP	cellular amino acid metabolic process	101	6046	226	22108	4.1e-05	0.033
GO:0043412	BP	macromolecule modification	735	6046	2294	22108	5e-05	0.034
GO:0019752	BP	carboxylic acid metabolic process	190	6046	508	22108	0.00016	0.079
GO:0009987	BP	cellular process	2420	6046	8287	22108	0.00017	0.079
GO:0006464	BP	cellular protein modification process	706	6046	2226	22108	0.00018	0.079
GO:0036211	BP	protein modification process	706	6046	2226	22108	0.00018	0.079
GO:0044436	CC	thylakoid part	54	6046	71	22108	4e-08	1.2e-05
GO:0009579	CC	thylakoid	54	6046	71	22108	4e-08	1.2e-05
GO:0034357	CC	photosynthetic membrane	53	6046	70	22108	5.9e-08	1.2e-05
GO:0009521	CC	photosystem	52	6046	68	22108	6.3e-08	1.2e-05
GO:0042651	CC	thylakoid membrane	30	6046	42	22108	8.9e-05	0.013
GO:0009523	CC	photosystem II	31	6046	45	22108	0.00011	0.014
GO:0009522	CC	photosystem I	19	6046	20	22108	0.00015	0.016
GO:0003824	MF	catalytic activity	3034	6046	10361	22108	2.6e-06	0.0067
GO:0016740	MF	transferase activity	1223	6046	3979	22108	4.6e-05	0.06

## Sheet: D−Fn−R vs M−Fn−R
GO_acc	term_type	Term	queryitem	querytotal	bgitem	bgtotal	pvalue	FDR
GO:0006412	BP	translation	218	2408	679	22108	5.5e-38	1.7e-34
GO:0043043	BP	peptide biosynthetic process	218	2408	686	22108	1.9e-37	2e-34
GO:0043604	BP	amide biosynthetic process	218	2408	686	22108	1.9e-37	2e-34
GO:0006518	BP	peptide metabolic process	219	2408	702	22108	1.3e-36	9.6e-34
GO:0043603	BP	cellular amide metabolic process	219	2408	709	22108	4.3e-36	2.6e-33
GO:1901566	BP	organonitrogen compound biosynthetic process	268	2408	1017	22108	3.3e-34	1.6e-31
GO:1901564	BP	organonitrogen compound metabolic process	298	2408	1342	22108	4.5e-27	2e-24
GO:1901576	BP	organic substance biosynthetic process	509	2408	3107	22108	3.6e-19	1.3e-16
GO:0005840	CC	ribosome	206	2408	482	22108	6e-51	2.5e-48
GO:0043232	CC	intracellular non-membrane-bounded organelle	289	2408	916	22108	2.5e-49	3.5e-47
GO:0043228	CC	non-membrane-bounded organelle	289	2408	916	22108	2.5e-49	3.5e-47
GO:1990904	CC	ribonucleoprotein complex	213	2408	564	22108	8e-46	6.7e-44
GO:0030529	CC	intracellular ribonucleoprotein complex	213	2408	564	22108	8e-46	6.7e-44
GO:0032991	CC	macromolecular complex	338	2408	1630	22108	3.6e-26	2.5e-24
GO:0044444	CC	cytoplasmic part	253	2408	1098	22108	6.9e-25	4.1e-23
GO:0043229	CC	intracellular organelle	402	2408	2275	22108	1.1e-19	5e-18
GO:0043226	CC	organelle	402	2408	2275	22108	1.1e-19	5e-18
GO:0005737	CC	cytoplasm	266	2408	1317	22108	3.1e-19	1.3e-17
GO:0003735	MF	structural constituent of ribosome	204	2408	489	22108	3.7e-49	4.6e-46
GO:0005198	MF	structural molecule activity	205	2408	535	22108	7.3e-45	4.5e-42

## Sheet: D−Ly−L vs M−Ly−L
GO_acc	term_type	Term	queryitem	querytotal	bgitem	bgtotal	pvalue	FDR
GO:0015979	BP	photosynthesis	83	6957	124	22108	1.7e-07	0.00089
GO:0044237	BP	cellular metabolic process	2276	6957	6673	22108	3.7e-05	0.096
GO:0009765	BP	photosynthesis, light harvesting	33	6957	41	22108	7.7e-05	0.13
GO:0019684	BP	photosynthesis, light reaction	37	6957	52	22108	0.00018	0.19
GO:0043412	BP	macromolecule modification	829	6957	2294	22108	0.00019	0.19
GO:0008152	BP	metabolic process	3557	6957	10799	22108	0.00047	0.36
GO:0009987	BP	cellular process	2760	6957	8287	22108	0.00056	0.36
GO:0006464	BP	cellular protein modification process	796	6957	2226	22108	0.00064	0.36
GO:0036211	BP	protein modification process	796	6957	2226	22108	0.00064	0.36
GO:0006793	BP	phosphorus metabolic process	788	6957	2230	22108	0.0018	0.87
GO:0006796	BP	phosphate-containing compound metabolic process	785	6957	2222	22108	0.0019	0.87
GO:0009522	CC	photosystem I	20	6957	20	22108	0.00031	0.28
GO:0009521	CC	photosystem	41	6957	68	22108	0.00097	0.28
GO:0044436	CC	thylakoid part	42	6957	71	22108	0.0011	0.28
GO:0009579	CC	thylakoid	42	6957	71	22108	0.0011	0.28
GO:0034357	CC	photosynthetic membrane	41	6957	70	22108	0.0015	0.3
GO:0016740	MF	transferase activity	1393	6957	3979	22108	8.7e-05	0.25
GO:0003824	MF	catalytic activity	3414	6957	10361	22108	0.00068	0.99
GO:0008168	MF	methyltransferase activity	157	6957	372	22108	0.0013	1
GO:0016741	MF	transferase activity, transferring one-carbon groups	162	6957	387	22108	0.0015	1

## Sheet: D−Ly−R vs M−Ly−R
GO_acc	term_type	Term	queryitem	querytotal	bgitem	bgtotal	pvalue	FDR
GO:0007017	BP	microtubule-based process	80	2850	201	22108	4.1e-15	1.3e-11
GO:0006928	BP	movement of cell or subcellular component	54	2850	115	22108	7.7e-13	8.2e-10
GO:0007018	BP	microtubule-based movement	54	2850	115	22108	7.7e-13	8.2e-10
GO:0005975	BP	carbohydrate metabolic process	190	2850	992	22108	5.4e-07	0.00043
GO:0015630	CC	microtubule cytoskeleton	82	2850	193	22108	9.7e-17	6e-14
GO:0044430	CC	cytoskeletal part	88	2850	242	22108	1.3e-14	3.5e-12
GO:0005856	CC	cytoskeleton	92	2850	262	22108	1.7e-14	3.5e-12
GO:0005871	CC	kinesin complex	54	2850	114	22108	5.9e-13	9.2e-11
GO:0005875	CC	microtubule associated complex	59	2850	137	22108	1.2e-12	1.5e-10
GO:0043232	CC	intracellular non-membrane-bounded organelle	176	2850	916	22108	1.2e-06	0.00011
GO:0043228	CC	non-membrane-bounded organelle	176	2850	916	22108	1.2e-06	0.00011
GO:0008017	MF	microtubule binding	61	2850	130	22108	2.7e-14	3.4e-11
GO:0015631	MF	tubulin binding	61	2850	132	22108	4.5e-14	3.4e-11
GO:0008092	MF	cytoskeletal protein binding	67	2850	161	22108	1.3e-13	6.6e-11
GO:0003777	MF	microtubule motor activity	54	2850	115	22108	7.7e-13	2.9e-10
GO:0003774	MF	motor activity	58	2850	138	22108	4.1e-12	1.2e-09
GO:0005507	MF	copper ion binding	46	2850	121	22108	8.3e-09	2.1e-06
GO:0016462	MF	pyrophosphatase activity	139	2850	682	22108	1.1e-06	0.00024
GO:0016818	MF	hydrolase activity, acting on acid anhydrides, in phosphorus-containing anhydrides	140	2850	691	22108	1.4e-06	0.00026
GO:0017111	MF	nucleoside-triphosphatase activity	135	2850	663	22108	1.7e-06	0.00028
