# Supplementary material for: Evaluation of Differentially Expressed Genes in Leaves vs. Roots Subjected to Drought Stress in Flax (Linum usitatissimum L.)
Source: Int J Mol Sci. 2023 Jul 27;24(15):12019. doi: 10.3390/ijms241512019 (PMC10419004; doi:10.3390/ijms241512019)
Supplement: Supplementary file 1 [file ijms-24-12019-s001.zip › Supplementary Table S3.xlsx]

## Sheet: D−Fn−L vs M−Fn−L
KEGG	MainClass	Term	GeneHitsInSelectedSet	AllGenesInSelectedSet	GeneHitsInBackground	enrichFactor	corrected p-value(BH method)	p-value
00194 Photosynthesis proteins	A09180 Brite Hierarchies	Photosynthesis proteins	86	3157	112	2.59252	7.06102e-15	6.66134e-17
00195 Photosynthesis	A09100 Metabolism	Photosynthesis	58	3157	78	2.51059	7.06102e-14	6.66134e-16
A09100 Metabolism	A09100 Metabolism	Metabolism	1068	3157	3101	1.16282	1.75914e-10	2.48934e-12
00196 Photosynthesis - antenna proteins	A09100 Metabolism	Photosynthesis - antenna proteins	26	3157	32	2.74325	1.10344e-07	2.08197e-09
03009 Ribosome biogenesis	A09180 Brite Hierarchies	Ribosome biogenesis	185	3157	448	1.39423	2.13389e-06	5.03276e-08
B 09181 Protein families: metabolism	A09180 Brite Hierarchies	Protein families: metabolism	633	3157	1843	1.15963	2.67628e-05	7.57439e-07
B 09105 Amino acid metabolism	A09100 Metabolism	Amino acid metabolism	213	3157	563	1.27736	0.00032106	1.0601e-05
B 09102 Energy metabolism	A09100 Metabolism	Energy metabolism	176	3157	463	1.28343	0.00121615	4.58925e-05
B 09103 Lipid metabolism	A09100 Metabolism	Lipid metabolism	177	3157	472	1.26611	0.00242147	0.000102798
01003 Glycosyltransferases	A09180 Brite Hierarchies	Glycosyltransferases	86	3157	216	1.34427	0.0164775	0.000777239
00260 Glycine, serine and threonine metabolism	A09100 Metabolism	Glycine, serine and threonine metabolism	46	3157	107	1.4515	0.0414916	0.00215287
00250 Alanine, aspartate and glutamate metabolism	A09100 Metabolism	Alanine, aspartate and glutamate metabolism	30	3157	65	1.5583	0.0609659	0.0034509
00860 Porphyrin and chlorophyll metabolism	A09100 Metabolism	Porphyrin and chlorophyll metabolism	31	3157	68	1.5392	0.0613181	0.00376007
00630 Glyoxylate and dicarboxylate metabolism	A09100 Metabolism	Glyoxylate and dicarboxylate metabolism	42	3157	100	1.41805	0.0822069	0.00542876
00500 Starch and sucrose metabolism	A09100 Metabolism	Starch and sucrose metabolism	64	3157	165	1.3096	0.0971317	0.00687253
03029 Mitochondrial biogenesis	A09180 Brite Hierarchies	Mitochondrial biogenesis	157	3157	452	1.17274	0.122904	0.00927578
00350 Tyrosine metabolism	A09100 Metabolism	Tyrosine metabolism	29	3157	66	1.48353	0.115859	0.00929055
00300 Lysine biosynthesis	A09100 Metabolism	Lysine biosynthesis	10	3157	17	1.98606	0.13516	0.0114758
00360 Phenylalanine metabolism	A09100 Metabolism	Phenylalanine metabolism	22	3157	48	1.54747	0.140083	0.0125546
B 09101 Carbohydrate metabolism	A09100 Metabolism	Carbohydrate metabolism	313	3157	956	1.10542	0.161219	0.0152093

## Sheet: D−Fn−R vs M−Fn−R
KEGG	MainClass	Term	GeneHitsInSelectedSet	AllGenesInSelectedSet	GeneHitsInBackground	enrichFactor	corrected p-value(BH method)	p-value
B 09122 Translation	A09120 Genetic Information Processing	Translation	256	1365	944	2.11764	1.03806e-17	2.22045e-19
03010 Ribosome	A09120 Genetic Information Processing	Ribosome	214	1365	465	3.59372	2.02416e-16	5.41218e-18
00194 Photosynthesis proteins	A09180 Brite Hierarchies	Photosynthesis proteins	51	1365	112	3.55579	1.03806e-14	2.22045e-16
04812 Cytoskeleton proteins	A09180 Brite Hierarchies	Cytoskeleton proteins	64	1365	218	2.29249	2.02416e-09	5.41218e-11
00196 Photosynthesis - antenna proteins	A09100 Metabolism	Photosynthesis - antenna proteins	20	1365	32	4.88049	1.88391e-09	6.04462e-11
00195 Photosynthesis	A09100 Metabolism	Photosynthesis	31	1365	78	3.10349	5.13647e-08	1.92274e-09
B 09102 Energy metabolism	A09100 Metabolism	Energy metabolism	96	1365	463	1.6191	1.64471e-05	7.03618e-07
03036 Chromosome and associated proteins	A09180 Brite Hierarchies	Chromosome and associated proteins	143	1365	792	1.40992	0.000143987	6.92988e-06
03032 DNA replication proteins	A09180 Brite Hierarchies	DNA replication proteins	44	1365	177	1.94117	0.000153733	8.221e-06
A09120 Genetic Information Processing	A09120 Genetic Information Processing	Genetic Information Processing	331	1365	2156	1.19885	0.000980301	5.76647e-05
B 09101 Carbohydrate metabolism	A09100 Metabolism	Carbohydrate metabolism	156	1365	956	1.27424	0.00864859	0.00055499
00710 Carbon fixation in photosynthetic organisms	A09100 Metabolism	Carbon fixation in photosynthetic organisms	26	1365	105	1.93361	0.00853338	0.00059323
A09180 Brite Hierarchies	A09180 Brite Hierarchies	Brite Hierarchies	1038	1365	7755	1.0452	0.0234511	0.0017557
03030 DNA replication	A09120 Genetic Information Processing	DNA replication	18	1365	69	2.03708	0.0264615	0.00212258
01003 Glycosyltransferases	A09180 Brite Hierarchies	Glycosyltransferases	42	1365	216	1.51838	0.0398685	0.00341121
00630 Glyoxylate and dicarboxylate metabolism	A09100 Metabolism	Glyoxylate and dicarboxylate metabolism	22	1365	100	1.71793	0.0782393	0.00711266
B 09183 Protein families: signaling and cellular processes	A09180 Brite Hierarchies	Protein families: signaling and cellular processes	267	1365	1829	1.13994	0.0739331	0.00711655
00051 Fructose and mannose metabolism	A09100 Metabolism	Fructose and mannose metabolism	20	1365	93	1.67931	0.126143	0.0128166
00270 Cysteine and methionine metabolism	A09100 Metabolism	Cysteine and methionine metabolism	28	1365	143	1.52899	0.127385	0.013624
00290 Valine, leucine and isoleucine biosynthesis	A09100 Metabolism	Valine, leucine and isoleucine biosynthesis	7	1365	23	2.37659	0.180693	0.021258

## Sheet: D−Ly−L vs M−Ly−L
KEGG	MainClass	Term	GeneHitsInSelectedSet	AllGenesInSelectedSet	GeneHitsInBackground	enrichFactor	corrected p-value(BH method)	p-value
00194 Photosynthesis proteins	A09180 Brite Hierarchies	Photosynthesis proteins	73	3620	112	1.91917	2.67974e-09	1.24062e-11
00196 Photosynthesis - antenna proteins	A09100 Metabolism	Photosynthesis - antenna proteins	25	3620	32	2.30037	4.16142e-05	3.85317e-07
B 09181 Protein families: metabolism	A09180 Brite Hierarchies	Protein families: metabolism	717	3620	1843	1.14552	4.22222e-05	5.86419e-07
00195 Photosynthesis	A09100 Metabolism	Photosynthesis	47	3620	78	1.77424	9.14254e-05	1.69306e-06
B 09103 Lipid metabolism	A09100 Metabolism	Lipid metabolism	199	3620	472	1.24142	0.00392373	9.08271e-05
A09100 Metabolism	A09100 Metabolism	Metabolism	1131	3620	3101	1.07391	0.00928772	0.000257992
03009 Ribosome biogenesis	A09180 Brite Hierarchies	Ribosome biogenesis	185	3620	448	1.21591	0.017475	0.000566318
01003 Glycosyltransferases	A09180 Brite Hierarchies	Glycosyltransferases	95	3620	216	1.29502	0.0343246	0.00127128
00500 Starch and sucrose metabolism	A09100 Metabolism	Starch and sucrose metabolism	73	3620	165	1.30271	0.0875468	0.00364778
00561 Glycerolipid metabolism	A09100 Metabolism	Glycerolipid metabolism	43	3620	90	1.4068	0.0966658	0.00447527
00600 Sphingolipid metabolism	A09100 Metabolism	Sphingolipid metabolism	24	3620	45	1.57039	0.112524	0.00573038
00260 Glycine, serine and threonine metabolism	A09100 Metabolism	Glycine, serine and threonine metabolism	49	3620	107	1.3484	0.128121	0.00711782
00071 Fatty acid degradation	A09100 Metabolism	Fatty acid degradation	32	3620	65	1.44959	0.127407	0.00766801
03410 Base excision repair	A09120 Genetic Information Processing	Base excision repair	24	3620	46	1.53625	0.126164	0.0081773
00199 Cytochrome P450	A09180 Brite Hierarchies	Cytochrome P450	40	3620	85	1.38564	0.118286	0.00821433
B 09105 Amino acid metabolism	A09100 Metabolism	Amino acid metabolism	216	3620	563	1.12967	0.184906	0.0136968
03016 Transfer RNA biogenesis	A09180 Brite Hierarchies	Transfer RNA biogenesis	104	3620	256	1.19619	0.181691	0.0142997
00250 Alanine, aspartate and glutamate metabolism	A09100 Metabolism	Alanine, aspartate and glutamate metabolism	31	3620	65	1.40429	0.178793	0.0148994
B 09109 Metabolism of terpenoids and polyketides	A09100 Metabolism	Metabolism of terpenoids and polyketides	104	3620	257	1.19154	0.183576	0.0161479
00330 Arginine and proline metabolism	A09100 Metabolism	Arginine and proline metabolism	36	3620	78	1.35899	0.180851	0.0167454

## Sheet: D−Ly−R vs M−Ly−R
KEGG	MainClass	Term	GeneHitsInSelectedSet	AllGenesInSelectedSet	GeneHitsInBackground	enrichFactor	corrected p-value(BH method)	p-value
04812 Cytoskeleton proteins	A09180 Brite Hierarchies	Cytoskeleton proteins	76	1526	218	2.43511	2.506e-12	1.26565e-14
03036 Chromosome and associated proteins	A09180 Brite Hierarchies	Chromosome and associated proteins	178	1526	792	1.56984	8.83573e-09	8.92498e-11
B 09101 Carbohydrate metabolism	A09100 Metabolism	Carbohydrate metabolism	201	1526	956	1.46859	1.43558e-07	2.17513e-09
B 09183 Protein families: signaling and cellular processes	A09180 Brite Hierarchies	Protein families: signaling and cellular processes	334	1526	1829	1.27554	7.51811e-06	1.51881e-07
00520 Amino sugar and nucleotide sugar metabolism	A09100 Metabolism	Amino sugar and nucleotide sugar metabolism	53	1526	188	1.96916	1.91921e-05	4.84648e-07
99980 Enzymes with EC numbers	A09190 Not Included in Pathway or Brite	Enzymes with EC numbers	73	1526	306	1.66634	0.00014811	4.48817e-06
B 09191 Unclassified: metabolism	A09190 Not Included in Pathway or Brite	Unclassified: metabolism	74	1526	317	1.63055	0.000250483	8.85547e-06
A09190 Not Included in Pathway or Brite	A09190 Not Included in Pathway or Brite	Not Included in Pathway or Brite	90	1526	433	1.45183	0.00292044	0.000117997
03030 DNA replication	A09120 Genetic Information Processing	DNA replication	22	1526	69	2.22708	0.00345246	0.00015693
04147 Exosome	A09180 Brite Hierarchies	Exosome	147	1526	779	1.31808	0.00320713	0.000161976
01003 Glycosyltransferases	A09180 Brite Hierarchies	Glycosyltransferases	49	1526	216	1.58454	0.0101948	0.00056638
00040 Pentose and glucuronate interconversions	A09100 Metabolism	Pentose and glucuronate interconversions	32	1526	126	1.77395	0.0112506	0.000681857
00270 Cysteine and methionine metabolism	A09100 Metabolism	Cysteine and methionine metabolism	35	1526	143	1.7096	0.0123826	0.000813002
A09100 Metabolism	A09100 Metabolism	Metabolism	494	1526	3101	1.11272	0.0194837	0.00137764
03032 DNA replication proteins	A09180 Brite Hierarchies	DNA replication proteins	40	1526	177	1.57851	0.0247854	0.00187768
00051 Fructose and mannose metabolism	A09100 Metabolism	Fructose and mannose metabolism	24	1526	93	1.80256	0.0299039	0.00241648
00500 Starch and sucrose metabolism	A09100 Metabolism	Starch and sucrose metabolism	36	1526	165	1.52398	0.0657149	0.00564219
00300 Lysine biosynthesis	A09100 Metabolism	Lysine biosynthesis	7	1526	17	2.87615	0.0697731	0.00634301
02048 Prokaryotic defense system	A09180 Brite Hierarchies	Prokaryotic defense system	6	1526	15	2.79397	0.139742	0.0134096
B 09105 Amino acid metabolism	A09100 Metabolism	Amino acid metabolism	98	1526	563	1.21585	0.200159	0.020218
