# Supplementary material for: Evaluation of Differentially Expressed Genes in Leaves vs. Roots Subjected to Drought Stress in Flax (Linum usitatissimum L.)
Source: Int J Mol Sci. 2023 Jul 27;24(15):12019. doi: 10.3390/ijms241512019 (PMC10419004; doi:10.3390/ijms241512019)
Supplement: Supplementary file 1 [file ijms-24-12019-s001.zip › Supplementary Table S4.xlsx]

## Sheet: photosynthesis
	NAME	DESCRIPTION	M−Fn−L	M−Fn−R	D−Fn−L	D−Fn−R	M−Ly−L	M−Ly−R	D−Ly−L	D−Ly−R
Lus10000352	PS.lightreaction.photosystem II.PSII polypeptide subunits	moderately similar to ( 293) AT4G15510 | Symbols: | photosystem II reaction center PsbP family protein | chr4:8861351-8862529 FORWARDmoderately similar to ( 303) loc_os07g17390 12007.m06180 protein thylakoid lumenal 21.5 kDa protein, chloroplast precursor, putative, expressedPsbP no original description	336.333	7.66667	22.6138	29.994	404	10	43.3245	26.9923
Lus10000614	PS.lightreaction.photosystem II.PSII polypeptide subunits	moderately similar to ( 294) AT4G15510 | Symbols: | photosystem II reaction center PsbP family protein | chr4:8861351-8862529 FORWARDmoderately similar to ( 301) loc_os07g17390 12007.m06180 protein thylakoid lumenal 21.5 kDa protein, chloroplast precursor, putative, expressedPsbP no original description	475	9.66667	28.8098	36.1181	543	15	58.9181	29.7792
Lus10001861	PS.lightreaction.photosystem II.PSII polypeptide subunits	moderately similar to ( 322) AT5G11450 | Symbols: | oxygen-evolving complex-related | chr5:3654475-3656357 FORWARDmoderately similar to ( 300) loc_os01g43070 12001.m42679 protein expressed protein no original description	376.667	51.3333	50.7115	65.2998	358.667	42.3333	66.7352	59.8036
Lus10002084	PS.lightreaction.photosystem I.PSI polypeptide subunits	weakly similar to ( 169) AT5G64040 | Symbols: PSAN | PSAN; calmodulin binding | chr5:25628690-25629409 REVERSEweakly similar to ( 150) PSAN_HORVU Photosystem I reaction center subunit N, chloroplast precursor (PSI-N) - Hordeum vulgare (Barley)weakly similar to ( 157) loc_os12g08770 12012.m04863 protein photosystem I reaction center subunit N, chloroplast precursor, putative, expressedPsaN no orig…	3935.33	4.33333	674.141	92.9567	5358	22	789.151	78.0519
Lus10002143	PS.lightreaction.photosystem I.PSI polypeptide subunits	moderately similar to ( 257) AT4G12800 | Symbols: PSAL | PSAL (photosystem I subunit L) | chr4:7521469-7522493 FORWARDmoderately similar to ( 261) PSAL_SPIOL Photosystem I reaction center subunit XI, chloroplast precursor (PSI-L) (PSI subunit V) - Spinacia oleracea (Spinach)moderately similar to ( 238) loc_os12g23200 12012.m26900 protein photosystem I reaction center subunit XI, chloroplast precu…	8977.67	33.6667	2036.83	243.928	12301.3	65.3333	3309.55	279.574
Lus10003289	PS.lightreaction.photosystem II.PSII polypeptide subunits	moderately similar to ( 256) AT3G55330 | Symbols: PPL1 | PPL1 (PsbP-like protein 1); calcium ion binding | chr3:20514031-20515275 REVERSEmoderately similar to ( 263) loc_os10g32348 12010.m22024 protein psbP family protein, expressedPsbP no original description	534	97	132.68	297.981	620.333	95.6667	219.411	324.001
Lus10003849	PS.lightreaction.photosystem I.PSI polypeptide subunits	weakly similar to ( 160) AT5G64040 | Symbols: PSAN | PSAN; calmodulin binding | chr5:25628690-25629409 REVERSEweakly similar to ( 142) PSAN_HORVU Photosystem I reaction center subunit N, chloroplast precursor (PSI-N) - Hordeum vulgare (Barley)weakly similar to ( 149) loc_os12g08770 12012.m04863 protein photosystem I reaction center subunit N, chloroplast precursor, putative, expressedPsaN no orig…	5266.67	19.6667	645.054	203.616	6207	48	674.853	141.236
Lus10004054	PS.lightreaction.photosystem II.PSII polypeptide subunits	very weakly similar to (87.0) AT2G01918 | Symbols: | calcium ion binding | chr2:424254-425678 REVERSEvery weakly similar to (94.0) loc_os04g44200 12004.m09378 protein oxygen-evolving enhancer protein 3, chloroplast precursor, putative no original description	38.6667	1.66667	8.5758	1.70979	51.3333	1	17.6125	2.40039
Lus10005013	tetrapyrrole synthesis.magnesium chelatase	nearly identical (1041) AT1G08520 | Symbols: PDE166, CHLD | CHLD; ATP binding / magnesium chelatase/ nucleoside-triphosphatase/ nucleotide binding | chr1:2696538-2700819 FORWARDnearly identical (1041) CHLD_TOBAC Magnesium-chelatase subunit chlD, chloroplast precursor (EC 6.6.1.1) (Mg-protoporphyrin IX chelatase) (Mg-chelatase subunit D) - Nicotiana tabacum (Common tobacco)highly similar to ( 983)…	739.667	84.6667	171.681	100.279	866.333	103.333	253.648	87.4079
Lus10006137	not assigned.unknown	weakly similar to ( 114) AT1G49975 | Symbols: | unknown protein | chr1:18504845-18505431 FORWARDvery weakly similar to (86.7) loc_os03g52130 12003.m10190 protein expressed protein no original description	540	4.66667	39.0626	10.8848	638	6.33333	56.1974	8.56711
Lus10006243	not assigned.unknown	no original description	3375.67	32.3333	1986.16	221.382	4190	52.3333	4133.25	186.05
Lus10006751	PS.lightreaction.photosystem II.PSII polypeptide subunits	moderately similar to ( 229) AT4G05180 | Symbols: PSBQ, PSBQ-2, PSII-Q | PSBQ-2; calcium ion binding | chr4:2672093-2673170 REVERSEmoderately similar to ( 213) PSBQ_SPIOL Oxygen-evolving enhancer protein 3, chloroplast precursor (OEE3) (16 kDa subunit of oxygen evolving system of photosystem II) (OEC 16 kDa subunit) - Spinacia oleracea (Spinach)weakly similar to ( 175) loc_os07g36080 12007.m07970…	957.333	30.6667	196.016	101.564	1125.67	59	664.181	134.979
Lus10007399	PS.lightreaction.photosystem I.PSI polypeptide subunits	weakly similar to ( 120) AT1G30380 | Symbols: PSAK | PSAK (photosystem I subunit K) | chr1:10722325-10723013 FORWARDweakly similar to ( 119) PSAK_MEDSA Photosystem I reaction center subunit psaK, chloroplast precursor (Photosystem I subunit X) (PSI-K) - Medicago sativa (Alfalfa)weakly similar to ( 117) loc_os07g05480 12007.m079603 protein photosystem I reaction center subunit psaK, chloroplast pr…	3491.33	6.33333	215.528	25.5313	5762	23.3333	306.224	23.9362
Lus10008747	PS.lightreaction.photosystem I.PSI polypeptide subunits	moderately similar to ( 323) AT4G12830 | Symbols: | hydrolase, alpha/beta fold family protein | chr4:7531189-7533327 FORWARDmoderately similar to ( 264) PSAL_SPIOL Photosystem I reaction center subunit XI, chloroplast precursor (PSI-L) (PSI subunit V) - Spinacia oleracea (Spinach)moderately similar to ( 346) loc_os01g69060 12001.m150825 protein hydrolase-like protein, putative, expressedPsaL psaL…	8042	15	608.091	103.215	11149.7	60.3333	1052.11	92.9617
Lus10011913	PS.lightreaction.photosystem I.PSI polypeptide subunits	weakly similar to ( 105) AT2G20260 | Symbols: PSAE-2 | PSAE-2 (photosystem I subunit E-2); catalytic | chr2:8736780-8737644 FORWARDweakly similar to ( 110) PSAEA_NICSY Photosystem I reaction center subunit IV A, chloroplast precursor (PSI-E A) [Contains: Photosystem I reaction center subunit IV A isoform 2] - Nicotiana sylvestris (Wood tobacco)weakly similar to ( 110) loc_os07g25430 12007.m29150 …	6723	35.3333	1841.33	138.609	9565.67	72.6667	2382.6	120.348
Lus10012086	PS.lightreaction.photosystem I.PSI polypeptide subunits	weakly similar to ( 120) AT1G30380 | Symbols: PSAK | PSAK (photosystem I subunit K) | chr1:10722325-10723013 FORWARDweakly similar to ( 121) PSAK_MEDSA Photosystem I reaction center subunit psaK, chloroplast precursor (Photosystem I subunit X) (PSI-K) - Medicago sativa (Alfalfa)weakly similar to ( 114) loc_os07g05480 12007.m079603 protein photosystem I reaction center subunit psaK, chloroplast pr…	4362	3	594.176	21.7887	5802.33	22.3333	718.809	22.5689
Lus10013201	transport.ABC transporters and multidrug resistance systems	nearly identical (1409) AT3G13080 | Symbols: ATMRP3, MRP3 | ATMRP3; ATPase, coupled to transmembrane movement of substances / chlorophyll catabolite transporter/ glutathione S-conjugate-exporting ATPase | chr3:4197606-4201250 REVERSEweakly similar to ( 172) MDR_ORYSA Putative multidrug resistance protein (P-glycoprotein) - Oryza sativa (Rice)nearly identical (1375) loc_os01g07870 12001.m07414 pro…	1576.33	404.333	437.355	601.609	1219	545	433.602	604.43
Lus10013448	redox.thioredoxin	weakly similar to ( 121) AT5G08410 | Symbols: FTRA2 | FTRA2 (ferredoxin/thioredoxin reductase subunit A (variable subunit) 2); catalytic/ ferredoxin reductase/ ferredoxin:thioredoxin reductase/ lipoate synthase | chr5:2709974-2710528 REVERSEweakly similar to ( 107) FTRV_MAIZE Ferredoxin-thioredoxin reductase, variable chain (FTR-V) (Ferredoxin-thioredoxin reductase subunit A) (FTR-A) - Zea mays (…	402.333	48.3333	160.022	54.307	441.333	46	145.658	46.1676
Lus10013703	secondary metabolism.isoprenoids.non-mevalonate pathway.geranylgeranyl pyrophosphate synthase	highly similar to ( 533) AT1G78510 | Symbols: SPS1 | SPS1 (solanesyl diphosphate synthase 1); trans-octaprenyltranstransferase | chr1:29535410-29537042 REVERSEweakly similar to ( 129) GGPPS_SINAL Geranylgeranyl pyrophosphate synthetase, chloroplast precursor (GGPP synthetase) (GGPS) [Includes: Dimethylallyltranstransferase (EC 2.5.1.1); Geranyltranstransferase (EC 2.5.1.10); Farnesyltranstransfer…	3377	834.333	3545.06	1770.28	2218.67	781.333	2403.27	1551.61
Lus10014751	PS.lightreaction.photosystem II.PSII polypeptide subunits	weakly similar to ( 115) AT2G30570 | Symbols: PSBW | PSBW (PHOTOSYSTEM II REACTION CENTER W) | chr2:13019326-13020053 REVERSEweakly similar to ( 115) PSBW_SPIOL Photosystem II reaction center W protein, chloroplast precursor (PSII 6.1 kDa protein) - Spinacia oleracea (Spinach)PsbW no original description	1731	4	291.936	19.0239	2469.33	11	378.061	26.6732
Lus10015302	tetrapyrrole synthesis.magnesium chelatase	highly similar to ( 570) AT5G45930 | Symbols: CHLI2, CHL I2, CHLI-2 | CHLI2 (MAGNESIUM CHELATASE I2); ATPase/ magnesium chelatase | chr5:18628095-18629565 FORWARDhighly similar to ( 595) CHLI_SOYBN Magnesium-chelatase subunit chlI, chloroplast precursor (EC 6.6.1.1) (Mg-protoporphyrin IX chelatase) - Glycine max (Soybean)highly similar to ( 554) loc_os03g36540 12003.m08774 protein magnesium-chela…	1966.33	250.667	400.502	355.812	2299.33	257.333	615.246	339.537
Lus10016419	PS.lightreaction.photosystem II.PSII polypeptide subunits	moderately similar to ( 220) loc_os08g39430 12008.m07924 protein thylakoid lumenal 19 kDa protein, chloroplast precursor, putative, expressed no original description	597.333	47.6667	211.472	112.504	743	52	352.607	157.727
Lus10016783	PS.lightreaction.photosystem II.PSII polypeptide subunits	moderately similar to ( 475) AT3G50820 | Symbols: PSBO2, PSBO-2, OEC33 | PSBO2 (PHOTOSYSTEM II SUBUNIT O-2); oxygen evolving/ poly(U) binding | chr3:18891008-18892311 REVERSEmoderately similar to ( 484) PSBO_TOBAC Oxygen-evolving enhancer protein 1, chloroplast precursor (OEE1) (33 kDa subunit of oxygen evolving system of photosystem II) (OEC 33 kDa subunit) (33 kDa thylakoid membrane protein) - …	22335.3	49.3333	7466.41	494.694	28216.7	167.667	12964.6	352.269
Lus10017476	PS.lightreaction.photosystem I.PSI polypeptide subunits	weakly similar to ( 191) AT1G55670 | Symbols: PSAG | PSAG (PHOTOSYSTEM I SUBUNIT G) | chr1:20802874-20803356 REVERSEweakly similar to ( 179) PSAG_SPIOL Photosystem I reaction center subunit V, chloroplast precursor (PSI-G) (Photosystem I 9 kDa protein) - Spinacia oleracea (Spinach)weakly similar to ( 166) loc_os09g30340 12009.m06185 protein photosystem I reaction center subunit V, chloroplast pre…	4090.33	9.66667	590.636	42.2273	6565.67	32	1050.52	51.0009
Lus10017974	PS.lightreaction.photosystem I.PSI polypeptide subunits	weakly similar to ( 194) AT1G55670 | Symbols: PSAG | PSAG (PHOTOSYSTEM I SUBUNIT G) | chr1:20802874-20803356 REVERSEweakly similar to ( 183) PSAG_SPIOL Photosystem I reaction center subunit V, chloroplast precursor (PSI-G) (Photosystem I 9 kDa protein) - Spinacia oleracea (Spinach)weakly similar to ( 170) loc_os09g30340 12009.m06185 protein photosystem I reaction center subunit V, chloroplast pre…	339	1.33333	41.0818	2.03721	900	2.33333	72.0869	2.74091
Lus10018273	PS.lightreaction.photosystem I.PSI polypeptide subunits	moderately similar to ( 269) AT1G31330 | Symbols: PSAF | PSAF (photosystem I subunit F) | chr1:11215011-11215939 REVERSEmoderately similar to ( 260) PSAF_HORVU Photosystem I reaction center subunit III, chloroplast precursor (Light-harvesting complex I 17 kDa protein) (PSI-F) - Hordeum vulgare (Barley)moderately similar to ( 256) loc_os03g56670 12003.m34938 protein photosystem I reaction center s…	5681	10.3333	1379.69	68.8753	7647.33	41.3333	1585.17	79.7342
Lus10018385	PS.lightreaction.photosystem II.PSII polypeptide subunits	moderately similar to ( 213) AT4G05180 | Symbols: PSBQ, PSBQ-2, PSII-Q | PSBQ-2; calcium ion binding | chr4:2672093-2673170 REVERSEmoderately similar to ( 202) PSBQ_SPIOL Oxygen-evolving enhancer protein 3, chloroplast precursor (OEE3) (16 kDa subunit of oxygen evolving system of photosystem II) (OEC 16 kDa subunit) - Spinacia oleracea (Spinach)weakly similar to ( 178) loc_os07g36080 12007.m07970…	7567	4.33333	1906.42	53.9062	10622.7	31.3333	4243.93	52.3108
Lus10018528	protein.targeting	moderately similar to ( 309) AT2G20890 | Symbols: PSB29, THF1 | PSB29 | chr2:8987783-8989185 FORWARDmoderately similar to ( 317) THF1_ORYSA Protein THYLAKOID FORMATION1, chloroplast precursor - Oryza sativa (Rice)moderately similar to ( 317) loc_os07g37250 12007.m07975 protein chloroplast-localized Ptr ToxA-binding protein1, putative, expressed no original description	1415.67	266	413.586	486.276	1617.33	268.667	615.713	588.742
Lus10018771	not assigned.unknown	PsbW no original description	367.667	12	164.527	44.8361	318	7.33333	283.099	63.0355
Lus10018772	not assigned.unknown	no original description	1087.67	44.6667	768.418	183.082	982.333	31	940.488	161.547
Lus10019033	tetrapyrrole synthesis.magnesium chelatase	nearly identical (1056) AT1G08520 | Symbols: PDE166, CHLD | CHLD; ATP binding / magnesium chelatase/ nucleoside-triphosphatase/ nucleotide binding | chr1:2696538-2700819 FORWARDnearly identical (1062) CHLD_TOBAC Magnesium-chelatase subunit chlD, chloroplast precursor (EC 6.6.1.1) (Mg-protoporphyrin IX chelatase) (Mg-chelatase subunit D) - Nicotiana tabacum (Common tobacco)nearly identical (1006) …	1108	73.3333	251.77	116.812	1163.67	90	386.737	131.925
Lus10020071	PS.lightreaction.photosystem II.PSII polypeptide subunits	moderately similar to ( 234) AT4G05180 | Symbols: PSBQ, PSBQ-2, PSII-Q | PSBQ-2; calcium ion binding | chr4:2672093-2673170 REVERSEmoderately similar to ( 218) PSBQ_SPIOL Oxygen-evolving enhancer protein 3, chloroplast precursor (OEE3) (16 kDa subunit of oxygen evolving system of photosystem II) (OEC 16 kDa subunit) - Spinacia oleracea (Spinach)weakly similar to ( 177) loc_os07g36080 12007.m07970…	1303	52	241.195	196.857	1629.67	78.3333	1066.8	357.753
Lus10020717	PS.lightreaction.photosystem II.PSII polypeptide subunits	moderately similar to ( 323) AT1G06680 | Symbols: PSBP-1, OEE2, PSII-P | PSBP-1 (PHOTOSYSTEM II SUBUNIT P-1); poly(U) binding | chr1:2048076-2049186 FORWARDmoderately similar to ( 337) PSBP1_TOBAC Oxygen-evolving enhancer protein 2-1, chloroplast precursor (OEE2) (23 kDa subunit of oxygen evolving system of photosystem II) (OEC 23 kDa subunit) (23 kDa thylakoid membrane protein) - Nicotiana tabac…	8689.33	24	1594.59	110.434	13227.3	80.6667	4312.39	100.801
Lus10021923	PS.lightreaction.photosystem I.PSI polypeptide subunits	moderately similar to ( 271) AT4G02770 | Symbols: PSAD-1 | PSAD-1 (photosystem I subunit D-1) | chr4:1229247-1229873 REVERSEmoderately similar to ( 281) PSAD_CUCSA Photosystem I reaction center subunit II, chloroplast precursor (Photosystem I 20 kDa subunit) (PSI-D) (PS I subunit 5) - Cucumis sativus (Cucumber)moderately similar to ( 261) loc_os08g44680 12008.m08440 protein photosystem I reaction…	8464.67	158.667	1621.9	471.13	11506.3	250	2426.84	659.45
Lus10022110	PS.lightreaction.photosystem II.PSII polypeptide subunits	moderately similar to ( 308) AT5G11450 | Symbols: | oxygen-evolving complex-related | chr5:3654475-3656357 FORWARDmoderately similar to ( 290) loc_os01g43070 12001.m42679 protein expressed protein no original description	309	27.6667	15.4197	23.8636	293.667	29.3333	35.893	22.5066
Lus10022479	PS.lightreaction.photosystem II.PSII polypeptide subunits	moderately similar to ( 471) AT3G50820 | Symbols: PSBO2, PSBO-2, OEC33 | PSBO2 (PHOTOSYSTEM II SUBUNIT O-2); oxygen evolving/ poly(U) binding | chr3:18891008-18892311 REVERSEmoderately similar to ( 483) PSBO_SOLTU Oxygen-evolving enhancer protein 1, chloroplast precursor (OEE1) (33 kDa subunit of oxygen evolving system of photosystem II) (OEC 33 kDa subunit) (33 kDa thylakoid membrane protein) - …	19974	39	5435.92	384.659	25732.3	143	8553.31	236.648
Lus10022846	PS.lightreaction.photosystem I.PSI polypeptide subunits	weakly similar to ( 106) AT2G20260 | Symbols: PSAE-2 | PSAE-2 (photosystem I subunit E-2); catalytic | chr2:8736780-8737644 FORWARDweakly similar to ( 112) PSAEA_NICSY Photosystem I reaction center subunit IV A, chloroplast precursor (PSI-E A) [Contains: Photosystem I reaction center subunit IV A isoform 2] - Nicotiana sylvestris (Wood tobacco)weakly similar to ( 110) loc_os07g25430 12007.m29150 …	6434	28	2691.65	154.758	9484.33	68	4031.14	149.603
Lus10022867	PS.lightreaction.photosystem II.PSII polypeptide subunits	weakly similar to ( 194) AT4G28660 | Symbols: PSB28 | PSB28 (PHOTOSYSTEM II REACTION CENTER PSB28 PROTEIN) | chr4:14150008-14150933 FORWARDmoderately similar to ( 223) loc_os01g71190 12001.m13162 protein photosystem II reaction center W protein, putative, expressedpsbW Psb28 no original description	424.667	78	67.5172	130.096	588.667	76	92.4624	170.767
Lus10024858	not assigned.unknown	PsbW no original description	7013.33	56.3333	2094.36	439.696	6733.67	76.6667	2893.59	504.764
Lus10024959	PS.lightreaction.photosystem II.PSII polypeptide subunits	weakly similar to ( 197) AT4G28660 | Symbols: PSB28 | PSB28 (PHOTOSYSTEM II REACTION CENTER PSB28 PROTEIN) | chr4:14150008-14150933 FORWARDmoderately similar to ( 217) loc_os01g71190 12001.m13162 protein photosystem II reaction center W protein, putative, expressedpsbW Psb28 no original description	200.333	28	33.926	32.4188	270.333	27.6667	65.0138	51.6802
Lus10025007	not assigned.unknown	no original description	1890.67	3	219.863	40.3586	2850.67	13.6667	428.668	57.7728
Lus10025423	tetrapyrrole synthesis.magnesium chelatase	highly similar to ( 577) AT5G45930 | Symbols: CHLI2, CHL I2, CHLI-2 | CHLI2 (MAGNESIUM CHELATASE I2); ATPase/ magnesium chelatase | chr5:18628095-18629565 FORWARDhighly similar to ( 605) CHLI_SOYBN Magnesium-chelatase subunit chlI, chloroplast precursor (EC 6.6.1.1) (Mg-protoporphyrin IX chelatase) - Glycine max (Soybean)highly similar to ( 560) loc_os03g36540 12003.m08774 protein magnesium-chela…	1451.67	73.6667	193.153	48.2849	1864.67	91.3333	385.872	64.9115
Lus10025798	PS.lightreaction.photosystem I.PSI polypeptide subunits	weakly similar to ( 147) AT1G52230 | Symbols: PSAH2, PSAH-2, PSI-H | PSAH2 (PHOTOSYSTEM I SUBUNIT H2) | chr1:19454902-19455508 FORWARDweakly similar to ( 144) PSAH_BRARA Photosystem I reaction center subunit VI, chloroplast precursor (PSI-H) (Light-harvesting complex I 11 kDa protein) - Brassica rapa (Turnip)weakly similar to ( 131) loc_os05g48630 12005.m08934 protein expressed proteinPSI_PsaH no…	5643	14.6667	1759.12	107.796	7018.67	30	1981.43	75.2879
Lus10026205	PS.lightreaction.photosystem II.PSII polypeptide subunits	weakly similar to ( 143) AT1G79040 | Symbols: PSBR | PSBR (photosystem II subunit R) | chr1:29736085-29736781 FORWARDweakly similar to ( 152) PSBR_SOLTU Photosystem II 10 kDa polypeptide, chloroplast precursor (Light-inducible tissue-specific ST-LS1 protein) - Solanum tuberosum (Potato)weakly similar to ( 120) loc_os08g10020 12008.m26609 protein photosystem II 10 kDa polypeptide, chloroplast prec…	12187	123.667	5945.47	423.871	17703.7	196.333	10442.6	331.942
Lus10026458	not assigned.unknown	no original description	4067.67	21.3333	671.485	199.7	5302.33	32.6667	905.33	151.509
Lus10028633	PS.lightreaction.photosystem II.PSII polypeptide subunits	moderately similar to ( 347) AT1G77090 | Symbols: | thylakoid lumenal 29.8 kDa protein | chr1:28960576-28961875 REVERSEmoderately similar to ( 318) loc_os12g08830 12012.m26739 protein tat pathway signal sequence family protein, expressed no original description	441	43.6667	467.664	81.2909	462.667	38.3333	483.103	82.149
Lus10028806	PS.lightreaction.photosystem I.PSI polypeptide subunits	weakly similar to ( 195) AT1G55670 | Symbols: PSAG | PSAG (PHOTOSYSTEM I SUBUNIT G) | chr1:20802874-20803356 REVERSEweakly similar to ( 178) PSAG_SPIOL Photosystem I reaction center subunit V, chloroplast precursor (PSI-G) (Photosystem I 9 kDa protein) - Spinacia oleracea (Spinach)weakly similar to ( 164) loc_os09g30340 12009.m06185 protein photosystem I reaction center subunit V, chloroplast pre…	2472	4	532.836	24.1794	3960.33	18	511.867	22.1762
Lus10029785	PS.lightreaction.photosystem II.PSII polypeptide subunits	moderately similar to ( 309) AT3G56650 | Symbols: | thylakoid lumenal 20 kDa protein | chr3:20984807-20985913 FORWARDmoderately similar to ( 302) loc_os01g59090 12001.m12048 protein expressed protein no original description	123.333	2.33333	10.2889	7.83941	170.333	2.66667	11.8499	8.91273
Lus10029823	PS.lightreaction.photosystem II.PSII polypeptide subunits	moderately similar to ( 315) AT1G06680 | Symbols: PSBP-1, OEE2, PSII-P | PSBP-1 (PHOTOSYSTEM II SUBUNIT P-1); poly(U) binding | chr1:2048076-2049186 FORWARDmoderately similar to ( 328) PSBP1_TOBAC Oxygen-evolving enhancer protein 2-1, chloroplast precursor (OEE2) (23 kDa subunit of oxygen evolving system of photosystem II) (OEC 23 kDa subunit) (23 kDa thylakoid membrane protein) - Nicotiana tabac…	10040	36.6667	1740.74	189.655	14414	128.667	3537.93	152.395
Lus10029903	not assigned.unknown	moderately similar to ( 277) AT3G05410 | Symbols: | calcium ion binding | chr3:1554783-1561456 FORWARDmoderately similar to ( 225) loc_os01g70820 12001.m13127 protein expressed protein no original description	373.667	2	127.119	6.53963	364.667	2.66667	275.275	9.23674
Lus10030326	PS.lightreaction.photosystem II.PSII polypeptide subunits	moderately similar to ( 258) AT3G55330 | Symbols: PPL1 | PPL1 (PsbP-like protein 1); calcium ion binding | chr3:20514031-20515275 REVERSEmoderately similar to ( 261) loc_os10g32348 12010.m22024 protein psbP family protein, expressedPsbP no original description	341.333	30	86.0245	67.7163	442	36.6667	181.489	62.2076
Lus10030719	PS.lightreaction.photosystem II.PSII polypeptide subunits	moderately similar to ( 256) AT1G76450 | Symbols: | oxygen-evolving complex-related | chr1:28684618-28686109 FORWARDmoderately similar to ( 234) loc_os08g40160 12008.m07996 protein thylakoid lumen protein, chloroplast precursor, putative, expressed no original description	329	11	46.9537	10.6158	561.667	11.3333	106.316	10.2572
Lus10033434	not assigned.unknown	no original description	3714.67	23.6667	406.999	158.801	4958.67	49	457.708	246.151
Lus10033771	not assigned.unknown	weakly similar to ( 107) AT1G49975 | Symbols: | unknown protein | chr1:18504845-18505431 FORWARDvery weakly similar to (85.9) loc_os03g52130 12003.m10190 protein expressed protein no original description	653.667	44.3333	145.353	92.719	807	51.3333	189	91.2608
Lus10033862	PS.lightreaction.photosystem II.PSII polypeptide subunits	weakly similar to ( 108) AT2G30570 | Symbols: PSBW | PSBW (PHOTOSYSTEM II REACTION CENTER W) | chr2:13019326-13020053 REVERSEweakly similar to ( 109) PSBW_SPIOL Photosystem II reaction center W protein, chloroplast precursor (PSII 6.1 kDa protein) - Spinacia oleracea (Spinach)PsbW no original description	1047.67	3.66667	108.263	15.6582	1607.67	13	214.713	20.8789
Lus10035839	PS.lightreaction.photosystem II.PSII polypeptide subunits	moderately similar to ( 223) AT3G01440 | Symbols: | oxygen evolving enhancer 3 (PsbQ) family protein | chr3:168478-169407 FORWARDweakly similar to ( 152) loc_os07g01480 12007.m04628 protein oxygen evolving enhancer protein 3 containing protein, expressedPsbQ no original description	253.333	16.6667	33.2537	11.2392	501.667	15.3333	82.278	8.21511
Lus10035864	PS.lightreaction.photosystem I.PSI polypeptide subunits	weakly similar to ( 163) AT1G52230 | Symbols: PSAH2, PSAH-2, PSI-H | PSAH2 (PHOTOSYSTEM I SUBUNIT H2) | chr1:19454902-19455508 FORWARDweakly similar to ( 164) PSAH_SPIOL Photosystem I reaction center subunit VI, chloroplast precursor (PSI-H) (Light-harvesting complex I 11 kDa protein) - Spinacia oleracea (Spinach)weakly similar to ( 147) loc_os05g48630 12005.m08934 protein expressed proteinPSI_Ps…	4407.67	5	1629.56	15.6914	6407.67	22.3333	2382.17	41.0935
Lus10037159	PS.lightreaction.photosystem II.PSII polypeptide subunits	weakly similar to ( 167) AT1G14150 | Symbols: | oxygen evolving enhancer 3 (PsbQ) family protein | chr1:4839885-4840632 FORWARDweakly similar to ( 158) loc_os02g36850 12002.m08772 protein oxygen evolving enhancer protein 3, putative, expressedPsbQ no original description	124.333	3.33333	8.21405	4.75801	204	1.66667	13.2111	2.74091
Lus10039615	PS.lightreaction.photosystem II.PSII polypeptide subunits	moderately similar to ( 211) AT2G28605 | Symbols: | Encodes a PsbP domain-OEC23 like protein localized in thylakoid (peripheral-lumenal side). | chr2:12254911-12255689 FORWARDweakly similar to ( 104) loc_os04g35530 12004.m08642 protein expressed protein no original description	112.333	25	34.5912	30.9789	123.333	27	37.2914	26.9797
Lus10039748	not assigned.unknown	moderately similar to ( 311) AT2G20890 | Symbols: PSB29, THF1 | PSB29 | chr2:8987783-8989185 FORWARDmoderately similar to ( 313) THF1_ORYSA Protein THYLAKOID FORMATION1, chloroplast precursor - Oryza sativa (Rice)moderately similar to ( 313) loc_os07g37250 12007.m07975 protein chloroplast-localized Ptr ToxA-binding protein1, putative, expressed no original description	1272.67	94.6667	394.365	173.34	1448.33	92.3333	482.674	198.914
Lus10040639	PS.lightreaction.photosystem I.PSI polypeptide subunits	moderately similar to ( 266) AT1G31330 | Symbols: PSAF | PSAF (photosystem I subunit F) | chr1:11215011-11215939 REVERSEmoderately similar to ( 259) PSAF_SPIOL Photosystem I reaction center subunit III, chloroplast precursor (Light-harvesting complex I 17 kDa protein) (PSI-F) - Spinacia oleracea (Spinach)moderately similar to ( 248) loc_os03g56670 12003.m34938 protein photosystem I reaction cente…	7959.67	117.667	3384.25	385.996	11858	179.333	4295.8	320.44
Lus10041002	redox.thioredoxin	weakly similar to ( 121) AT5G08410 | Symbols: FTRA2 | FTRA2 (ferredoxin/thioredoxin reductase subunit A (variable subunit) 2); catalytic/ ferredoxin reductase/ ferredoxin:thioredoxin reductase/ lipoate synthase | chr5:2709974-2710528 REVERSEweakly similar to ( 107) FTRV_MAIZE Ferredoxin-thioredoxin reductase, variable chain (FTR-V) (Ferredoxin-thioredoxin reductase subunit A) (FTR-A) - Zea mays (…	918.667	143.667	1976.79	282.63	900.667	134.333	2132.29	280.142
Lus10041209	PS.lightreaction.photosystem I.PSI polypeptide subunits	moderately similar to ( 269) AT4G02770 | Symbols: PSAD-1 | PSAD-1 (photosystem I subunit D-1) | chr4:1229247-1229873 REVERSEmoderately similar to ( 281) PSAD_CUCSA Photosystem I reaction center subunit II, chloroplast precursor (Photosystem I 20 kDa subunit) (PSI-D) (PS I subunit 5) - Cucumis sativus (Cucumber)moderately similar to ( 260) loc_os08g44680 12008.m08440 protein photosystem I reaction…	6373.67	42.3333	1553.39	243.951	10306.7	106.667	3008.58	253.966
Lus10041966	PS.lightreaction.photosystem I.PSI polypeptide subunits	weakly similar to ( 194) AT1G55670 | Symbols: PSAG | PSAG (PHOTOSYSTEM I SUBUNIT G) | chr1:20802874-20803356 REVERSEweakly similar to ( 182) PSAG_SPIOL Photosystem I reaction center subunit V, chloroplast precursor (PSI-G) (Photosystem I 9 kDa protein) - Spinacia oleracea (Spinach)weakly similar to ( 169) loc_os09g30340 12009.m06185 protein photosystem I reaction center subunit V, chloroplast pre…	185	1	1.71466	1.02354	502	2.33333	9.14444	2.74728
Lus10042461	PS.lightreaction.photosystem II.PSII polypeptide subunits	weakly similar to ( 142) AT1G79040 | Symbols: PSBR | PSBR (photosystem II subunit R) | chr1:29736085-29736781 FORWARDweakly similar to ( 149) PSBR_SOLTU Photosystem II 10 kDa polypeptide, chloroplast precursor (Light-inducible tissue-specific ST-LS1 protein) - Solanum tuberosum (Potato)weakly similar to ( 120) loc_os08g10020 12008.m26609 protein photosystem II 10 kDa polypeptide, chloroplast prec…	19135.7	122	7798.25	659.504	25583.7	216.333	11167.2	516.963
Lus10042812	PS.lightreaction.photosystem II.PSII polypeptide subunits	moderately similar to ( 311) AT3G56650 | Symbols: | thylakoid lumenal 20 kDa protein | chr3:20984807-20985913 FORWARDmoderately similar to ( 302) loc_os01g59090 12001.m12048 protein expressed protein no original description	342	7.33333	194.352	17.7716	401	10.3333	173.071	29.089

## Sheet: photosynthesis-light reaction
	NAME	DESCRIPTION	M−Fn−L	M−Fn−R	D−Fn−L	D−Fn−R	M−Ly−L	M−Ly−R	D−Ly−L	D−Ly−R
Lus10006593	PS.lightreaction.photosystem II.PSII polypeptide subunits	moderately similar to ( 354) ATCG00680 | Symbols: PSBB | encodes for CP47, subunit of the photosystem II reaction center. | chrC:72371-73897 FORWARDmoderately similar to ( 355) PSBB_LOTJA Photosystem II P680 chlorophyll A apoprotein (CP-47 protein) - Lotus japonicusmoderately similar to ( 341) loc_os08g15260 12008.m05649 protein photosystem II P680 chlorophyll A apoprotein, putative, expressedpsb…	253	1	35.623	2.38527	121.333	2	123.533	1.02546
Lus10006594	PS.lightreaction.photosystem II.PSII polypeptide subunits	moderately similar to ( 498) ATCG00680 | Symbols: PSBB | encodes for CP47, subunit of the photosystem II reaction center. | chrC:72371-73897 FORWARDmoderately similar to ( 497) PSBB_TOBAC Photosystem II P680 chlorophyll A apoprotein (CP-47 protein) - Nicotiana tabacum (Common tobacco)moderately similar to ( 492) loc_osp1g00600 11562.m00051 protein photosystem II 47 kDa proteinpsbB PSII no origina…	719	2	80.1335	2.38527	359	3.66667	324.191	1.02546

## Sheet: photosynthesis-light harvesting
	NAME	DESCRIPTION	M−Fn−L	M−Fn−R	D−Fn−L	D−Fn−R	M−Ly−L	M−Ly−R	D−Ly−L	D−Ly−R
Lus10001169	PS.lightreaction.photosystem II.LHC-II	moderately similar to ( 438) AT3G27690 | Symbols: LHCB2.4, LHCB2.3, LHCB2 | LHCB2.3; chlorophyll binding | chr3:10256002-10256921 FORWARDmoderately similar to ( 453) CB21_GOSHI Chlorophyll a-b binding protein 151, chloroplast precursor (LHCII type II CAB-151) (LHCP) - Gossypium hirsutum (Upland cotton)moderately similar to ( 427) loc_os03g39610 12003.m35304 protein chlorophyll a-b binding protein…	13.3333	2901.42	537.372	16796	65	2260.09	343.869	-2.47169
Lus10001644	PS.lightreaction.photosystem II.LHC-II	moderately similar to ( 431) AT3G47470 | Symbols: LHCA4, CAB4 | LHCA4 (LIGHT-HARVESTING CHLOROPHYLL-PROTEIN COMPLEX I SUBUNIT A4); chlorophyll binding | chr3:17493622-17494773 REVERSEmoderately similar to ( 229) CB12_PETHY Chlorophyll a-b binding protein, chloroplast precursor (LHCI type II CAB) - Petunia hybrida (Petunia)moderately similar to ( 379) loc_os08g33820 12008.m080044 protein chlorophy…	9.33333	616.49	116.175	5973.33	33.6667	1026.36	130.667	-3.26556
Lus10001741	PS.lightreaction.photosystem II.LHC-II	moderately similar to ( 436) AT3G27690 | Symbols: LHCB2.4, LHCB2.3, LHCB2 | LHCB2.3; chlorophyll binding | chr3:10256002-10256921 FORWARDmoderately similar to ( 450) CB21_GOSHI Chlorophyll a-b binding protein 151, chloroplast precursor (LHCII type II CAB-151) (LHCP) - Gossypium hirsutum (Upland cotton)moderately similar to ( 428) loc_os03g39610 12003.m35304 protein chlorophyll a-b binding protein…	182.667	3135.01	1166.35	52009	298.667	7055.61	2033.04	-3.06236
Lus10006416	PS.lightreaction.photosystem II.LHC-II	moderately similar to ( 391) AT3G61470 | Symbols: LHCA2 | LHCA2; chlorophyll binding | chr3:22745736-22747032 FORWARDmoderately similar to ( 415) CB12_PETHY Chlorophyll a-b binding protein, chloroplast precursor (LHCI type II CAB) - Petunia hybrida (Petunia)moderately similar to ( 395) loc_os07g38960 12007.m29236 protein chlorophyll a-b binding protein, chloroplast precursor, putative, expressedC…	13.3333	1713.59	174.443	19594	68.6667	3406.33	173.212	-3.17179
Lus10007362	PS.lightreaction.photosystem II.LHC-II	moderately similar to ( 360) AT3G27690 | Symbols: LHCB2.4, LHCB2.3, LHCB2 | LHCB2.3; chlorophyll binding | chr3:10256002-10256921 FORWARDmoderately similar to ( 385) CB2A_SPIOL Chlorophyll a-b binding protein, chloroplast precursor (LHCII type I CAB) (LHCP) - Spinacia oleracea (Spinach)moderately similar to ( 378) loc_os01g52240 12001.m11398 protein chlorophyll a-b binding protein 2, chloroplast …	1.33333	4.80036	1.36173	4052	5.66667	13.5459	2.05855	-9.03814
Lus10008191	PS.lightreaction.photosystem II.LHC-II	moderately similar to ( 418) AT1G29930 | Symbols: CAB1, AB140, CAB140, LHCB1.3 | CAB1 (CHLOROPHYLL A/B BINDING PROTEIN 1); chlorophyll binding | chr1:10478071-10478874 FORWARDmoderately similar to ( 455) CB24_TOBAC Chlorophyll a-b binding protein 40, chloroplast precursor (LHCII type I CAB-40) (LHCP) - Nicotiana tabacum (Common tobacco)moderately similar to ( 429) loc_os01g41710 12001.m42672 prot…	2.33333	19.1707	29.908	1386	2.66667	39.3205	22.6631	-6.96482
Lus10008594	PS.lightreaction.photosystem II.LHC-II	moderately similar to ( 420) AT1G29930 | Symbols: CAB1, AB140, CAB140, LHCB1.3 | CAB1 (CHLOROPHYLL A/B BINDING PROTEIN 1); chlorophyll binding | chr1:10478071-10478874 FORWARDmoderately similar to ( 456) CB24_TOBAC Chlorophyll a-b binding protein 40, chloroplast precursor (LHCII type I CAB-40) (LHCP) - Nicotiana tabacum (Common tobacco)moderately similar to ( 432) loc_os09g17740 12009.m05032 prot…	14.6667	103.472	94.7636	7357.33	33.6667	204.798	70.8253	-6.08065
Lus10011361	PS.lightreaction.photosystem II.LHC-II	moderately similar to ( 400) AT3G61470 | Symbols: LHCA2 | LHCA2; chlorophyll binding | chr3:22745736-22747032 FORWARDmoderately similar to ( 430) CB12_PETHY Chlorophyll a-b binding protein, chloroplast precursor (LHCI type II CAB) - Petunia hybrida (Petunia)moderately similar to ( 402) loc_os07g38960 12007.m29236 protein chlorophyll a-b binding protein, chloroplast precursor, putative, expressedC…	9	1468.42	87.2714	18214.7	52	2965.02	86.1736	-3.28418
Lus10012297	PS.lightreaction.photosystem II.LHC-II	moderately similar to ( 406) AT1G61520 | Symbols: LHCA3 | LHCA3; chlorophyll binding | chr1:22700493-22701149 FORWARDweakly similar to ( 147) CB12_PETHY Chlorophyll a-b binding protein, chloroplast precursor (LHCI type II CAB) - Petunia hybrida (Petunia)moderately similar to ( 365) loc_os02g10390 12002.m33354 protein chlorophyll a-b binding protein 8, chloroplast precursor, putative, expressedChl…	66.3333	10963.5	253.499	12172.7	75.6667	10237.8	200.769	0.0577981
Lus10013778	PS.lightreaction.photosystem II.LHC-II	moderately similar to ( 385) AT4G10340 | Symbols: LHCB5 | LHCB5 (LIGHT HARVESTING COMPLEX OF PHOTOSYSTEM II 5); chlorophyll binding | chr4:6408200-6409496 FORWARDweakly similar to ( 194) CB2B_PINSY Chlorophyll a-b binding protein type 2 member 1B, chloroplast precursor (Chlorophyll a-b binding protein type II 1B) (CAB) (LHCP) - Pinus sylvestris (Scots pine)moderately similar to ( 387) loc_os11g13…	48.6667	1035.2	371.338	29323	120	2098.27	458.488	-4.63956
Lus10015235	PS.lightreaction.photosystem II.LHC-II	moderately similar to ( 448) AT1G76570 | Symbols: | chlorophyll A-B binding family protein | chr1:28729132-28730754 FORWARDmoderately similar to ( 211) CB23_TOBAC Chlorophyll a-b binding protein 36, chloroplast precursor (LHCII type I CAB-36) (LHCP) - Nicotiana tabacum (Common tobacco)moderately similar to ( 406) loc_os09g12540 12009.m04517 protein chlorophyll a-b binding protein, chloroplast pre…	89.6667	917.046	204.556	690	72	761.011	260.158	0.365118
Lus10015831	PS.lightreaction.photosystem II.LHC-II	moderately similar to ( 355) AT1G15820 | Symbols: LHCB6, CP24 | LHCB6 (LIGHT HARVESTING COMPLEX PSII SUBUNIT 6); chlorophyll binding | chr1:5446685-5447676 REVERSEmoderately similar to ( 343) CB4_SPIOL Chlorophyll a-b binding protein CP24, chloroplast precursor - Spinacia oleracea (Spinach)moderately similar to ( 354) loc_os04g38410 12004.m08831 protein chlorophyll a-b binding protein CP24, chlor…	5.33333	169.92	23.8691	4692	18.3333	386.037	20.5613	-4.26223
Lus10015834	PS.lightreaction.photosystem II.LHC-II	moderately similar to ( 348) AT1G15820 | Symbols: LHCB6, CP24 | LHCB6 (LIGHT HARVESTING COMPLEX PSII SUBUNIT 6); chlorophyll binding | chr1:5446685-5447676 REVERSEmoderately similar to ( 340) CB4_SPIOL Chlorophyll a-b binding protein CP24, chloroplast precursor - Spinacia oleracea (Spinach)moderately similar to ( 349) loc_os04g38410 12004.m08831 protein chlorophyll a-b binding protein CP24, chlor…	4	55.185	35.3784	2846.33	15.3333	43.6881	29.3085	-5.36842
Lus10016074	PS.lightreaction.photosystem II.LHC-II	moderately similar to ( 406) AT1G61520 | Symbols: LHCA3 | LHCA3; chlorophyll binding | chr1:22700493-22701149 FORWARDweakly similar to ( 147) CB12_PETHY Chlorophyll a-b binding protein, chloroplast precursor (LHCI type II CAB) - Petunia hybrida (Petunia)moderately similar to ( 365) loc_os02g10390 12002.m33354 protein chlorophyll a-b binding protein 8, chloroplast precursor, putative, expressedChl…	50.3333	4804.45	166.852	14623.7	91	4036.03	138.092	-1.32583
Lus10020415	TCA / org transformation.carbonic anhydrases	moderately similar to ( 381) AT1G15820 | Symbols: LHCB6, CP24 | LHCB6 (LIGHT HARVESTING COMPLEX PSII SUBUNIT 6); chlorophyll binding | chr1:5446685-5447676 REVERSEmoderately similar to ( 363) CB4_SPIOL Chlorophyll a-b binding protein CP24, chloroplast precursor - Spinacia oleracea (Spinach)moderately similar to ( 379) loc_os04g38410 12004.m08831 protein chlorophyll a-b binding protein CP24, chlor…	138.667	853.566	160.829	4463.67	194	769.268	185.687	-1.83043
Lus10020417	not assigned.unknown	no original description	3.66667	22.5946	5.79056	464.667	3.66667	52.8257	3.07255	-3.79501
Lus10020418	PS.lightreaction.photosystem II.LHC-II	moderately similar to ( 229) AT1G15820 | Symbols: LHCB6, CP24 | LHCB6 (LIGHT HARVESTING COMPLEX PSII SUBUNIT 6); chlorophyll binding | chr1:5446685-5447676 REVERSEmoderately similar to ( 221) CB4_SPIOL Chlorophyll a-b binding protein CP24, chloroplast precursor - Spinacia oleracea (Spinach)moderately similar to ( 238) loc_os04g38410 12004.m08831 protein chlorophyll a-b binding protein CP24, chlor…	3.33333	33.5854	12.2772	807.667	8.33333	76.1823	8.88091	-4.20946
Lus10021663	PS.lightreaction.photosystem II.LHC-II	moderately similar to ( 409) AT3G47470 | Symbols: LHCA4, CAB4 | LHCA4 (LIGHT-HARVESTING CHLOROPHYLL-PROTEIN COMPLEX I SUBUNIT A4); chlorophyll binding | chr3:17493622-17494773 REVERSEmoderately similar to ( 217) CB12_PETHY Chlorophyll a-b binding protein, chloroplast precursor (LHCI type II CAB) - Petunia hybrida (Petunia)moderately similar to ( 358) loc_os08g33820 12008.m080044 protein chlorophy…	22.3333	1279.32	196.241	14482.3	48.6667	2188.16	212.298	-3.53973
Lus10021730	PS.lightreaction.photosystem II.LHC-II	moderately similar to ( 283) AT1G45474 | Symbols: LHCA5 | LHCA5; pigment binding | chr1:17179353-17180439 FORWARDweakly similar to ( 150) CB12_PETHY Chlorophyll a-b binding protein, chloroplast precursor (LHCI type II CAB) - Petunia hybrida (Petunia)moderately similar to ( 257) loc_os02g52650 12002.m10295 protein chlorophyll a-b binding protein 4, chloroplast precursor, putative, expressedChloroa…	2.66667	40.7859	9.9098	252.667	3	136.091	8.21769	-2.30585
Lus10023320	PS.lightreaction.photosystem II.LHC-II	weakly similar to ( 173) AT2G34430 | Symbols: LHB1B1, LHCB1.4 | LHB1B1; chlorophyll binding | chr2:14524818-14525618 FORWARDweakly similar to ( 189) CB2A_SPIOL Chlorophyll a-b binding protein, chloroplast precursor (LHCII type I CAB) (LHCP) - Spinacia oleracea (Spinach)weakly similar to ( 188) loc_os01g52240 12001.m11398 protein chlorophyll a-b binding protein 2, chloroplast precursor, putative, …	93	127.766	264.087	5195.67	75.3333	303.779	414.845	-5.20485
Lus10023321	PS.lightreaction.photosystem II.LHC-II	weakly similar to ( 147) AT1G29920 | Symbols: CAB2, AB165, LHCB1.1 | CAB2 (CHLOROPHYLL A/B-BINDING PROTEIN 2); chlorophyll binding | chr1:10475089-10475892 REVERSEweakly similar to ( 164) CB24_TOBAC Chlorophyll a-b binding protein 40, chloroplast precursor (LHCII type I CAB-40) (LHCP) - Nicotiana tabacum (Common tobacco)weakly similar to ( 145) loc_os01g41710 12001.m42672 protein chlorophyll a-b …	207.333	495.034	716.584	16364.3	233.667	1085.25	755.088	-4.52274
Lus10023322	PS.lightreaction.photosystem II.LHC-II	moderately similar to ( 251) AT1G29920 | Symbols: CAB2, AB165, LHCB1.1 | CAB2 (CHLOROPHYLL A/B-BINDING PROTEIN 2); chlorophyll binding | chr1:10475089-10475892 REVERSEmoderately similar to ( 283) CB24_TOBAC Chlorophyll a-b binding protein 40, chloroplast precursor (LHCII type I CAB-40) (LHCP) - Nicotiana tabacum (Common tobacco)moderately similar to ( 258) loc_os09g17740 12009.m05032 protein chlo…	119.333	2793.41	1137.74	39967.7	366	4540.38	654.84	-3.66636
Lus10023509	PS.lightreaction.photosystem II.LHC-II	moderately similar to ( 350) AT3G54890 | Symbols: LHCA1 | LHCA1; chlorophyll binding | chr3:20339881-20340922 REVERSEweakly similar to ( 134) CB21_SINAL Chlorophyll a-b binding protein 1, chloroplast precursor (LHCII type I CAB-1) (LHCP) - Sinapis alba (White mustard) (Brassica hirta)moderately similar to ( 363) loc_os06g21590 12006.m32064 protein chlorophyll a-b binding protein 6A, chloroplast p…	80.3333	1818.94	399.381	20999.3	153.333	3231.14	474.85	-3.42681
Lus10027649	PS.lightreaction.photosystem I.LHC-I	weakly similar to ( 181) AT1G19150 | Symbols: LHCA6, LHCA2*1 | LHCA6; chlorophyll binding | chr1:6612806-6613799 FORWARDweakly similar to ( 149) CB12_PETHY Chlorophyll a-b binding protein, chloroplast precursor (LHCI type II CAB) - Petunia hybrida (Petunia)weakly similar to ( 159) loc_os09g26810 12009.m05833 protein chlorophyll a-b binding protein, chloroplast precursor, putative, expressedChloro…	1	17.1301	1.70979	151	1	22.0106	3.09164	-2.70438
Lus10027786	PS.lightreaction.photosystem II.LHC-II	moderately similar to ( 205) AT3G08940 | Symbols: LHCB4.2 | LHCB4.2 (light harvesting complex PSII); chlorophyll binding | chr3:2717717-2718665 FORWARDweakly similar to ( 116) CB29_CHLRE Chlorophyll a-b binding protein CP29 - Chlamydomonas reinhardtiimoderately similar to ( 208) loc_os07g37240 12007.m29225 protein expressed proteinChloroa_b-bind no original description	18.3333	671.598	95.5506	9000.33	56	1520.27	94.1657	-3.50121
Lus10027966	PS.lightreaction.photosystem II.LHC-II	moderately similar to ( 410) AT1G29930 | Symbols: CAB1, AB140, CAB140, LHCB1.3 | CAB1 (CHLOROPHYLL A/B BINDING PROTEIN 1); chlorophyll binding | chr1:10478071-10478874 FORWARDmoderately similar to ( 446) CB24_TOBAC Chlorophyll a-b binding protein 40, chloroplast precursor (LHCII type I CAB-40) (LHCP) - Nicotiana tabacum (Common tobacco)moderately similar to ( 422) loc_os01g41710 12001.m42672 prot…	2.33333	4.80036	4.41171	2503	4	8.47654	11.3309	-8.57786
Lus10028299	PS.lightreaction.photosystem II.LHC-II	moderately similar to ( 402) AT2G40100 | Symbols: LHCB4.3 | LHCB4.3 (light harvesting complex PSII); chlorophyll binding | chr2:16745884-16747190 FORWARDmoderately similar to ( 243) CB29_CHLRE Chlorophyll a-b binding protein CP29 - Chlamydomonas reinhardtiimoderately similar to ( 357) loc_os07g37240 12007.m29225 protein expressed proteinChloroa_b-bind no original description	28.6667	667.945	36.2433	4763.67	21.6667	1161.42	23.2412	-2.4247
Lus10035512	PS.lightreaction.photosystem II.LHC-II	moderately similar to ( 437) AT3G08940 | Symbols: LHCB4.2 | LHCB4.2 (light harvesting complex PSII); chlorophyll binding | chr3:2717717-2718665 FORWARDmoderately similar to ( 246) CB29_CHLRE Chlorophyll a-b binding protein CP29 - Chlamydomonas reinhardtiimoderately similar to ( 424) loc_os07g37240 12007.m29225 protein expressed proteinChloroa_b-bind no original description	80	2379.1	429.397	25068.3	164.667	4395.92	438.386	-3.12703
Lus10037836	PS.lightreaction.photosystem II.LHC-II	moderately similar to ( 386) AT2G40100 | Symbols: LHCB4.3 | LHCB4.3 (light harvesting complex PSII); chlorophyll binding | chr2:16745884-16747190 FORWARDmoderately similar to ( 241) CB29_CHLRE Chlorophyll a-b binding protein CP29 - Chlamydomonas reinhardtiimoderately similar to ( 337) loc_os07g37240 12007.m29225 protein expressed proteinChloroa_b-bind no original description	144.333	79.8606	54.2128	110.667	174.667	75.9236	53.2605	-0.348312
Lus10037875	PS.lightreaction.photosystem II.LHC-II	moderately similar to ( 448) AT5G54270 | Symbols: LHCB3, LHCB3*1 | LHCB3 (LIGHT-HARVESTING CHLOROPHYLL B-BINDING PROTEIN 3); structural molecule | chr5:22038424-22039383 FORWARDmoderately similar to ( 434) CB23_HORVU Chlorophyll a-b binding protein of LHCII type III, chloroplast precursor (CAB) - Hordeum vulgare (Barley)moderately similar to ( 446) loc_os07g37550 12007.m079717 protein chlorophyll…	8.66667	189.769	39.9165	3894	17.6667	307.468	38.734	-3.90862
Lus10038489	PS.lightreaction.photosystem II.LHC-II	moderately similar to ( 290) AT3G27690 | Symbols: LHCB2.4, LHCB2.3, LHCB2 | LHCB2.3; chlorophyll binding | chr3:10256002-10256921 FORWARDmoderately similar to ( 311) CB2A_SPIOL Chlorophyll a-b binding protein, chloroplast precursor (LHCII type I CAB) (LHCP) - Spinacia oleracea (Spinach)moderately similar to ( 305) loc_os01g52240 12001.m11398 protein chlorophyll a-b binding protein 2, chloroplast …	68.6667	1605.4	556.188	27981.7	205.333	1933.07	558.738	-4.11219
Lus10038490	PS.lightreaction.photosystem II.LHC-II	moderately similar to ( 313) AT1G29920 | Symbols: CAB2, AB165, LHCB1.1 | CAB2 (CHLOROPHYLL A/B-BINDING PROTEIN 2); chlorophyll binding | chr1:10475089-10475892 REVERSEmoderately similar to ( 347) CB24_TOBAC Chlorophyll a-b binding protein 40, chloroplast precursor (LHCII type I CAB-40) (LHCP) - Nicotiana tabacum (Common tobacco)moderately similar to ( 320) loc_os01g41710 12001.m42672 protein chlo…	17.6667	28.4303	64.0009	2141.33	24.6667	95.1611	82.5175	-6.15308
Lus10038575	PS.lightreaction.photosystem II.LHC-II	moderately similar to ( 448) AT5G54270 | Symbols: LHCB3, LHCB3*1 | LHCB3 (LIGHT-HARVESTING CHLOROPHYLL B-BINDING PROTEIN 3); structural molecule | chr5:22038424-22039383 FORWARDmoderately similar to ( 434) CB23_HORVU Chlorophyll a-b binding protein of LHCII type III, chloroplast precursor (CAB) - Hordeum vulgare (Barley)moderately similar to ( 446) loc_os07g37550 12007.m079717 protein chlorophyll…	116.333	455.445	350.873	5459	113.667	784.844	352.503	-3.34275
Lus10039156	PS.lightreaction.photosystem II.LHC-II	moderately similar to ( 387) AT4G10340 | Symbols: LHCB5 | LHCB5 (LIGHT HARVESTING COMPLEX OF PHOTOSYSTEM II 5); chlorophyll binding | chr4:6408200-6409496 FORWARDweakly similar to ( 194) CB2B_PINSY Chlorophyll a-b binding protein type 2 member 1B, chloroplast precursor (Chlorophyll a-b binding protein type II 1B) (CAB) (LHCP) - Pinus sylvestris (Scots pine)moderately similar to ( 385) loc_os11g13…	22	1769.04	240.619	26323	87.3333	2789.56	236.177	-3.72875
Lus10039912	PS.lightreaction.photosystem II.LHC-II	moderately similar to ( 354) AT1G19150 | Symbols: LHCA6, LHCA2*1 | LHCA6; chlorophyll binding | chr1:6612806-6613799 FORWARDmoderately similar to ( 290) CB12_PETHY Chlorophyll a-b binding protein, chloroplast precursor (LHCI type II CAB) - Petunia hybrida (Petunia)moderately similar to ( 321) loc_os09g26810 12009.m05833 protein chlorophyll a-b binding protein, chloroplast precursor, putative, exp…	2.66667	142.858	7.86271	1182.33	4.33333	282.744	6.52133	-2.382
Lus10040391	PS.lightreaction.photosystem II.LHC-II	moderately similar to ( 353) AT3G54890 | Symbols: LHCA1 | LHCA1; chlorophyll binding | chr3:20339881-20340922 REVERSEweakly similar to ( 134) CB21_SINAL Chlorophyll a-b binding protein 1, chloroplast precursor (LHCII type I CAB-1) (LHCP) - Sinapis alba (White mustard) (Brassica hirta)moderately similar to ( 367) loc_os06g21590 12006.m32064 protein chlorophyll a-b binding protein 6A, chloroplast p…	23	1745.6	158.375	18527	89	3160.58	153.644	-3.38085
Lus10042219	PS.lightreaction.photosystem II.LHC-II	moderately similar to ( 420) AT1G29930 | Symbols: CAB1, AB140, CAB140, LHCB1.3 | CAB1 (CHLOROPHYLL A/B BINDING PROTEIN 1); chlorophyll binding | chr1:10478071-10478874 FORWARDmoderately similar to ( 455) CB24_TOBAC Chlorophyll a-b binding protein 40, chloroplast precursor (LHCII type I CAB-40) (LHCP) - Nicotiana tabacum (Common tobacco)moderately similar to ( 434) loc_os09g17740 12009.m05032 prot…	230	744.241	847.614	16136.7	236.667	1743.49	1178.35	-4.3018
Lus10042657	PS.lightreaction.photosystem II.LHC-II	moderately similar to ( 283) AT1G45474 | Symbols: LHCA5 | LHCA5; pigment binding | chr1:17179353-17180439 FORWARDweakly similar to ( 150) CB12_PETHY Chlorophyll a-b binding protein, chloroplast precursor (LHCI type II CAB) - Petunia hybrida (Petunia)moderately similar to ( 257) loc_os02g52650 12002.m10295 protein chlorophyll a-b binding protein 4, chloroplast precursor, putative, expressedChloroa…	3.66667	29.4497	5.81209	328.667	4.66667	112.692	6.52133	-3.02858

## Sheet: proline
	NAME	DESCRIPTION	M−Fn−L	M−Fn−R	D−Fn−L	D−Fn−R	M−Ly−L	M−Ly−R	D−Ly−L	D−Ly−R
Lus10001016	amino acid metabolism.synthesis.glutamate family.proline.delta 1-pyrroline-5-carboxylate synthetase	moderately similar to ( 457) AT3G55610 | Symbols: P5CS2 | P5CS2 (DELTA 1-PYRROLINE-5-CARBOXYLATE SYNTHASE 2); catalytic/ glutamate 5-kinase/ oxidoreductase | chr3:20625005-20628989 REVERSEmoderately similar to ( 457) P5CS_ACTCH Delta 1-pyrroline-5-carboxylate synthetase (P5CS) [Includes: Glutamate 5-kinase (EC 2.7.2.11) (Gamma-glutamyl kinase) (GK); Gamma-glutamyl phosphate reductase (GPR) (EC 1.…	144.333	359	1351.47	216.475	122.333	248.667	1461.4	189.996
Lus10001018	amino acid metabolism.synthesis.glutamate family.proline	highly similar to ( 507) AT2G39800 | Symbols: P5CS1, ATP5CS | P5CS1 (DELTA1-PYRROLINE-5-CARBOXYLATE SYNTHASE 1); delta1-pyrroline-5-carboxylate synthetase | chr2:16598516-16602939 REVERSEhighly similar to ( 508) P5CS_ACTCH Delta 1-pyrroline-5-carboxylate synthetase (P5CS) [Includes: Glutamate 5-kinase (EC 2.7.2.11) (Gamma-glutamyl kinase) (GK); Gamma-glutamyl phosphate reductase (GPR) (EC 1.2.1.4…	85.3333	173.333	1012.38	102.797	66.6667	168.333	1085.66	96.6841
Lus10001019	amino acid metabolism.synthesis.glutamate family.proline	moderately similar to ( 429) AT2G39800 | Symbols: P5CS1, ATP5CS | P5CS1 (DELTA1-PYRROLINE-5-CARBOXYLATE SYNTHASE 1); delta1-pyrroline-5-carboxylate synthetase | chr2:16598516-16602939 REVERSEmoderately similar to ( 452) P5CS_ACTCH Delta 1-pyrroline-5-carboxylate synthetase (P5CS) [Includes: Glutamate 5-kinase (EC 2.7.2.11) (Gamma-glutamyl kinase) (GK); Gamma-glutamyl phosphate reductase (GPR) (EC…	191.667	396	2720.31	229.202	173	398	2642.58	145.982
Lus10004696	amino acid metabolism.synthesis.glutamate family.proline	moderately similar to ( 435) AT2G39800 | Symbols: P5CS1, ATP5CS | P5CS1 (DELTA1-PYRROLINE-5-CARBOXYLATE SYNTHASE 1); delta1-pyrroline-5-carboxylate synthetase | chr2:16598516-16602939 REVERSEmoderately similar to ( 476) P5CS_ACTCH Delta 1-pyrroline-5-carboxylate synthetase (P5CS) [Includes: Glutamate 5-kinase (EC 2.7.2.11) (Gamma-glutamyl kinase) (GK); Gamma-glutamyl phosphate reductase (GPR) (EC…	250.667	25.3333	11735.7	35.4968	103.667	42.6667	11504.4	10.2686
Lus10004697	amino acid metabolism.synthesis.glutamate family.proline.delta 1-pyrroline-5-carboxylate synthetase	moderately similar to ( 473) AT3G55610 | Symbols: P5CS2 | P5CS2 (DELTA 1-PYRROLINE-5-CARBOXYLATE SYNTHASE 2); catalytic/ glutamate 5-kinase/ oxidoreductase | chr3:20625005-20628989 REVERSEmoderately similar to ( 465) P5CS_ACTCH Delta 1-pyrroline-5-carboxylate synthetase (P5CS) [Includes: Glutamate 5-kinase (EC 2.7.2.11) (Gamma-glutamyl kinase) (GK); Gamma-glutamyl phosphate reductase (GPR) (EC 1.…	314.667	51.3333	7961.34	43.2714	94.6667	44.6667	8201.71	16.7517
Lus10019103	amino acid metabolism.synthesis.glutamate family.proline	moderately similar to ( 349) AT5G14800 | Symbols: P5CR, AT-P5R, AT-P5C1, EMB2772 | P5CR (PYRROLINE-5- CARBOXYLATE (P5C) REDUCTASE); pyrroline-5-carboxylate reductase | chr5:4786353-4787618 REVERSEmoderately similar to ( 360) P5CR_ACTCH Pyrroline-5-carboxylate reductase (EC 1.5.1.2) (P5CR) (P5C reductase) - Actinidia chinensis (Kiwi) (Yangtao)moderately similar to ( 302) loc_os01g71990 12001.m1323…	172	206.333	1869.2	153.406	213	187.333	2434.83	151.71
Lus10030158	amino acid metabolism.synthesis.glutamate family.proline	highly similar to ( 953) AT2G39800 | Symbols: P5CS1, ATP5CS | P5CS1 (DELTA1-PYRROLINE-5-CARBOXYLATE SYNTHASE 1); delta1-pyrroline-5-carboxylate synthetase | chr2:16598516-16602939 REVERSEhighly similar to ( 985) P5CS_ACTCH Delta 1-pyrroline-5-carboxylate synthetase (P5CS) [Includes: Glutamate 5-kinase (EC 2.7.2.11) (Gamma-glutamyl kinase) (GK); Gamma-glutamyl phosphate reductase (GPR) (EC 1.2.1.4…	334.667	556	1074.8	647.917	301.333	547.333	1089.7	511.913
Lus10034453	amino acid metabolism.synthesis.glutamate family.proline	moderately similar to ( 312) AT5G14800 | Symbols: P5CR, AT-P5R, AT-P5C1, EMB2772 | P5CR (PYRROLINE-5- CARBOXYLATE (P5C) REDUCTASE); pyrroline-5-carboxylate reductase | chr5:4786353-4787618 REVERSEmoderately similar to ( 319) P5CR_PEA Pyrroline-5-carboxylate reductase (EC 1.5.1.2) (P5CR) (P5C reductase) - Pisum sativum (Garden pea)moderately similar to ( 266) loc_os01g71990 12001.m13237 protein py…	169.667	177.333	947.611	102.016	179.333	144.667	1015.91	109.171
Lus10040262	amino acid metabolism.synthesis.glutamate family.proline	moderately similar to ( 419) AT2G39800 | Symbols: P5CS1, ATP5CS | P5CS1 (DELTA1-PYRROLINE-5-CARBOXYLATE SYNTHASE 1); delta1-pyrroline-5-carboxylate synthetase | chr2:16598516-16602939 REVERSEmoderately similar to ( 457) P5CS_ACTCH Delta 1-pyrroline-5-carboxylate synthetase (P5CS) [Includes: Glutamate 5-kinase (EC 2.7.2.11) (Gamma-glutamyl kinase) (GK); Gamma-glutamyl phosphate reductase (GPR) (EC…	19.6667	8.66667	1833.41	4.44224	7.33333	8.66667	1963.48	2.39019
Lus10040263	amino acid metabolism.synthesis.glutamate family.proline.delta 1-pyrroline-5-carboxylate synthetase	moderately similar to ( 439) AT3G55610 | Symbols: P5CS2 | P5CS2 (DELTA 1-PYRROLINE-5-CARBOXYLATE SYNTHASE 2); catalytic/ glutamate 5-kinase/ oxidoreductase | chr3:20625005-20628989 REVERSEmoderately similar to ( 431) P5CS_ACTCH Delta 1-pyrroline-5-carboxylate synthetase (P5CS) [Includes: Glutamate 5-kinase (EC 2.7.2.11) (Gamma-glutamyl kinase) (GK); Gamma-glutamyl phosphate reductase (GPR) (EC 1.…	27	10.3333	2583.78	11.2886	13	9.33333	2724.17	3.42969
Lus10040264	amino acid metabolism.synthesis.glutamate family.proline.delta 1-pyrroline-5-carboxylate synthetase	moderately similar to ( 459) AT3G55610 | Symbols: P5CS2 | P5CS2 (DELTA 1-PYRROLINE-5-CARBOXYLATE SYNTHASE 2); catalytic/ glutamate 5-kinase/ oxidoreductase | chr3:20625005-20628989 REVERSEmoderately similar to ( 451) P5CS_ACTCH Delta 1-pyrroline-5-carboxylate synthetase (P5CS) [Includes: Glutamate 5-kinase (EC 2.7.2.11) (Gamma-glutamyl kinase) (GK); Gamma-glutamyl phosphate reductase (GPR) (EC 1.…	281.333	177.667	14395.3	143.63	171.667	190.333	15700.6	132.344
