# Supplementary material for: Evaluation of Differentially Expressed Genes in Leaves vs. Roots Subjected to Drought Stress in Flax (Linum usitatissimum L.)
Source: Int J Mol Sci. 2023 Jul 27;24(15):12019. doi: 10.3390/ijms241512019 (PMC10419004; doi:10.3390/ijms241512019)
Supplement: Supplementary file 1 [file ijms-24-12019-s001.zip › Supplementary Table S5.xlsx]

## Sheet: lignin
	NAME	DESCRIPTION	M−Fn−L	M−Fn−R	D−Fn−L	D−Fn−R	M−Ly−L	M−Ly−R	D−Ly−L	D−Ly−R
Lus10040416	secondary metabolism.phenylpropanoids.lignin biosynthesis.PAL	nearly identical (1159) AT2G37040 | Symbols: pal1, ATPAL1 | pal1 (Phe ammonia lyase 1); phenylalanine ammonia-lyase | chr2:15557602-15560237 REVERSEnearly identical (1192) PAL1_TOBAC Phenylalanine ammonia-lyase (EC 4.3.1.5) - Nicotiana tabacum (Common tobacco)nearly identical (1083) loc_os02g41650 12002.m33781 protein phenylalanine ammonia-lyase, putative, expressed PAL PAL-HAL HutH PRK09367 no o…	2054	19896	669.608	26029.9	1578.67	23258	919.93	31768.8
Lus10026518	secondary metabolism.phenylpropanoids.lignin biosynthesis.PAL	nearly identical (1201) AT2G37040 | Symbols: pal1, ATPAL1 | pal1 (Phe ammonia lyase 1); phenylalanine ammonia-lyase | chr2:15557602-15560237 REVERSEnearly identical (1217) PAL1_SOYBN Phenylalanine ammonia-lyase 1 (EC 4.3.1.5) - Glycine max (Soybean)nearly identical (1092) loc_os04g43800 12004.m09339 protein phenylalanine ammonia-lyase, putative, expressed PAL PAL-HAL HutH PRK09367 no original des…	676.667	7059	237.119	7413.6	777.667	8338.67	343.169	9214.28
Lus10013805	secondary metabolism.phenylpropanoids.lignin biosynthesis.PAL	nearly identical (1192) AT2G37040 | Symbols: pal1, ATPAL1 | pal1 (Phe ammonia lyase 1); phenylalanine ammonia-lyase | chr2:15557602-15560237 REVERSEnearly identical (1206) PAL1_SOYBN Phenylalanine ammonia-lyase 1 (EC 4.3.1.5) - Glycine max (Soybean)nearly identical (1093) loc_os02g41650 12002.m33781 protein phenylalanine ammonia-lyase, putative, expressed PAL PAL-HAL HutH PRK09367 no original des…	1387.33	5623.67	469.874	6407.74	2201	6140	700.793	8177.16
Lus10034449	misc.cytochrome P450	highly similar to ( 814) AT2G30490 | Symbols: ATC4H, C4H, CYP73A5 | C4H (CINNAMATE-4-HYDROXYLASE); trans-cinnamate 4-monooxygenase | chr2:12993861-12995683 REVERSEhighly similar to ( 840) TCMO_SOYBN Trans-cinnamate 4-monooxygenase (EC 1.14.13.11) (Cinnamic acid 4-hydroxylase) (CA4H) (C4H) (P450C4H) (Cytochrome P450 73) - Glycine max (Soybean)highly similar to ( 715) loc_os05g25640 12005.m06857 pr…	681.667	3959	241.148	2492.86	809.667	3618.67	198.9	1896.79
Lus10021671	misc.cytochrome P450	highly similar to ( 689) AT2G30490 | Symbols: ATC4H, C4H, CYP73A5 | C4H (CINNAMATE-4-HYDROXYLASE); trans-cinnamate 4-monooxygenase | chr2:12993861-12995683 REVERSEhighly similar to ( 699) TCMO_SOYBN Trans-cinnamate 4-monooxygenase (EC 1.14.13.11) (Cinnamic acid 4-hydroxylase) (CA4H) (C4H) (P450C4H) (Cytochrome P450 73) - Glycine max (Soybean)highly similar to ( 625) loc_os05g25640 12005.m06857 pr…	1045.33	9466.33	8367.7	11491.2	1064.67	10111	9709.48	15647.2
Lus10035011	misc.cytochrome P450	highly similar to ( 756) AT2G30490 | Symbols: ATC4H, C4H, CYP73A5 | C4H (CINNAMATE-4-HYDROXYLASE); trans-cinnamate 4-monooxygenase | chr2:12993861-12995683 REVERSEhighly similar to ( 795) TCMO_SOYBN Trans-cinnamate 4-monooxygenase (EC 1.14.13.11) (Cinnamic acid 4-hydroxylase) (CA4H) (C4H) (P450C4H) (Cytochrome P450 73) - Glycine max (Soybean)highly similar to ( 686) loc_os05g25640 12005.m06857 pr…	2087	10057.7	18406	12250.3	2393.33	11942.7	20395.7	12385
Lus10027598	misc.cytochrome P450	highly similar to ( 567) AT2G30490 | Symbols: ATC4H, C4H, CYP73A5 | C4H (CINNAMATE-4-HYDROXYLASE); trans-cinnamate 4-monooxygenase | chr2:12993861-12995683 REVERSEhighly similar to ( 607) TCMO_SOYBN Trans-cinnamate 4-monooxygenase (EC 1.14.13.11) (Cinnamic acid 4-hydroxylase) (CA4H) (C4H) (P450C4H) (Cytochrome P450 73) - Glycine max (Soybean)highly similar to ( 699) loc_os02g26810 12002.m07825 pr…	2.66667	10308.7	29.8242	4149.01	1.66667	7912.67	41.9971	3613.31
Lus10026143	secondary metabolism.phenylpropanoids.lignin biosynthesis.4CL	highly similar to ( 802) AT1G51680 | Symbols: 4CL1, 4CL.1, AT4CL1 | 4CL1 (4-COUMARATE:COA LIGASE 1); 4-coumarate-CoA ligase | chr1:19159080-19161464 REVERSEhighly similar to ( 818) 4CL1_TOBAC 4-coumarate--CoA ligase 1 (EC 6.2.1.12) (4CL 1) (4-coumaroyl-CoA synthase 1) - Nicotiana tabacum (Common tobacco)highly similar to ( 713) loc_os02g08100 12002.m06156 protein 4-coumarate--CoA ligase 1, putati…	1665.67	3037.67	3223.1	4337.17	1381	3520.33	4000.19	4969.11
Lus10002791	secondary metabolism.phenylpropanoids.lignin biosynthesis.4CL	highly similar to ( 615) AT5G63380 | Symbols: | 4-coumarate--CoA ligase family protein / 4-coumaroyl-CoA synthase family protein | chr5:25387581-25390026 REVERSEmoderately similar to ( 301) 4CL1_TOBAC 4-coumarate--CoA ligase 1 (EC 6.2.1.12) (4CL 1) (4-coumaroyl-CoA synthase 1) - Nicotiana tabacum (Common tobacco)moderately similar to ( 500) loc_os01g67530 12001.m12857 protein 4-coumarate--CoA lig…	534.667	641.333	141.573	101.574	508	527	121.582	52.1227
Lus10026097	secondary metabolism.phenylpropanoids	highly similar to ( 521) AT5G48930 | Symbols: HCT | HCT (HYDROXYCINNAMOYL-COA SHIKIMATE/QUINATE HYDROXYCINNAMOYL TRANSFERASE); quinate O-hydroxycinnamoyltransferase/ shikimate O-hydroxycinnamoyltransferase/ transferase | chr5:19836654-19838092 REVERSEmoderately similar to ( 296) HCBT2_DIACA Anthranilate N-benzoyltransferase protein 2 (EC 2.3.1.144) (Anthranilate N-hydroxycinnamoyl/benzoyltransfer…	712	2820	1388.93	3399.57	632	3637.67	1973.97	5137.59
Lus10010786	secondary metabolism.phenylpropanoids	moderately similar to ( 430) AT5G48930 | Symbols: HCT | HCT (HYDROXYCINNAMOYL-COA SHIKIMATE/QUINATE HYDROXYCINNAMOYL TRANSFERASE); quinate O-hydroxycinnamoyltransferase/ shikimate O-hydroxycinnamoyltransferase/ transferase | chr5:19836654-19838092 REVERSEmoderately similar to ( 322) HCBT1_DIACA Anthranilate N-benzoyltransferase protein 1 (EC 2.3.1.144) (Anthranilate N-hydroxycinnamoyl/benzoyltran…	83	5185.33	5.13322	750.879	111.667	5153.67	14.5757	599.144
Lus10026123	secondary metabolism.phenylpropanoids	highly similar to ( 577) AT5G48930 | Symbols: HCT | HCT (HYDROXYCINNAMOYL-COA SHIKIMATE/QUINATE HYDROXYCINNAMOYL TRANSFERASE); quinate O-hydroxycinnamoyltransferase/ shikimate O-hydroxycinnamoyltransferase/ transferase | chr5:19836654-19838092 REVERSEmoderately similar to ( 358) HCBT1_DIACA Anthranilate N-benzoyltransferase protein 1 (EC 2.3.1.144) (Anthranilate N-hydroxycinnamoyl/benzoyltransfer…	4182.33	37	2179.41	27.7535	5794.67	54	1203.6	24.9376
Lus10022163	secondary metabolism.phenylpropanoids	moderately similar to ( 445) AT5G48930 | Symbols: HCT | HCT (HYDROXYCINNAMOYL-COA SHIKIMATE/QUINATE HYDROXYCINNAMOYL TRANSFERASE); quinate O-hydroxycinnamoyltransferase/ shikimate O-hydroxycinnamoyltransferase/ transferase | chr5:19836654-19838092 REVERSEmoderately similar to ( 338) HCBT2_DIACA Anthranilate N-benzoyltransferase protein 2 (EC 2.3.1.144) (Anthranilate N-hydroxycinnamoyl/benzoyltran…	458	427.333	44.5433	240.946	413	478.667	37.2897	154.93
Lus10033524	misc.cytochrome P450	highly similar to ( 868) AT2G40890 | Symbols: CYP98A3 | CYP98A3 (cytochrome P450, family 98, subfamily A, polypeptide 3); monooxygenase/ p-coumarate 3-hydroxylase | chr2:17058291-17060532 REVERSEhighly similar to ( 896) C98A2_SOYBN Cytochrome P450 98A2 (EC 1.14.-.-) - Glycine max (Soybean)highly similar to ( 715) loc_os05g41440 12005.m27896 protein cytochrome P450 98A1, putative, expressed p450 C…	212.667	3981.67	701.542	3497.63	183.667	3761.33	1056.68	2876.87
Lus10034584	secondary metabolism.phenylpropanoids.lignin biosynthesis.CCoAOMT	moderately similar to ( 271) AT1G67980 | Symbols: CCOAMT | CCoAMT; caffeoyl-CoA O-methyltransferase | chr1:25488239-25488934 FORWARDmoderately similar to ( 219) CAMT_SOLTU Caffeoyl-CoA O-methyltransferase (EC 2.1.1.104) (Trans-caffeoyl-CoA 3-O-methyltransferase) (CCoAMT) (CCoAOMT) - Solanum tuberosum (Potato)moderately similar to ( 222) loc_os06g06980 12006.m31989 protein caffeoyl-CoA O-methyltra…	2.33333	1.33333	16.7899	2.38527	1.66667	1.33333	29.4709	3.42459
Lus10024138	secondary metabolism.flavonoids.dihydroflavonols.dihydroflavonol 4-reductase	moderately similar to ( 385) AT2G33590 | Symbols: | cinnamoyl-CoA reductase family | chr2:14224622-14226365 FORWARDweakly similar to ( 191) DFRA_HORVU Dihydroflavonol-4-reductase (EC 1.1.1.219) (DFR) (Dihydrokaempferol 4-reductase) - Hordeum vulgare (Barley)moderately similar to ( 332) loc_os06g41810 12006.m08713 protein dihydroflavonol-4-reductase, putative, expressed WcaG Epimerase 3Beta_HSD no…	504.667	408.333	50.0429	321.357	497.667	372.333	40.9978	295.292
Lus10042399	secondary metabolism.flavonoids.dihydroflavonols.dihydroflavonol 4-reductase	moderately similar to ( 455) AT2G02400 | Symbols: | cinnamoyl-CoA reductase family | chr2:631413-632449 REVERSEweakly similar to ( 193) DFRA_VITVI Dihydroflavonol-4-reductase (EC 1.1.1.219) (DFR) (Dihydrokaempferol 4-reductase) - Vitis vinifera (Grape)moderately similar to ( 308) loc_os03g60380 12003.m10928 protein dihydroflavonol-4-reductase, putative, expressed WcaG Epimerase no original descri…	231.667	74	88.0699	57.9642	253.333	76.3333	49.1176	40.9726
Lus10006885	secondary metabolism.flavonoids.dihydroflavonols.dihydroflavonol 4-reductase	moderately similar to ( 414) AT2G23910 | Symbols: | cinnamoyl-CoA reductase-related | chr2:10177902-10179789 FORWARDweakly similar to ( 116) DFRA_VITVI Dihydroflavonol-4-reductase (EC 1.1.1.219) (DFR) (Dihydrokaempferol 4-reductase) - Vitis vinifera (Grape)moderately similar to ( 221) loc_os10g42620 12010.m07015 protein dihydroflavonol-4-reductase, putative, expressed no original description	76.6667	148	1712.89	39.4223	123.667	116.333	1261.49	21.8282
Lus10003780	secondary metabolism.flavonoids.dihydroflavonols.dihydroflavonol 4-reductase	moderately similar to ( 398) AT4G30470 | Symbols: | cinnamoyl-CoA reductase-related | chr4:14894263-14896506 FORWARDweakly similar to ( 102) DFRA_VITVI Dihydroflavonol-4-reductase (EC 1.1.1.219) (DFR) (Dihydrokaempferol 4-reductase) - Vitis vinifera (Grape)moderately similar to ( 222) loc_os10g42620 12010.m07015 protein dihydroflavonol-4-reductase, putative, expressed no original description	292	402	1691.43	258.271	315.667	450.667	1164.49	262.714
Lus10030973	secondary metabolism.flavonoids.dihydroflavonols.dihydroflavonol 4-reductase	moderately similar to ( 440) AT1G80820 | Symbols: CCR2, ATCCR2 | CCR2 (CINNAMOYL COA REDUCTASE); cinnamoyl-CoA reductase | chr1:30370646-30372460 FORWARDweakly similar to ( 200) DFRA_DIACA Dihydroflavonol-4-reductase (EC 1.1.1.219) (DFR) (Dihydrokaempferol 4-reductase) - Dianthus caryophyllus (Carnation) (Clove pink)moderately similar to ( 428) loc_os09g25150 12009.m22089 protein dihydroflavonol-…	5	15	12.3314	2.7208	6.33333	46.6667	2.71053	1.70146
Lus10035369	secondary metabolism.flavonoids.dihydroflavonols.dihydroflavonol 4-reductase	moderately similar to ( 436) AT1G15950 | Symbols: CCR1, IRX4, ATCCR1 | CCR1 (CINNAMOYL COA REDUCTASE 1); cinnamoyl-CoA reductase | chr1:5478855-5481949 FORWARDweakly similar to ( 197) DFRA_DIACA Dihydroflavonol-4-reductase (EC 1.1.1.219) (DFR) (Dihydrokaempferol 4-reductase) - Dianthus caryophyllus (Carnation) (Clove pink)moderately similar to ( 416) loc_os08g34280 12008.m07417 protein dihydrofla…	10.3333	94	26.3824	34.9675	14.3333	101.333	8.13159	13.9471
Lus10028361	misc.cytochrome P450	highly similar to ( 651) AT4G36220 | Symbols: FAH1, CYP84A1 | FAH1 (FERULIC ACID 5-HYDROXYLASE 1); ferulate 5-hydroxylase/ monooxygenase | chr4:17137584-17139619 REVERSEmoderately similar to ( 317) C71D8_SOYBN Cytochrome P450 71D8 (EC 1.14.-.-) (P450 CP7) - Glycine max (Soybean)highly similar to ( 528) loc_os10g36848 12010.m06490 protein cytochrome P450 84A1, putative, expressed p450 CypX no orig…	55.3333	756.667	14.7326	1534.58	35.3333	1374.33	68.9182	1968.5
Lus10041811	misc.cytochrome P450	highly similar to ( 600) AT4G36220 | Symbols: FAH1, CYP84A1 | FAH1 (FERULIC ACID 5-HYDROXYLASE 1); ferulate 5-hydroxylase/ monooxygenase | chr4:17137584-17139619 REVERSEmoderately similar to ( 288) C71D8_SOYBN Cytochrome P450 71D8 (EC 1.14.-.-) (P450 CP7) - Glycine max (Soybean)moderately similar to ( 484) loc_os10g36848 12010.m06490 protein cytochrome P450 84A1, putative, expressed p450 CypX no …	205.333	1753.67	22.2709	3562.26	182.667	2620	76.6304	3833.83
Lus10014273	misc.cytochrome P450	highly similar to ( 697) AT4G36220 | Symbols: FAH1, CYP84A1 | FAH1 (FERULIC ACID 5-HYDROXYLASE 1); ferulate 5-hydroxylase/ monooxygenase | chr4:17137584-17139619 REVERSEmoderately similar to ( 325) C71DB_LOTJA Cytochrome P450 71D11 (EC 1.14.-.-) (Fragment) - Lotus japonicushighly similar to ( 579) loc_os10g36848 12010.m06490 protein cytochrome P450 84A1, putative, expressed p450 CypX no original …	290	776.667	123.648	2792.9	258.667	1270	288.111	2660.3
Lus10012582	misc.cytochrome P450	highly similar to ( 570) AT4G36220 | Symbols: FAH1, CYP84A1 | FAH1 (FERULIC ACID 5-HYDROXYLASE 1); ferulate 5-hydroxylase/ monooxygenase | chr4:17137584-17139619 REVERSEmoderately similar to ( 286) C71D8_SOYBN Cytochrome P450 71D8 (EC 1.14.-.-) (P450 CP7) - Glycine max (Soybean)moderately similar to ( 428) loc_os03g02180 12003.m05761 protein cytochrome P450 84A1, putative, expressed p450 CypX no …	2.66667	76.6667	74.702	298.967	2.66667	91.6667	123.864	231.442
Lus10041511	misc.cytochrome P450	highly similar to ( 678) AT4G36220 | Symbols: FAH1, CYP84A1 | FAH1 (FERULIC ACID 5-HYDROXYLASE 1); ferulate 5-hydroxylase/ monooxygenase | chr4:17137584-17139619 REVERSEmoderately similar to ( 335) C71D8_SOYBN Cytochrome P450 71D8 (EC 1.14.-.-) (P450 CP7) - Glycine max (Soybean)highly similar to ( 576) loc_os10g36848 12010.m06490 protein cytochrome P450 84A1, putative, expressed p450 CypX no orig…	1	156.667	19.8788	584.936	1	253.333	36.8821	655.745
Lus10009442	misc.O-methyl transferases	moderately similar to ( 318) AT1G33030 | Symbols: | O-methyltransferase family 2 protein | chr1:11964885-11966212 REVERSEmoderately similar to ( 316) COMT1_CATRO Caffeic acid 3-O-methyltransferase (EC 2.1.1.68) (S-adenosysl-L-methionine:caffeic acid 3-O-methyltransferase) (COMT) (CAOMT) - Catharanthus roseus (Rosy periwinkle) (Madagascar periwinkle)moderately similar to ( 224) loc_os04g09654 1200…	1193.33	1762.67	2901.39	4470.05	870.333	1652.67	3900.8	5741.38
Lus10027864	secondary metabolism.phenylpropanoids.lignin biosynthesis.CAD	moderately similar to ( 492) AT4G34230 | Symbols: CAD5, CAD-5 | ATCAD5 (CINNAMYL ALCOHOL DEHYDROGENASE 5); cinnamyl-alcohol dehydrogenase | chr4:16386898-16388666 REVERSEhighly similar to ( 539) CADH4_TOBAC Cinnamyl alcohol dehydrogenase (EC 1.1.1.195) (CAD) - Nicotiana tabacum (Common tobacco)moderately similar to ( 479) loc_os02g09490 12002.m06246 protein cinnamyl alcohol dehydrogenase, putativ…	100.333	1345	484.721	1192.22	104.333	1275.67	450.9	841.898
Lus10002812	secondary metabolism.phenylpropanoids.lignin biosynthesis.CAD	moderately similar to ( 496) AT4G34230 | Symbols: CAD5, CAD-5 | ATCAD5 (CINNAMYL ALCOHOL DEHYDROGENASE 5); cinnamyl-alcohol dehydrogenase | chr4:16386898-16388666 REVERSEhighly similar to ( 543) CADH4_TOBAC Cinnamyl alcohol dehydrogenase (EC 1.1.1.195) (CAD) - Nicotiana tabacum (Common tobacco)moderately similar to ( 481) loc_os02g09490 12002.m06246 protein cinnamyl alcohol dehydrogenase, putativ…	175.667	3070.67	354.975	4329.83	128	3648	485.672	4138.2
Lus10019811	secondary metabolism.phenylpropanoids.lignin biosynthesis.CAD	highly similar to ( 527) AT3G19450 | Symbols: CAD4, ATCAD4, CAD, CAD-C | ATCAD4; cinnamyl-alcohol dehydrogenase | chr3:6744859-6747005 FORWARDhighly similar to ( 571) CADH_MEDSA Cinnamyl alcohol dehydrogenase (EC 1.1.1.195) (CAD) - Medicago sativa (Alfalfa)highly similar to ( 502) loc_os02g09490 12002.m06246 protein cinnamyl alcohol dehydrogenase, putative, expressed AdhP PRK09422 Tdh Qor AdhC td…	1253.67	4025.33	475.075	2374.31	1473.67	3872.67	602.461	2456.49
Lus10014363	secondary metabolism.flavonoids.dihydroflavonols.dihydroflavonol 4-reductase	moderately similar to ( 420) AT5G19440 | Symbols: | cinnamyl-alcohol dehydrogenase, putative (CAD) | chr5:6556493-6558123 FORWARDmoderately similar to ( 231) DFRA_VITVI Dihydroflavonol-4-reductase (EC 1.1.1.219) (DFR) (Dihydrokaempferol 4-reductase) - Vitis vinifera (Grape)moderately similar to ( 402) loc_os01g34480 12001.m150871 protein dihydroflavonol-4-reductase, putative, expressed WcaG Epime…	244.667	277.667	137.436	166.76	274.333	228.667	76.2601	157.767
Lus10035956	secondary metabolism.phenylpropanoids.lignin biosynthesis.CAD	moderately similar to ( 499) AT4G37990 | Symbols: ELI3-2, ELI3, ATCAD8, CAD-B2 | ELI3-2 (ELICITOR-ACTIVATED GENE 3-2); aryl-alcohol dehydrogenase/ mannitol dehydrogenase | chr4:17855964-17857388 FORWARDhighly similar to ( 562) MTDH_FRAAN Probable mannitol dehydrogenase (EC 1.1.1.255) (NAD-dependent mannitol dehydrogenase) - Fragaria ananassa (Strawberry)moderately similar to ( 445) loc_os10g29470…	137.667	1860.33	2510.76	1421.78	80.3333	1389	3734.55	1272.76
Lus10002089	secondary metabolism.phenylpropanoids.lignin biosynthesis.CAD	highly similar to ( 560) AT4G39330 | Symbols: ATCAD9, CAD9 | CAD9 (CINNAMYL ALCOHOL DEHYDROGENASE 9); binding / catalytic/ oxidoreductase/ zinc ion binding | chr4:18291268-18292740 FORWARDhighly similar to ( 506) MTDH_MEDSA Probable mannitol dehydrogenase (EC 1.1.1.255) (NAD-dependent mannitol dehydrogenase) - Medicago sativa (Alfalfa)moderately similar to ( 437) loc_os10g29470 12010.m05819 prote…	411.667	10.6667	116.839	3.39628	495	11.3333	121.916	4.09038
Lus10025706	secondary metabolism.phenylpropanoids.lignin biosynthesis.CAD	moderately similar to ( 498) AT4G37990 | Symbols: ELI3-2, ELI3, ATCAD8, CAD-B2 | ELI3-2 (ELICITOR-ACTIVATED GENE 3-2); aryl-alcohol dehydrogenase/ mannitol dehydrogenase | chr4:17855964-17857388 FORWARDhighly similar to ( 554) MTDH_FRAAN Probable mannitol dehydrogenase (EC 1.1.1.255) (NAD-dependent mannitol dehydrogenase) - Fragaria ananassa (Strawberry)moderately similar to ( 439) loc_os10g29470…	1138	1918.67	22540.1	1430.26	2241.67	1872.33	30218.9	1063.12
Lus10002302	secondary metabolism.flavonoids.dihydroflavonols.dihydroflavonol 4-reductase	moderately similar to ( 411) AT5G19440 | Symbols: | cinnamyl-alcohol dehydrogenase, putative (CAD) | chr5:6556493-6558123 FORWARDmoderately similar to ( 231) DFRA_DIACA Dihydroflavonol-4-reductase (EC 1.1.1.219) (DFR) (Dihydrokaempferol 4-reductase) - Dianthus caryophyllus (Carnation) (Clove pink)moderately similar to ( 396) loc_os01g34480 12001.m150871 protein dihydroflavonol-4-reductase, putati…	204.333	371	85.3506	500.569	207.333	276.333	48.776	509.964
Lus10002300	secondary metabolism.flavonoids.dihydroflavonols.dihydroflavonol 4-reductase	moderately similar to ( 422) AT5G19440 | Symbols: | cinnamyl-alcohol dehydrogenase, putative (CAD) | chr5:6556493-6558123 FORWARDmoderately similar to ( 234) DFRA_DIACA Dihydroflavonol-4-reductase (EC 1.1.1.219) (DFR) (Dihydrokaempferol 4-reductase) - Dianthus caryophyllus (Carnation) (Clove pink)moderately similar to ( 398) loc_os01g34480 12001.m150871 protein dihydroflavonol-4-reductase, putati…	280.667	190	178.186	154.615	344.667	195.333	160.236	130.394
Lus10009955	secondary metabolism.flavonoids.dihydroflavonols.dihydroflavonol 4-reductase	highly similar to ( 535) AT1G51410 | Symbols: | cinnamyl-alcohol dehydrogenase, putative (CAD) | chr1:19059885-19061424 FORWARDmoderately similar to ( 241) DFRA_DIACA Dihydroflavonol-4-reductase (EC 1.1.1.219) (DFR) (Dihydrokaempferol 4-reductase) - Dianthus caryophyllus (Carnation) (Clove pink)moderately similar to ( 481) loc_os01g34480 12001.m150871 protein dihydroflavonol-4-reductase, putative…	1039.33	1887.33	3485.69	1339.72	933.333	1709.67	3626.66	1271.47

## Sheet: cellulose hemicellulose
	NAME	DESCRIPTION	M−Fn−L	M−Fn−R	D−Fn−L	D−Fn−R	M−Ly−L	M−Ly−R	D−Ly−L	D−Ly−R
Lus10008646	cell wall.cellulose synthesis	highly similar to ( 894) AT5G03760 | Symbols: ATCSLA09, CSLA09, ATCSLA9, CSLA9, RAT4 | ATCSLA09; mannan synthase/ transferase, transferring glycosyl groups | chr5:985910-990087 REVERSEhighly similar to ( 838) loc_os06g42020 12006.m08734 protein CSLA9 - cellulose synthase-like family A, expressedCOG1215 bcsA PRK11204 no original description	93.3333	471	9.92686	34.8507	161.333	623.333	16.248	30.8942
Lus10026923	cell wall.cellulose synthesis	highly similar to ( 984) AT4G31590 | Symbols: ATCSLC05, CSLC05, ATCSLC5 | ATCSLC5 (CELLULOSE-SYNTHASE LIKE C5); cellulose synthase/ transferase, transferring glycosyl groups | chr4:15309889-15312336 REVERSEhighly similar to ( 879) loc_os08g15420 12008.m05665 protein CSLC3 - cellulose synthase-like family C, expressedCOG1215 bcsA PRK11204 no original description	64	183	27.0739	31.9299	105	238	39.9444	26.9134
Lus10020539	cell wall.cellulose synthesis	highly similar to ( 602) AT5G22740 | Symbols: ATCSLA02, CSLA02, ATCSLA2 | ATCSLA02; mannan synthase/ transferase, transferring glycosyl groups | chr5:7555379-7559866 REVERSEhighly similar to ( 532) loc_os06g42020 12006.m08734 protein CSLA9 - cellulose synthase-like family A, expressedCOG1215 bcsA no original description	418.333	1769.67	202.886	419.736	615.667	1846.67	178.839	145.322
Lus10020120	cell wall.cellulose synthesis	highly similar to ( 950) AT4G31590 | Symbols: ATCSLC05, CSLC05, ATCSLC5 | ATCSLC5 (CELLULOSE-SYNTHASE LIKE C5); cellulose synthase/ transferase, transferring glycosyl groups | chr4:15309889-15312336 REVERSEhighly similar to ( 842) loc_os08g15420 12008.m05665 protein CSLC3 - cellulose synthase-like family C, expressedCOG1215 bcsA PRK11204 no original description	33.3333	55.3333	49.3445	12.1954	53	72	70.4721	6.84403
Lus10025886	cell wall.cellulose synthesis	highly similar to ( 885) AT3G07330 | Symbols: ATCSLC06, CSLC06, ATCSLC6 | ATCSLC6 (CELLULOSE-SYNTHASE LIKE C6); cellulose synthase/ transferase, transferring glycosyl groups | chr3:2336121-2338942 REVERSEhighly similar to ( 744) loc_os05g43530 12005.m08480 protein CSLC7 - cellulose synthase-like family C, expressedCOG1215 bcsA no original description	54	55.6667	104.153	31.7182	69.6667	74.3333	117.197	23.1928
Lus10035580	cell wall.cellulose synthesis	highly similar to ( 807) AT5G03760 | Symbols: ATCSLA09, CSLA09, ATCSLA9, CSLA9, RAT4 | ATCSLA09; mannan synthase/ transferase, transferring glycosyl groups | chr5:985910-990087 REVERSEhighly similar to ( 745) loc_os06g42020 12006.m08734 protein CSLA9 - cellulose synthase-like family A, expressedCOG1215 bcsA no original description	99	235.667	15.0782	12.1703	266.667	314.333	16.2496	27.8012
Lus10007715	cell wall.cellulose synthesis	highly similar to ( 947) AT4G07960 | Symbols: ATCSLC12, CSLC12 | ATCSLC12 (CELLULOSE-SYNTHASE LIKE C12); cellulose synthase/ transferase, transferring glycosyl groups | chr4:4802628-4805114 REVERSEhighly similar to ( 847) loc_os05g43530 12005.m08480 protein CSLC7 - cellulose synthase-like family C, expressedCOG1215 bcsA PRK11204 no original description	453.333	921.333	745.874	658.785	532.333	992.333	1135.09	611.809
Lus10039440	cell wall.cellulose synthesis	highly similar to ( 935) AT3G28180 | Symbols: ATCSLC04, CSLC04, ATCSLC4, CSLC4 | ATCSLC04 (CELLULOSE-SYNTHASE LIKE C4); cellulose synthase/ transferase, transferring glycosyl groups | chr3:10506110-10509067 FORWARDhighly similar to ( 822) loc_os08g15420 12008.m05665 protein CSLC3 - cellulose synthase-like family C, expressedCOG1215 bcsA no original description	374.333	579.667	236.459	258.099	520.333	761.667	366.101	208.819
Lus10039475	cell wall.cellulose synthesis	highly similar to ( 937) AT3G28180 | Symbols: ATCSLC04, CSLC04, ATCSLC4, CSLC4 | ATCSLC04 (CELLULOSE-SYNTHASE LIKE C4); cellulose synthase/ transferase, transferring glycosyl groups | chr3:10506110-10509067 FORWARDhighly similar to ( 820) loc_os08g15420 12008.m05665 protein CSLC3 - cellulose synthase-like family C, expressedCOG1215 bcsA no original description	360	763.667	140.877	787.683	535.333	1086	108.391	559.298
Lus10009387	cell wall.cellulose synthesis	highly similar to ( 867) AT5G22740 | Symbols: ATCSLA02, CSLA02, ATCSLA2 | ATCSLA02; mannan synthase/ transferase, transferring glycosyl groups | chr5:7555379-7559866 REVERSEhighly similar to ( 767) loc_os06g42020 12006.m08734 protein CSLA9 - cellulose synthase-like family A, expressedCOG1215 bcsA PRK11204 no original description	328.333	1868.67	318.09	535.464	621.333	2138	617.454	245.034
Lus10008225	cell wall.cellulose synthesis.cellulose synthase	highly similar to ( 673) AT5G44030 | Symbols: CESA4, IRX5, NWS2 | CESA4 (CELLULOSE SYNTHASE A4); cellulose synthase/ transferase, transferring glycosyl groups | chr5:17714713-17719564 FORWARDhighly similar to ( 654) loc_os10g32980 12010.m06134 protein CESA7 - cellulose synthase, expressedCellulose_synt no original description	30.6667	78.6667	35.6346	66.2939	68.3333	379	32.4959	24.5448
Lus10030454	cell wall.cellulose synthesis.cellulose synthase	moderately similar to ( 371) AT3G03050 | Symbols: CSLD3, KJK, ATCSLD3 | CSLD3 (CELLULOSE SYNTHASE-LIKE D3); cellulose synthase/ transferase, transferring glycosyl groups | chr3:687873-691629 FORWARDmoderately similar to ( 332) loc_os06g02180 12006.m04952 protein CSLD2 - cellulose synthase-like family D, expressed no original description	80.3333	65	127.151	211.682	81	94.3333	123.242	90.5062
Lus10030035	cell wall.cellulose synthesis.cellulose synthase	highly similar to ( 598) AT2G32540 | Symbols: ATCSLB04, CSLB04, ATCSLB4 | ATCSLB04; cellulose synthase/ transferase/ transferase, transferring glycosyl groups | chr2:13814686-13818289 FORWARDhighly similar to ( 611) loc_os10g20090 12010.m21855 protein CSLH1 - cellulose synthase-like family H, expressedCellulose_synt no original description	800	69	100.393	70.629	879	60.3333	79.9141	79.8599
Lus10006161	cell wall.cellulose synthesis.cellulose synthase	nearly identical (1698) AT5G64740 | Symbols: CESA6, IXR2, E112, PRC1 | CESA6 (CELLULOSE SYNTHASE 6); cellulose synthase/ transferase, transferring glycosyl groups | chr5:25881555-25886333 FORWARDnearly identical (1470) loc_os03g62090 12003.m11087 protein CESA5 - cellulose synthase, expressedCellulose_synt no original description	1714	1232.33	642.901	572.724	2248.67	1540.33	769.675	419.327
Lus10026609	cell wall.cellulose synthesis.cellulose synthase	nearly identical (1332) AT3G03050 | Symbols: CSLD3, KJK, ATCSLD3 | CSLD3 (CELLULOSE SYNTHASE-LIKE D3); cellulose synthase/ transferase, transferring glycosyl groups | chr3:687873-691629 FORWARDnearly identical (1311) loc_os06g02180 12006.m04952 protein CSLD2 - cellulose synthase-like family D, expressedCellulose_synt no original description	130.333	260	151.083	1010.43	247.333	425.667	156.805	574.374
Lus10008226	cell wall.cellulose synthesis.cellulose synthase	highly similar to ( 699) AT5G44030 | Symbols: CESA4, IRX5, NWS2 | CESA4 (CELLULOSE SYNTHASE A4); cellulose synthase/ transferase, transferring glycosyl groups | chr5:17714713-17719564 FORWARDhighly similar to ( 669) loc_os10g32980 12010.m06134 protein CESA7 - cellulose synthase, expressedCellulose_synt no original description	63.3333	650.667	76.0325	182.854	113.667	977	69.4322	129.806
Lus10041063	cell wall.cellulose synthesis.cellulose synthase	nearly identical (1775) AT5G64740 | Symbols: CESA6, IXR2, E112, PRC1 | CESA6 (CELLULOSE SYNTHASE 6); cellulose synthase/ transferase, transferring glycosyl groups | chr5:25881555-25886333 FORWARDnearly identical (1521) loc_os07g24190 12007.m28970 protein CESA3 - cellulose synthase, expressedCellulose_synt no original description	1514.33	1460.33	1017.07	646.012	1704.67	1702.67	1181.96	486.347
Lus10013851	cell wall.cellulose synthesis.cellulose synthase	nearly identical (1824) AT4G38190 | Symbols: ATCSLD4, CSLD4 | ATCSLD4; cellulose synthase/ transferase, transferring glycosyl groups | chr4:17910096-17913641 REVERSEnearly identical (1615) loc_os06g02180 12006.m04952 protein CSLD2 - cellulose synthase-like family D, expressedCellulose_synt no original description	18.6667	25	102.46	22.8579	13.6667	31	132.101	22.2285
Lus10003525	cell wall.cellulose synthesis.cellulose synthase	highly similar to ( 917) AT5G64740 | Symbols: CESA6, IXR2, E112, PRC1 | CESA6 (CELLULOSE SYNTHASE 6); cellulose synthase/ transferase, transferring glycosyl groups | chr5:25881555-25886333 FORWARDhighly similar to ( 743) loc_os07g24190 12007.m28970 protein CESA3 - cellulose synthase, expressedCellulose_synt no original description	160.667	98	52.4168	18.0244	232.333	192.333	32.1645	6.84276
Lus10039607	cell wall.cellulose synthesis.cellulose synthase	nearly identical (1802) AT5G05170 | Symbols: CESA3, IXR1, ATCESA3, ATH-B, CEV1 | CEV1 (CONSTITUTIVE EXPRESSION OF VSP 1); cellulose synthase/ transferase, transferring glycosyl groups | chr5:1530401-1535090 REVERSEnearly identical (1738) loc_os03g59340 12003.m10832 protein CESA2 - cellulose synthase, expressedCellulose_synt no original description	1837.67	342	3911.49	430.451	2774	449.667	4057.51	299.797
Lus10002940	cell wall.cellulose synthesis.cellulose synthase	highly similar to ( 583) AT5G64740 | Symbols: CESA6, IXR2, E112, PRC1 | CESA6 (CELLULOSE SYNTHASE 6); cellulose synthase/ transferase, transferring glycosyl groups | chr5:25881555-25886333 FORWARDhighly similar to ( 503) loc_os07g14850 12007.m05929 protein CESA6 - cellulose synthase, expressedCellulose_synt no original description	418.667	434	106.596	77.1512	569.667	605.333	67.0547	44.2582
Lus10002134	cell wall.cellulose synthesis.cellulose synthase	nearly identical (1351) AT3G03050 | Symbols: CSLD3, KJK, ATCSLD3 | CSLD3 (CELLULOSE SYNTHASE-LIKE D3); cellulose synthase/ transferase, transferring glycosyl groups | chr3:687873-691629 FORWARDnearly identical (1327) loc_os06g02180 12006.m04952 protein CSLD2 - cellulose synthase-like family D, expressedCellulose_synt no original description	38.3333	59.3333	76.8019	196.419	35	76.6667	105.633	289.187
Lus10030455	cell wall.cellulose synthesis.cellulose synthase	nearly identical (1266) AT3G03050 | Symbols: CSLD3, KJK, ATCSLD3 | CSLD3 (CELLULOSE SYNTHASE-LIKE D3); cellulose synthase/ transferase, transferring glycosyl groups | chr3:687873-691629 FORWARDnearly identical (1244) loc_os06g02180 12006.m04952 protein CSLD2 - cellulose synthase-like family D, expressedCellulose_synt no original description	94.3333	247.333	96.9849	848.485	151.333	378.667	115.782	449.895
Lus10029245	cell wall.cellulose synthesis.cellulose synthase	nearly identical (1652) AT4G18780 | Symbols: CESA8, IRX1, ATCESA8, LEW2 | IRX1 (IRREGULAR XYLEM 1); cellulose synthase/ transferase, transferring glycosyl groups | chr4:10312846-10316719 REVERSEnearly identical (1520) loc_os01g54620 12001.m11625 protein CESA4 - cellulose synthase, expressedCellulose_synt no original description	26.3333	425	31.8728	66.0613	41.3333	848	40.3316	47.2547
Lus10025046	cell wall.cellulose synthesis.cellulose synthase	nearly identical (1484) AT1G02730 | Symbols: ATCSLD5, CSLD5 | ATCSLD5; 1,4-beta-D-xylan synthase/ cellulose synthase | chr1:594697-598473 REVERSEnearly identical (1296) loc_os12g36890 12012.m07474 protein CSLD4 - cellulose synthase-like family D, expressedCellulose_synt no original description	4.66667	127.667	3.43032	24.793	7.66667	153	15.9047	10.9205
Lus10030453	cell wall.cellulose synthesis.cellulose synthase	nearly identical (1597) AT3G03050 | Symbols: CSLD3, KJK, ATCSLD3 | CSLD3 (CELLULOSE SYNTHASE-LIKE D3); cellulose synthase/ transferase, transferring glycosyl groups | chr3:687873-691629 FORWARDnearly identical (1578) loc_os06g02180 12006.m04952 protein CSLD2 - cellulose synthase-like family D, expressedCellulose_synt no original description	343.333	467	572.109	1122	400	486.333	633.04	678.194
Lus10016625	cell wall.cellulose synthesis.cellulose synthase	highly similar to ( 766) AT1G55850 | Symbols: ATCSLE1, CSLE1 | ATCSLE1; cellulose synthase/ transferase, transferring glycosyl groups | chr1:20876752-20879414 FORWARDhighly similar to ( 685) loc_os09g30130 12009.m060004 protein CSLE6 - cellulose synthase-like family E, expressedCellulose_synt no original description	526	1145.33	758.898	3362.77	517.667	1492.67	887.677	2698.32
Lus10018902	cell wall.cellulose synthesis.cellulose synthase	nearly identical (1939) AT4G32410 | Symbols: CESA1, RSW1 | CESA1 (CELLULOSE SYNTHASE 1); cellulose synthase/ transferase, transferring glycosyl groups | chr4:15641009-15646388 REVERSEnearly identical (1853) loc_os05g08370 12005.m05354 protein CESA1 - cellulose synthase, expressedCellulose_synt no original description	3355	3290.33	1937.13	1582.59	3461.33	3982.33	1625.86	1076.17
Lus10023057	cell wall.cellulose synthesis.cellulose synthase	highly similar to ( 745) AT4G23990 | Symbols: ATCSLG3, CSLG3 | ATCSLG3; cellulose synthase/ transferase/ transferase, transferring glycosyl groups | chr4:12456491-12460498 FORWARDmoderately similar to ( 430) loc_os09g30130 12009.m060004 protein CSLE6 - cellulose synthase-like family E, expressedCellulose_synt no original description	3654.67	84.3333	1067.27	324.172	3634.33	231.333	608.283	493.367
Lus10028597	cell wall.cellulose synthesis.cellulose synthase	nearly identical (1904) AT4G32410 | Symbols: CESA1, RSW1 | CESA1 (CELLULOSE SYNTHASE 1); cellulose synthase/ transferase, transferring glycosyl groups | chr4:15641009-15646388 REVERSEnearly identical (1814) loc_os05g08370 12005.m05354 protein CESA1 - cellulose synthase, expressedCellulose_synt no original description	3022.67	2736.67	1681.08	1342.93	3387.67	3260	1692	956.361
Lus10032415	cell wall.cellulose synthesis.cellulose synthase	highly similar to ( 745) AT4G23990 | Symbols: ATCSLG3, CSLG3 | ATCSLG3; cellulose synthase/ transferase/ transferase, transferring glycosyl groups | chr4:12456491-12460498 FORWARDmoderately similar to ( 427) loc_os02g49332 12002.m34039 protein CSLE2 - cellulose synthase-like family E, expressedCellulose_synt no original description	3127	59.6667	992.416	87.4364	3431.33	75.6667	529.608	72.4556
Lus10007538	cell wall.cellulose synthesis.cellulose synthase	nearly identical (1780) AT5G05170 | Symbols: CESA3, IXR1, ATCESA3, ATH-B, CEV1 | CEV1 (CONSTITUTIVE EXPRESSION OF VSP 1); cellulose synthase/ transferase, transferring glycosyl groups | chr5:1530401-1535090 REVERSEnearly identical (1759) loc_os07g10770 12007.m05532 protein CESA8 - cellulose synthase, expressedCellulose_synt no original description	3006.33	3825.67	3258.03	2388.68	3887	4613	4882.72	2034.44
Lus10002939	cell wall.cellulose synthesis.cellulose synthase	nearly identical (1820) AT5G64740 | Symbols: CESA6, IXR2, E112, PRC1 | CESA6 (CELLULOSE SYNTHASE 6); cellulose synthase/ transferase, transferring glycosyl groups | chr5:25881555-25886333 FORWARDnearly identical (1536) loc_os03g62090 12003.m11087 protein CESA5 - cellulose synthase, expressedCellulose_synt no original description	1142.67	1458.67	267.977	232.917	1673.33	1952.67	197.147	178.326
Lus10010024	cell wall.cellulose synthesis.cellulose synthase	nearly identical (1753) AT1G02730 | Symbols: ATCSLD5, CSLD5 | ATCSLD5; 1,4-beta-D-xylan synthase/ cellulose synthase | chr1:594697-598473 REVERSEnearly identical (1510) loc_os12g36890 12012.m07474 protein CSLD4 - cellulose synthase-like family D, expressedCellulose_synt no original description	7	185.667	3.77124	25.3848	11.3333	199.333	4.73793	12.2572
Lus10003526	cell wall.cellulose synthesis.cellulose synthase	nearly identical (1814) AT5G64740 | Symbols: CESA6, IXR2, E112, PRC1 | CESA6 (CELLULOSE SYNTHASE 6); cellulose synthase/ transferase, transferring glycosyl groups | chr5:25881555-25886333 FORWARDnearly identical (1541) loc_os03g62090 12003.m11087 protein CESA5 - cellulose synthase, expressedCellulose_synt no original description	1573.33	1706.33	535.856	406.687	2184.67	2118	364.501	283.6
Lus10012198	cell wall.cellulose synthesis.cellulose synthase	nearly identical (1782) AT5G05170 | Symbols: CESA3, IXR1, ATCESA3, ATH-B, CEV1 | CEV1 (CONSTITUTIVE EXPRESSION OF VSP 1); cellulose synthase/ transferase, transferring glycosyl groups | chr5:1530401-1535090 REVERSEnearly identical (1764) loc_os07g10770 12007.m05532 protein CESA8 - cellulose synthase, expressedCellulose_synt no original description	2163.67	2192.33	1917.49	1147.65	2543	2548.67	3377.38	859.166
Lus10009248	cell wall.cellulose synthesis.cellulose synthase	nearly identical (1946) AT3G03050 | Symbols: CSLD3, KJK, ATCSLD3 | CSLD3 (CELLULOSE SYNTHASE-LIKE D3); cellulose synthase/ transferase, transferring glycosyl groups | chr3:687873-691629 FORWARDnearly identical (1856) loc_os06g02180 12006.m04952 protein CSLD2 - cellulose synthase-like family D, expressedCellulose_synt no original description	412	350	258.775	284.468	415.333	392.667	188.359	163.753
Lus10007296	cell wall.cellulose synthesis.cellulose synthase	nearly identical (1663) AT4G18780 | Symbols: CESA8, IRX1, ATCESA8, LEW2 | IRX1 (IRREGULAR XYLEM 1); cellulose synthase/ transferase, transferring glycosyl groups | chr4:10312846-10316719 REVERSEnearly identical (1531) loc_os01g54620 12001.m11625 protein CESA4 - cellulose synthase, expressedCellulose_synt no original description	26.3333	472	38.333	69.6424	66.6667	1031	29.7854	39.4795
Lus10003196	cell wall.cellulose synthesis.cellulose synthase	highly similar to ( 763) AT4G23990 | Symbols: ATCSLG3, CSLG3 | ATCSLG3; cellulose synthase/ transferase/ transferase, transferring glycosyl groups | chr4:12456491-12460498 FORWARDmoderately similar to ( 439) loc_os09g30130 12009.m060004 protein CSLE6 - cellulose synthase-like family E, expressedCellulose_synt no original description	1384	322	507.462	504.075	1314.67	731.667	300.739	792.322
Lus10034671	cell wall.cellulose synthesis.COBRA	highly similar to ( 722) AT5G60920 | Symbols: COB | COB (COBRA) | chr5:24511466-24513932 REVERSEhighly similar to ( 684) COBL1_ORYSA COBRA-like 1 protein precursor (BRITTLE CULM1-like 6 protein) - Oryza sativa (Rice)highly similar to ( 684) loc_os07g41310 12007.m08367 protein COBRA-like protein 4 precursor, putative, expressedPhytochel_synth no original description	1127	398.333	256.709	218.403	1850	384.667	215.403	202.059
Lus10037720	cell wall.cellulose synthesis.COBRA	highly similar to ( 797) AT4G16120 | Symbols: ATSEB1, COBL7, SEB1 | COBL7 (COBRA-LIKE 7) | chr4:9116591-9119138 REVERSEweakly similar to ( 136) COBL3_ORYSA COBRA-like 3 protein precursor (BRITTLE CULM1-like 4 protein) - Oryza sativa (Rice)highly similar to ( 630) loc_os03g18910 12003.m07310 protein COBRA-like protein 7 precursor, putative, expressedPhytochel_synth no original description	138.667	410	624.868	969.42	162.667	482	704.503	738.868
Lus10034670	cell wall.cellulose synthesis.COBRA	highly similar to ( 706) AT5G15630 | Symbols: COBL4, IRX6 | IRX6 | chr5:5084842-5086545 FORWARDhighly similar to ( 658) COBL5_ORYSA COBRA-like 5 protein precursor (Protein BRITTLE CULM1) - Oryza sativa (Rice)highly similar to ( 658) loc_os03g30250 12003.m08287 protein phytochelatin synthetase-like conserved region family protein, expressedPhytochel_synth no original description	17.3333	302.333	20.2103	34.4749	34	635.333	23.0353	37.4234
Lus10010022	cell wall.cellulose synthesis.COBRA	highly similar to ( 541) AT4G16120 | Symbols: ATSEB1, COBL7, SEB1 | COBL7 (COBRA-LIKE 7) | chr4:9116591-9119138 REVERSEweakly similar to ( 102) COBL1_ORYSA COBRA-like 1 protein precursor (BRITTLE CULM1-like 6 protein) - Oryza sativa (Rice)highly similar to ( 504) loc_os03g18910 12003.m07310 protein COBRA-like protein 7 precursor, putative, expressedPhytochel_synth no original description	2	13.6667	1.36971	57.904	8	51.3333	2.36896	112.529
Lus10010097	cell wall.cellulose synthesis.COBRA	weakly similar to ( 162) AT1G09790 | Symbols: COBL6 | COBL6 (COBRA-LIKE PROTEIN 6 PRECURSOR) | chr1:3168568-3170819 REVERSEweakly similar to ( 120) COBL3_ORYSA COBRA-like 3 protein precursor (BRITTLE CULM1-like 4 protein) - Oryza sativa (Rice)weakly similar to ( 120) loc_os05g32110 12005.m083711 protein COBRA-like protein 4 precursor, putative, expressed no original description	1	2.33333	40.4419	3.07152	1.33333	2.66667	35.5598	4.09422
Lus10016847	cell wall.cellulose synthesis.COBRA	highly similar to ( 810) AT4G16120 | Symbols: ATSEB1, COBL7, SEB1 | COBL7 (COBRA-LIKE 7) | chr4:9116591-9119138 REVERSEweakly similar to ( 141) COBL3_ORYSA COBRA-like 3 protein precursor (BRITTLE CULM1-like 4 protein) - Oryza sativa (Rice)highly similar to ( 646) loc_os03g18910 12003.m07310 protein COBRA-like protein 7 precursor, putative, expressedPhytochel_synth no original description	231.333	817.333	898.653	2322.04	349.667	968.667	1016.36	1512.25
Lus10034666	cell wall.cellulose synthesis.COBRA	highly similar to ( 616) AT5G15630 | Symbols: COBL4, IRX6 | IRX6 | chr5:5084842-5086545 FORWARDhighly similar to ( 600) COBL5_ORYSA COBRA-like 5 protein precursor (Protein BRITTLE CULM1) - Oryza sativa (Rice)highly similar to ( 600) loc_os03g30250 12003.m08287 protein phytochelatin synthetase-like conserved region family protein, expressedPhytochel_synth no original description	1.66667	32.6667	2.40053	2.37539	1.33333	32.6667	3.38351	1.71293
Lus10017863	cell wall.cellulose synthesis.COBRA	highly similar to ( 707) AT5G15630 | Symbols: COBL4, IRX6 | IRX6 | chr5:5084842-5086545 FORWARDhighly similar to ( 658) COBL5_ORYSA COBRA-like 5 protein precursor (Protein BRITTLE CULM1) - Oryza sativa (Rice)highly similar to ( 658) loc_os03g30250 12003.m08287 protein phytochelatin synthetase-like conserved region family protein, expressedPhytochel_synth no original description	11.6667	463	16.7929	109.671	34.6667	895	34.5588	54.8488
Lus10021144	cell wall.cellulose synthesis.COBRA	highly similar to ( 711) AT5G60920 | Symbols: COB | COB (COBRA) | chr5:24511466-24513932 REVERSEhighly similar to ( 665) COBL1_ORYSA COBRA-like 1 protein precursor (BRITTLE CULM1-like 6 protein) - Oryza sativa (Rice)highly similar to ( 665) loc_os07g41310 12007.m08367 protein COBRA-like protein 4 precursor, putative, expressedPhytochel_synth no original description	668.667	1906	154.576	312.933	732.333	2117	109.089	236.24
Lus10007986	cell wall.cellulose synthesis.COBRA	highly similar to ( 717) AT5G60920 | Symbols: COB | COB (COBRA) | chr5:24511466-24513932 REVERSEhighly similar to ( 673) COBL1_ORYSA COBRA-like 1 protein precursor (BRITTLE CULM1-like 6 protein) - Oryza sativa (Rice)highly similar to ( 673) loc_os07g41310 12007.m08367 protein COBRA-like protein 4 precursor, putative, expressedPhytochel_synth no original description	1097.67	2002.67	208.043	487.217	1223	2277.33	194.778	344.973
Lus10042386	cell wall.cellulose synthesis.COBRA	moderately similar to ( 346) AT3G29810 | Symbols: COBL2 | COBL2 (COBRA-LIKE PROTEIN 2 PRECURSOR) | chr3:11728212-11730158 FORWARDmoderately similar to ( 340) COBL1_ORYSA COBRA-like 1 protein precursor (BRITTLE CULM1-like 6 protein) - Oryza sativa (Rice)moderately similar to ( 340) loc_os07g41310 12007.m08367 protein COBRA-like protein 4 precursor, putative, expressedPhytochel_synth no original de…	32	9.66667	4.80256	6.10632	23.6667	7.66667	3.04533	4.79058
Lus10031972	cell wall.cellulose synthesis.COBRA	highly similar to ( 695) AT5G15630 | Symbols: COBL4, IRX6 | IRX6 | chr5:5084842-5086545 FORWARDhighly similar to ( 617) COBL5_ORYSA COBRA-like 5 protein precursor (Protein BRITTLE CULM1) - Oryza sativa (Rice)highly similar to ( 617) loc_os03g30250 12003.m08287 protein phytochelatin synthetase-like conserved region family protein, expressedPhytochel_synth no original description	7.33333	41.3333	9.25259	9.47826	10.3333	62.6667	12.5398	6.46274
Lus10007217	cell wall.cellulose synthesis.COBRA	moderately similar to ( 450) AT1G09790 | Symbols: COBL6 | COBL6 (COBRA-LIKE PROTEIN 6 PRECURSOR) | chr1:3168568-3170819 REVERSEmoderately similar to ( 421) COBL1_ORYSA COBRA-like 1 protein precursor (BRITTLE CULM1-like 6 protein) - Oryza sativa (Rice)moderately similar to ( 421) loc_os07g41310 12007.m08367 protein COBRA-like protein 4 precursor, putative, expressedPhytochel_synth no original desc…	1	1	62.0197	2.06774	1.33333	1	80.9388	1.36346
Lus10042164	cell wall.hemicellulose synthesis	highly similar to ( 949) AT5G62620 | Symbols: | galactosyltransferase family protein | chr5:25137136-25139433 FORWARDhighly similar to ( 848) loc_os03g58920 12003.m10795 protein galactosyltransferase/ transferase, transferring hexosyl groups, putative, expressed Gal-bind_lectin Galactosyl_T no original description	291.333	357.667	555.435	331.572	299	366.333	652.664	327.63
Lus10036776	cell wall.hemicellulose synthesis	highly similar to ( 633) AT2G03220 | Symbols: FT1, ATFUT1, ATFT1, MUR2 | FT1 (FUCOSYLTRANSFERASE 1); fucosyltransferase/ transferase, transferring glycosyl groups | chr2:970401-972353 REVERSEhighly similar to ( 629) FUT1_PEA Galactoside 2-alpha-L-fucosyltransferase (EC 2.4.1.69) (Xyloglucan alpha-(1,2)-fucosyltransferase) (PsFT1) - Pisum sativum (Garden pea)highly similar to ( 545) loc_os02g52630…	196	192.333	614.86	205.223	172.667	180.667	669.631	209.262
Lus10029049	cell wall.hemicellulose synthesis	moderately similar to ( 447) AT2G03220 | Symbols: FT1, ATFUT1, ATFT1, MUR2 | FT1 (FUCOSYLTRANSFERASE 1); fucosyltransferase/ transferase, transferring glycosyl groups | chr2:970401-972353 REVERSEmoderately similar to ( 426) FUT1_PEA Galactoside 2-alpha-L-fucosyltransferase (EC 2.4.1.69) (Xyloglucan alpha-(1,2)-fucosyltransferase) (PsFT1) - Pisum sativum (Garden pea)moderately similar to ( 389) lo…	677	64	290.582	123.513	684.667	71	148.826	83.6785
Lus10041644	cell wall.hemicellulose synthesis	moderately similar to ( 357) AT2G03220 | Symbols: FT1, ATFUT1, ATFT1, MUR2 | FT1 (FUCOSYLTRANSFERASE 1); fucosyltransferase/ transferase, transferring glycosyl groups | chr2:970401-972353 REVERSEmoderately similar to ( 364) FUT1_PEA Galactoside 2-alpha-L-fucosyltransferase (EC 2.4.1.69) (Xyloglucan alpha-(1,2)-fucosyltransferase) (PsFT1) - Pisum sativum (Garden pea)moderately similar to ( 342) lo…	923	505.333	242.967	1122.12	810	536.667	256.224	1023.58
Lus10026125	cell wall.hemicellulose synthesis	moderately similar to ( 308) AT2G03210 | Symbols: FUT2, ATFUT2 | FUT2 (FUCOSYLTRANSFERASE 2); fucosyltransferase/ transferase, transferring glycosyl groups | chr2:968335-970018 REVERSEmoderately similar to ( 307) FUT1_PEA Galactoside 2-alpha-L-fucosyltransferase (EC 2.4.1.69) (Xyloglucan alpha-(1,2)-fucosyltransferase) (PsFT1) - Pisum sativum (Garden pea)moderately similar to ( 302) loc_os02g5264…	226	203.333	36.6867	141.6	244	162	27.7935	213.2
Lus10043102	cell wall.hemicellulose synthesis	highly similar to ( 579) AT3G06440 | Symbols: | galactosyltransferase family protein | chr3:1973183-1975272 REVERSEhighly similar to ( 545) loc_os01g22550 12001.m08735 protein beta 1, 3 galactosyltransferase, putative, expressed Galactosyl_T no original description	203	142	56.8823	182.333	213.333	162.667	46.0773	161.833
Lus10008693	cell wall.hemicellulose synthesis	moderately similar to ( 308) AT2G03210 | Symbols: FUT2, ATFUT2 | FUT2 (FUCOSYLTRANSFERASE 2); fucosyltransferase/ transferase, transferring glycosyl groups | chr2:968335-970018 REVERSEmoderately similar to ( 310) FUT1_PEA Galactoside 2-alpha-L-fucosyltransferase (EC 2.4.1.69) (Xyloglucan alpha-(1,2)-fucosyltransferase) (PsFT1) - Pisum sativum (Garden pea)moderately similar to ( 306) loc_os02g5264…	157.667	140	55.524	185.578	154.667	130	40.3248	229.047
Lus10012571	cell wall.hemicellulose synthesis	moderately similar to ( 325) AT2G03220 | Symbols: FT1, ATFUT1, ATFT1, MUR2 | FT1 (FUCOSYLTRANSFERASE 1); fucosyltransferase/ transferase, transferring glycosyl groups | chr2:970401-972353 REVERSEmoderately similar to ( 339) FUT1_PEA Galactoside 2-alpha-L-fucosyltransferase (EC 2.4.1.69) (Xyloglucan alpha-(1,2)-fucosyltransferase) (PsFT1) - Pisum sativum (Garden pea)moderately similar to ( 320) lo…	6.66667	1.33333	40.1275	1.70979	10.3333	1	46.7452	1.70782
Lus10041641	cell wall.hemicellulose synthesis	moderately similar to ( 426) AT1G14100 | Symbols: FUT8 | FUT8 (FUCOSYLTRANSFERASE 8); galactoside 2-alpha-L-fucosyltransferase | chr1:4827961-4829587 FORWARDmoderately similar to ( 412) FUT1_PEA Galactoside 2-alpha-L-fucosyltransferase (EC 2.4.1.69) (Xyloglucan alpha-(1,2)-fucosyltransferase) (PsFT1) - Pisum sativum (Garden pea)moderately similar to ( 399) loc_os02g52630 12002.m10293 protein fuco…	216.667	152.333	102.462	131.007	202	167.333	47.0868	87.3645
Lus10010790	cell wall.hemicellulose synthesis.glucuronoxylan	weakly similar to ( 109) AT3G50760 | Symbols: GATL2 | GATL2 (Galacturonosyltransferase-like 2); polygalacturonate 4-alpha-galacturonosyltransferase/ transferase, transferring glycosyl groups / transferase, transferring hexosyl groups | chr3:18868074-18869099 FORWARD no original description	10	48	2.05473	26.8203	11	77	5.0778	9.52766
Lus10020890	cell wall.hemicellulose synthesis.glucuronoxylan	highly similar to ( 825) AT3G18660 | Symbols: PGSIP1 | PGSIP1 (PLANT GLYCOGENIN-LIKE STARCH INITIATION PROTEIN 1); transferase, transferring glycosyl groups | chr3:6419211-6421959 REVERSEhighly similar to ( 760) loc_os05g35200 12005.m27835 protein secondary cell wall-related glycosyltransferase family 8, putative, expressed Glyco_transf_8 no original description	8.33333	24	4.79969	8.85219	12	39.6667	10.1607	8.18966
Lus10033485	cell wall.hemicellulose synthesis.glucuronoxylan	highly similar to ( 668) AT3G18660 | Symbols: PGSIP1 | PGSIP1 (PLANT GLYCOGENIN-LIKE STARCH INITIATION PROTEIN 1); transferase, transferring glycosyl groups | chr3:6419211-6421959 REVERSEhighly similar to ( 562) loc_os05g35200 12005.m27835 protein secondary cell wall-related glycosyltransferase family 8, putative, expressed Glyco_transf_8 no original description	1	17.6667	2.73975	3.73623	7.33333	54.3333	3.04702	4.09038
Lus10021731	cell wall.hemicellulose synthesis.glucuronoxylan	highly similar to ( 797) AT4G33330 | Symbols: PGSIP3 | transferase, transferring glycosyl groups | chr4:16059754-16063061 REVERSEhighly similar to ( 625) loc_os03g08600 12003.m34803 protein transferase, transferring glycosyl groups, putative, expressed Glyco_transf_8 no original description	3.33333	216.333	13.0099	100.119	5.33333	242.667	13.5425	76.4329
