# Supplementary material for: Evaluation of Differentially Expressed Genes in Leaves vs. Roots Subjected to Drought Stress in Flax (Linum usitatissimum L.)
Source: Int J Mol Sci. 2023 Jul 27;24(15):12019. doi: 10.3390/ijms241512019 (PMC10419004; doi:10.3390/ijms241512019)
Supplement: Supplementary file 1 [file ijms-24-12019-s001.zip › Supplementary Table S6.xlsx]

## Sheet: abscisic acid
	M−Fn−L	M−Fn−R	D−Fn−L	D−Fn−R	M−Ly−L	M−Ly−R	D−Ly−L	D−Ly−R
Lus10021299	93.6667	229.667	380.083	225.029	65.3333	198	288.043	207.15
Lus10031768	307	230.333	253.941	382.904	222.667	242	152.483	320.447
Lus10013393	202.333	64.6667	579.258	22.2211	336	62	1087.97	42.3322
Lus10034306	1419.67	1533.67	2781.91	3027.89	1342	1741.67	2987.85	2893.58
Lus10034519	54.3333	85.3333	32.5424	74.0452	65	108.333	59.5995	105.277
Lus10004215	4	1	1.71432	2.38527	2.66667	1.66667	4.06664	2.39403
Lus10029419	7.66667	8.66667	4.115	4.39918	7.66667	8.33333	7.79848	8.54175
Lus10023586	13.6667	2	1.02812	1.02354	14.6667	2.33333	2.03078	1.02546
Lus10021241	2	408.667	9.24974	37.4919	1.33333	239.333	21.3241	22.119
Lus10008429	595	198.333	1168.82	153.418	915.667	205.333	1330.57	176.955
Lus10040474	177	13.3333	756.949	17.7483	185.333	22.3333	1472.31	27.0052
Lus10019386	844.667	117.667	600.644	163.535	775	137.333	381.566	99.1303
Lus10001599	3.33333	50.3333	4.45559	56.2863	4.66667	84	2.03247	42.1242
Lus10005653	2.66667	2.33333	235.42	4.10583	3.33333	4.33333	178.608	2.72818
Lus10016974	392.667	160	258.053	238.254	251.667	127	224.293	229.814
Lus10038721	1.33333	167.333	2.73942	193.938	3.33333	201.667	3.3852	144.849
Lus10031190	575.333	291.333	639.515	428.512	547	321.667	499.213	384.481
Lus10024332	321	251	599.369	174.102	313	246	705.916	166.65
Lus10033152	20	57.6667	16.4437	35.5155	20	49	18.9636	29.4081
Lus10009359	3225.67	168.333	2912.13	196.592	4605	152	3940.79	161.785
Lus10019342	1822	85	833.415	145.622	2850	92	1892.26	125.791
Lus10019710	2	22.6667	3.43183	18.074	1.66667	24.6667	3.38351	11.2979
Lus10042829	1	1.33333	1.02812	2.04797	1.33333	1	1.6926	2.73329
Lus10023673	1	1.66667	2.05288	1.02354	1.33333	3.33333	2.03078	1.02546
Lus10035700	1	1	1.02812	1.02354	2	1	1.35442	1.36856
Lus10009513	6	61.6667	1.02812	8.83596	32	84	2.36896	6.4984
Lus10029512	696	30.6667	845.359	50.7868	621.333	30.6667	699.31	19.5117
Lus10029513	4959.33	258.667	4765.79	448.509	4232	252	4656.84	203.599
Lus10042482	38.3333	11.6667	1227.66	17.7474	36.6667	14.6667	2483.83	13.6894
Lus10011750	1.66667	1.33333	8.90849	1.36084	1	1	6.09742	1.02546
Lus10035696	5133	62	210.026	112.898	3864.67	86.6667	373.478	109.929
Lus10008443	1.33333	1.33333	5.1381	2.03721	1	1.33333	3.0521	2.40039
Lus10016410	1150.67	990.667	1064.82	812.565	1157.67	847.333	1689.63	683.835
Lus10042481	40.6667	16	1048.73	17.7977	29.3333	8.33333	2211.07	17.8332
Lus10037286	253	10.3333	89.053	13.3904	423.667	20.3333	181.952	43.8463
Lus10026185	83.6667	26.3333	5026.48	31.3675	69.6667	26	9476.34	24.3481
Lus10002399	862.333	88.3333	4329.77	173.398	524	87.6667	6235.45	166.718
Lus10006489	464	265	2920.75	1356.66	383.333	242.333	2506.55	810.502
Lus10024182	1	1	1.02812	1.02354	1	1	1.01624	1.02546
Lus10015428	1	1.33333	1.02812	1.36084	1	1.33333	1.35611	1.36346
Lus10014066	695	511.333	9042.33	730.493	548.667	431	8673.71	655.671
Lus10009755	286	370	1935.5	1028.06	224.333	316.333	1816.61	643.687
Lus10011888	1.33333	2.66667	1.02812	2.03721	1.66667	2.33333	1.01624	2.72692
Lus10017049	73	21.3333	81.2059	8.17583	68.6667	21	111.407	9.53655
Lus10012572	1	1.66667	6.49687	2.7531	1.33333	1.66667	6.76871	1.36983
Lus10022820	3	1	1.02812	1.69903	1.66667	1.33333	1.01624	1.02546
Lus10008928	94	74.6667	102.097	67.9306	80.3333	84	106.355	61.5162
Lus10041521	1	1.33333	1.7113	1.02354	1	1	2.03247	1.02546
Lus10019850	172.333	183.667	2775.03	245.11	146.333	154.667	2657.18	172.264
Lus10027897	570.667	105	2331.91	132.937	523	96.3333	3508.12	123.721
Lus10010093	143	156.667	260.101	151.798	135.333	143.333	286.91	195.273
Lus10007215	128.333	127.667	181.256	112.98	141.333	129	209.693	151.122
Lus10010281	1	1.33333	3.08503	1.36084	1	1	3.3852	1.36983
Lus10036344	1	1	1.02812	1.02354	1	1	1.01624	1.02546
Lus10000500	2.33333	1	21.9254	1.69903	9	1	29.4776	2.04582
Lus10017373	7	216	9.59605	198.621	10	175.333	5.08119	271.094
Lus10000640	705.667	835.667	1498.77	730.095	778.333	642.333	1506.96	675.443
Lus10035154	262.333	240	797.867	718.846	330	405.333	1231.63	923.861
Lus10040999	24.3333	542	61.3714	807.298	46.3333	529	76.8586	1298.5
Lus10032557	529	292	3854.92	383.195	563.333	292	4015.62	459.639
Lus10031986	592.333	484	1213.24	1123.76	613.667	532.667	1232.5	925.958
Lus10037191	5	91.3333	3.08134	46.2756	4.33333	108.667	10.1641	27.3011
Lus10023605	44.3333	62.6667	128.119	25.5069	110.333	62.6667	209.279	16.3947
Lus10008623	128.333	236	52.4421	130.146	155.667	213.667	46.0553	132.201
Lus10031386	2.66667	24	7.53608	13.6164	7.33333	31	33.5138	15.0071
Lus10010167	2	166.333	5.48035	226.348	2.33333	143.333	2.70715	209.359
Lus10010279	705	782.333	1893.68	913.449	734	533	1925.23	1152.6
Lus10040539	443	507	1061.54	450.564	534	489.333	1284.39	511.465
Lus10043186	229.333	368.333	2700.12	335.173	276.333	300	3457.05	286.144
Lus10010166	19.3333	7	5.83035	3.77753	19.6667	8.33333	2.37066	3.76769
Lus10035933	196.333	168.667	341.962	162.749	207	182	335.773	175.343
Lus10017372	14.3333	8.66667	7.5477	5.12937	15.6667	10.6667	8.12313	5.81735
Lus10042193	1002	1869.33	578.967	977.517	942.333	1553.67	498.636	1138.78
Lus10013445	34	663.667	56.553	1050.53	67.6667	672	54.1937	1634.34
Lus10024234	87	83.6667	140.539	23.7999	127	97.3333	192.679	20.4837
Lus10010944	6.33333	43	29.4509	28.2385	10.6667	56	50.7882	42.9881
Lus10025728	172.667	153.667	219.338	158.974	179.667	150.667	218.202	170.607
Lus10037513	1	1	1.71499	1.02354	1	1	1.01624	1.02546

## Sheet: benzylaminopurine
	M−Fn−L	M−Fn−R	D−Fn−L	D−Fn−R	M−Ly−L	M−Ly−R	D−Ly−L	D−Ly−R
Lus10017183	74.6667	73.3333	61.6949	46.709	87.3333	59.3333	69.4372	48.4775
Lus10041820	41	33	286.158	33.8012	47.3333	26.3333	328.6	41.0823
Lus10028371	1.66667	21	58.2581	13.2846	2.33333	18.6667	111.074	10.6079
Lus10018059	35	2	324.896	4.44224	35.3333	3	286.557	2.73455
Lus10028869	60.3333	23	30.8312	18.0757	55	20	39.2798	24.634
Lus10008951	588.333	33.6667	434.961	351.061	595.667	56.6667	275.651	251.104
Lus10042055	373	188	507.298	176.241	377.667	173.667	501.194	185.023
Lus10021127	65.3333	65.3333	48.3355	43.5747	76	55.3333	41.6539	39.6296
Lus10000022	1	1	1.02812	1.02354	1	1	1.01624	1.71419
Lus10029498	332.333	372	27.7682	101.83	424.667	364	37.9203	138.509
Lus10005625	1.33333	1	1.37156	1.02354	1	1	1.01624	1.36346
Lus10039600	951	599.667	421.155	183.322	1064.67	634.333	711.52	241.745
Lus10023995	1791.33	516.333	195.738	66.3732	2768	685.333	145.063	72.5492
Lus10004158	1	1	1.02812	1.02354	1	1	1.01624	1.02546
Lus10003377	163.333	210.333	140.855	110.639	189	211.667	102.593	81.8676
Lus10008164	6	3	3.43032	2.03544	7.33333	3.66667	3.04533	1.71166
Lus10032965	330	394.333	103.204	310.465	348	368.333	72.513	324.395
Lus10027993	37.6667	137.667	9.24589	104.493	32.6667	88.3333	12.8543	70.0339
Lus10015386	266.667	283	167.248	251.516	271	268.333	170.719	255.562
Lus10028498	90	160	6.16319	26.3458	117.333	127.333	10.5006	23.4811
Lus10009147	669.667	488.667	1157.13	719.719	803.667	421.333	1242.22	977.864
Lus10035723	126.333	281	67.1471	60.371	159	269.333	61.9956	60.3712
Lus10034811	598.333	443	214.213	375.057	642	533.333	165.978	295.95
Lus10037309	9	35.3333	21.9312	8.49866	14.6667	27	4.73962	6.47042
Lus10033356	222	147.333	28.1023	105.1	197	172.333	30.1591	62.1313
Lus10010215	943	1041	176.242	397.399	853.667	938	138.137	340.822
Lus10017412	178.667	735	25.3769	283.325	133.667	619	38.2551	202.193
Lus10017413	32	120.667	6.84955	48.5998	29	136.667	9.82081	31.6594
Lus10039649	1047.67	87	997.901	45.4441	1176.67	141.667	1906.59	23.8586
Lus10018654	895.333	1233	1994.58	712.87	989.667	829.667	1828.51	531.566
Lus10011732	1461	168.333	542.045	122.755	1910.67	201.667	411.165	122.101
Lus10007718	206.667	468	1350.37	272.386	253.667	335.333	1322.88	177.594
Lus10007319	309.333	363	567.646	382.483	275.667	369	597.306	404.588
Lus10016307	490	698	736.675	709.962	505	672.333	786.882	710.827
Lus10014327	174.667	98.6667	79.5037	76.0923	163	70.6667	50.1389	69.2839
Lus10005419	89	199.333	169.643	233.185	77	211.667	151.081	197.884
Lus10029270	328.333	334	787.429	418.277	258.333	319	1142.48	480.387
Lus10026036	294	197.333	199.402	172.616	294.667	175.667	167.681	181.652
Lus10010795	329.667	397	386.968	277.449	361.667	411.667	423.8	284.626
Lus10015238	196.667	258.333	337.258	336.56	182	284.667	335.776	301.615
Lus10014326	11.3333	3	2.05288	2.73334	8.66667	4	2.70884	4.43727
Lus10021857	356.667	872	561.396	455.434	386	814.667	646.941	458.82
Lus10010332	734.667	1342	878.478	984.073	672.333	1189	866.644	907.692
Lus10031812	30.6667	16	14.0389	9.88015	31	25	28.7861	9.57731
Lus10031241	9.33333	49.6667	7.19013	23.8824	10.6667	62	12.8661	17.7529
Lus10031813	19.3333	11.6667	7.88844	6.85893	10	14	3.38689	3.41565

## Sheet: cytokinin
	M−Fn−L	M−Fn−R	D−Fn−L	D−Fn−R	M−Ly−L	M−Ly−R	D−Ly−L	D−Ly−R
Lus10016363	20.3333	92.6667	78.4431	54.1427	27	97.3333	130.745	36.5887
Lus10034334	1	3.33333	1.37156	3.09216	1	1.66667	1.01624	2.39655
Lus10031188	1.66667	66.6667	1.02812	21.0063	1.33333	33.6667	3.38351	4.08018
Lus10031778	1.66667	5.33333	47.9699	2.38527	1.33333	3.66667	63.6645	3.42712
Lus10018039	13	38.3333	13.3725	17.6611	18.3333	50	14.2206	8.51619
Lus10028015	51.3333	134	61.3408	407.761	41.6667	72	34.8767	270.404
Lus10038065	318.333	34.3333	30.8597	25.8352	314.333	52	38.6153	29.3751
Lus10039574	419.667	190.667	291.28	269.079	405	226	255.353	274.64
Lus10012372	37.6667	27.6667	8.57128	66.3593	41	31.3333	10.1522	46.1078
Lus10019762	16.6667	68	33.9178	54.036	23.3333	56.6667	37.9068	31.2444
Lus10005317	12.3333	84.6667	43.8282	116.931	24	115.667	31.4746	49.9274
Lus10038066	130.333	15	13.7097	9.84874	168	27.6667	20.9977	9.57731
Lus10004428	1.66667	130.333	18.1592	156.056	2	100.667	10.1539	100.675
Lus10027611	3.33333	2	1.02812	1.36084	7.66667	1.66667	1.01624	1.36346
Lus10024289	808.333	189.333	381.696	79.2034	417	142.333	174.118	53.6581
Lus10026471	1539	96.6667	649.905	113.193	1183	151.333	521.974	181.443
Lus10031200	1.66667	25.6667	4.45492	18.4148	1.33333	42.6667	9.49447	53.6389
Lus10042035	3.33333	3.66667	90.8263	3.40793	2.66667	2.66667	109.404	3.74986
Lus10034025	7.33333	123.333	14.0553	102.869	4	102.333	2.71222	64.4373
Lus10031765	434.333	422.667	504.461	564.161	410	431	534.226	687.051
Lus10034333	1	2	1.36971	1.02354	1	2	1.01624	2.73839
Lus10003845	209.667	7.33333	1119.71	20.985	354.333	11.3333	697.054	30.8454
Lus10035433	13.6667	25.3333	5.14128	12.5328	10.3333	25.3333	7.78833	5.12095
Lus10034332	1	3.33333	1.02812	1.02354	1	2	1.01624	2.03946
Lus10031046	13	16.3333	10.6278	26.6875	17.3333	19.6667	10.8438	31.7907
Lus10020566	37	75.3333	161.092	198.35	71.6667	102.667	350.304	330.984
Lus10006281	66.3333	194	94.2639	335.805	60.3333	153.333	96.5493	389.604
Lus10035114	1	1.33333	9.93894	1.02354	1	1.33333	7.45015	1.02546
Lus10028992	2.33333	48.6667	2.39632	20.4656	3.66667	42.6667	4.40144	27.2399
Lus10020114	1.33333	11	2.05473	4.78131	1.66667	7.66667	1.6926	9.53402
Lus10015773	1426	1105	2583	1336.28	1433.33	1368.67	2579.65	949.104
Lus10035113	2	2	13.0289	1.36173	1.66667	2	16.2513	1.36983
Lus10031985	612.667	727.333	390.765	423.451	543	636	308.919	413.983
Lus10037032	1572.33	663.667	3142.25	1005.45	1565.33	870.333	3133.52	659.013
Lus10012325	1152	348.667	112.078	214.932	1315	495.333	38.2907	157.069
Lus10013250	135.667	349	74.0189	166.575	102.333	342	100.941	151.936
Lus10006370	988.333	232.667	201.551	152.708	937	283.333	70.4805	85.306
Lus10020115	5	27.6667	3.42595	14.3009	9	28.3333	4.74131	28.1736
Lus10031600	1	1	1.02812	1.02354	1	1	1.01624	1.02546
Lus10009736	1	1	1.02812	1.02354	1	1.33333	1.01624	1.02546
Lus10003686	14.3333	100.667	5.14146	53.086	17.3333	116.333	5.4126	60.7103
Lus10000105	8	16.6667	5.83035	9.88915	7.33333	13	4.7447	21.1113
Lus10029849	2.33333	2656.33	2.74245	1563.82	3	1618.67	1.01624	690.75
Lus10003256	2.66667	8	1.71466	3.06163	3	8.66667	5.75078	5.79442
Lus10026917	65.6667	113.333	25.017	74.591	63	95.6667	21.6656	107.015
Lus10033746	1	1	1.71499	1.02354	1	1	1.35442	1.02546
Lus10000137	1.33333	8.33333	1.37156	5.76532	1.33333	5.66667	1.35442	9.18329
Lus10035596	2.33333	16.6667	4.11349	7.4797	2.66667	12.6667	5.41937	9.24957
Lus10028438	136.333	542.667	80.9081	822.06	137	442.667	56.2262	442.456
Lus10030772	202.333	332	51.3794	283.792	135.333	332	35.5852	169.884
Lus10041891	59.6667	2078	21.9503	2735.94	61.3333	1402	18.9686	1211.76

## Sheet: Ethylene
	M−Fn−L	M−Fn−R	D−Fn−L	D−Fn−R	M−Ly−L	M−Ly−R	D−Ly−L	D−Ly−R
Lus10015153	49.6667	553.333	4.45256	201.31	34	430.667	13.206	228.899
Lus10032574	318	413	1030.97	542.779	310.333	425.333	1085.21	606.576
Lus10027586	111.667	99.6667	571.934	277.16	113	114.333	751.931	262.542
Lus10005037	4.66667	12.3333	85.2652	6.78004	6.33333	8	263.139	7.19228
Lus10013069	64.3333	133.333	532.24	701.139	38.3333	135	873.791	976.51
Lus10000711	1685.33	735	1593.41	1013.21	1941.33	852.667	1439.71	1066.28
Lus10001460	1	273.667	1.02812	12.8511	1	219.667	1.35442	11.5697
Lus10042999	1	1	1.02812	1.02354	1	1	1.01624	1.02546
Lus10022192	815.667	673.333	759.789	1357.37	235.667	708.333	254.105	1008.54
Lus10021202	79	142.667	43.5023	150.582	70	128	22.0393	194.019
Lus10013136	1	8	1.02812	6.54051	1	7.66667	1.01624	10.923
Lus10013135	1	1	1.02812	2.37362	1	1.66667	1.01624	1.02546
Lus10004245	2	1	15.7708	1.02354	4.66667	1.33333	42.0344	1.71419
Lus10028068	1	1.33333	1.71499	2.03544	1	2	1.01624	1.02546
Lus10035334	3804.67	1350.33	19181.7	611.952	3002	1341	11815.9	302.626
Lus10006350	1	1	1.02812	1.36173	1	1	1.01624	1.02546
Lus10030934	2.33333	3.33333	145.361	7.79635	3.33333	4	181.228	9.94082
Lus10027585	627.667	154.333	3030.11	814.67	573.333	231	2819.42	1055.65
Lus10033877	1	3	1.02812	6.76999	1	24	1.35442	14.5747
Lus10017701	25.6667	52.3333	30.8542	47.4886	28.6667	30.3333	50.1457	44.1013
Lus10004746	767.667	353.333	640.785	580.738	820.667	315.333	785.775	664.709
Lus10011979	153	12	80.8645	49.7189	89	12	18.994	7.12727
Lus10040380	552.333	30.3333	39.3945	87.59	1072	106.333	50.4974	16.7633
Lus10030995	1.66667	1	1.37122	1.02354	1.33333	1	2.03078	1.02546
Lus10023851	154.333	178	133.672	174.107	170	164.667	82.3761	199.212
Lus10021002	11.6667	6.66667	6.16722	5.78244	8.66667	49.3333	8.45793	12.8669
Lus10001103	10	34.3333	26.7241	10.17	6.33333	27.6667	50.7899	9.25089
Lus10011985	205.333	212	123.724	210.937	175	169	114.471	232.29
Lus10008822	26	1.33333	1.71281	1.02354	27.6667	2.33333	1.01624	1.02546
Lus10000426	1	1	1.02812	1.02354	1	1	1.01624	1.02546
Lus10001108	183.333	1803.33	29.1084	2300.3	274.667	1530	18.6169	1311.96
Lus10020596	1	1	1.02812	1.02354	1	1	1.01624	1.02546
Lus10001118	1	1	1.02812	1.02354	1	1	1.01624	1.02546
Lus10008097	1.33333	139.667	1.37122	62.754	2.66667	129.667	2.36896	37.8198
Lus10001711	1047	296.667	675.838	254.789	1098	285	343.345	292.32
Lus10022190	1087.67	711	1130.42	843.312	1389.33	651.667	792.682	689.254
Lus10025619	1	1.33333	1.02812	1.02354	1	1.33333	1.01624	1.02546
Lus10022191	651.333	899	542.107	2412.04	244	984.667	194.081	1630.35
Lus10000610	1	1.33333	1.37156	1.02354	1	1.33333	2.03247	1.02546
Lus10039975	21.3333	44.6667	9.25782	15.7085	35.3333	44	6.7721	16.0363
Lus10009238	121.333	113.667	39.4164	89.9439	92.6667	110.667	34.1936	176.439
Lus10011987	1	172	3.7709	378.764	1	150	12.183	297.987
Lus10037796	1	1.33333	2.40153	1.02354	1	2.33333	2.03078	1.02546
Lus10022197	144.667	158.667	56.5631	105.264	140.333	150.667	55.2404	93.9675
Lus10019435	255	1.33333	6.85678	1.02354	286.333	1	9.13937	1.02546
Lus10023602	1	1	1.37156	1.36173	1	1	1.01624	1.02546
Lus10006722	1	1	1.02812	1.02354	1	1.33333	1.01624	1.02546
Lus10011986	1	58.6667	2.74429	46.4464	1.66667	57	8.79949	45.8972
Lus10007640	1	1	1.02812	1.02354	1.33333	1.33333	1.35442	1.02546
Lus10021204	41.6667	41.3333	29.8083	41.1921	48	47.3333	24.7245	63.2649
Lus10026801	36.3333	5.66667	8.21271	5.77256	47.3333	8.66667	15.5868	11.3082
Lus10032502	1	1	1.02812	1.02354	1	1	1.35442	1.02546
Lus10031898	503	350.667	530.142	632.595	464.333	319.667	683.792	725.727
Lus10032930	840	160.333	247.143	409.379	470.333	191	290.397	419.422
Lus10013134	1	1	1.02812	1.02354	1	1	1.35442	1.02546
Lus10036539	1	5.66667	1.36971	3.06975	1	12.6667	1.6926	3.07639
Lus10038498	8.33333	25	31.5243	39.4159	13	41	33.8419	36.107
Lus10004808	33.3333	446.333	136.724	1783.58	15.6667	424	298.495	2295.71
Lus10022196	745	343	79.5196	85.7223	788.667	263.333	44.6992	51.5373
Lus10028678	35.3333	648	47.9671	526.704	32.3333	742.333	35.5734	580.89
Lus10041390	3	3.66667	1.02812	1.69814	1.33333	5.33333	1.35442	1.70656
Lus10034032	2.33333	43.6667	1.71314	11.2203	1.66667	35	1.35611	25.0832
Lus10042493	2.66667	32	2.0544	30.284	1.66667	33.6667	2.71222	23.1252
Lus10002892	17	258.333	15.732	118.802	42.6667	231.333	15.2334	255.18
Lus10014134	64	5.33333	20.9244	6.4588	53	6.66667	16.598	4.10311
Lus10013314	1	1	1.02812	1.36173	1	2	1.01624	1.71166
Lus10000612	1.66667	1	1.37122	1.36084	1	1	2.37066	1.02546
Lus10008826	12.3333	21.6667	9.59502	11.5774	11	19	4.73793	22.8956
Lus10011981	40.6667	63	8.91859	184.996	38.6667	114.667	3.0521	158.194
Lus10031865	1	1	1.02812	1.02354	1	1	1.01624	1.02546
Lus10025620	39.6667	2	36.6632	1.02354	86.3333	2.33333	68.7473	1.02546
Lus10002894	1.66667	42.6667	1.36971	7.46629	1.66667	62.6667	1.6926	12.8911
Lus10024882	634	738.667	106.24	782.166	543.667	774.333	78.3501	862.262
Lus10035782	16	1	5.14515	1.02354	11.3333	1	3.72508	1.02546
Lus10017080	1	1	3.42629	1.02354	1	1	4.743	1.02546
Lus10011476	53	118.667	5.4869	36.635	47	103	5.41937	29.2641
Lus10023499	85.6667	1	1786.97	1.36173	282.333	2	3028.65	1.36346
Lus10014398	59	595	8.57213	1662.34	46.6667	949.333	26.7908	1708.43
Lus10036082	113.667	45.3333	29.4866	47.1215	103.333	56.3333	23.0522	45.4546
Lus10035702	93	28	86.0671	41.951	78	36.3333	77.5265	46.1649
Lus10022195	229.333	411.667	1672.03	442.516	202.667	391.667	1849.99	513.772
Lus10008824	215.333	381	100.769	205.077	199.667	320	80.3335	273.991
Lus10022189	637.667	163	663.951	512.468	745	174.333	655.487	565.972
Lus10018372	1	2	1.71281	18.7915	1	1.33333	1.35442	6.5125
Lus10022292	269.667	585.667	56.897	1098.72	233.333	611.667	87.7904	1199.06
Lus10004387	317.667	332	416.671	607.47	353.333	295.667	368.306	575.673
Lus10034964	712.333	274.333	1768.16	306.337	668.667	306	1792.47	359.599
Lus10012963	947	320.333	2035.1	333.011	999.333	306	2148.38	445.667
Lus10031054	139	143	72.6646	161.783	132.667	140.667	47.4554	187.323
Lus10020999	356.333	438.333	238.515	404.021	345	357.333	142.684	323.08
Lus10003459	1	1	1.02812	1.02354	1	1	1.01624	1.02546
Lus10006759	9	4.66667	39.7678	1.69903	4.33333	3.33333	20.6545	1.71166
Lus10021203	16.3333	196.667	2.39968	100.964	13.3333	310.333	9.47586	114.578
Lus10021943	390.667	360	402.344	361.613	449.333	338.667	614.392	410.897
Lus10016145	1	1818.33	2.39598	2250.2	1.33333	1834.67	4.05987	2938.48
Lus10007818	3717.33	454	22610.8	802.974	4765	419.667	16678.5	910.774
Lus10006709	7	15.3333	30.1435	18.4462	5.66667	15.6667	42.0107	13.6613
Lus10022415	894.333	15.3333	249.811	51.1242	468.667	22.3333	241.251	67.8129
Lus10015016	3.33333	2.66667	1.37122	2.04797	2	3.66667	1.01624	2.73329
Lus10011002	275.333	17.6667	263.841	44.0447	295.333	25.3333	218.552	31.9846
Lus10041230	4.33333	4.66667	4.45795	8.21712	6.33333	6.33333	5.08119	14.016
Lus10040382	30	6.66667	747.999	9.26131	14	5.33333	775.741	31.1745
Lus10023600	1	1	7.88624	1.36173	1	1.33333	8.47485	1.36346
Lus10018949	1	2	1.02812	8.46371	1	1.66667	1.01624	10.168
Lus10000611	5.66667	125.333	5.82866	254.948	6	140.667	7.78833	324.139
Lus10033878	1	1	5.14431	1.02354	1	1	6.43053	1.02546
Lus10009663	2.66667	56	5.14431	53.037	2	64	15.5733	80.8484
Lus10023311	224.333	389.667	19.5426	535.313	286	401	37.2609	420.876
Lus10041912	2.33333	1.33333	1.71432	2.03632	1	1.33333	1.35611	2.05603
Lus10018836	39	15.6667	23.9933	40.3597	37.6667	17.6667	20.9977	44.831
Lus10008100	1	7	1.02812	9.18226	1	10.3333	1.01624	15.0248
Lus10008099	1	1	1.02812	1.02354	1	1	1.35442	1.02546
Lus10006518	19	1318.67	40.8142	368.634	27.6667	1378.33	51.517	294.653
Lus10027807	5.33333	81.6667	167.906	76.8866	1.33333	43	167.911	40.0161
Lus10022193	187.667	227	292.025	262.553	154.333	246	238.532	284.205
Lus10037292	334	420.667	717.946	651.043	329	367	685.992	700.857
Lus10004888	1	4.33333	1.71314	1.02354	1	2	1.01624	1.02546
Lus10029992	15138.3	2161.33	30375.3	2875.88	10673.7	2351.67	20623.9	1935.68
Lus10002888	22.6667	486.333	11.2986	504.545	35.3333	292.333	6.44745	296.538
Lus10025369	10	1.66667	7.19855	2.72345	10	4.33333	5.75417	3.07896
Lus10023890	3	129.333	1.02812	212.84	1.66667	164.667	2.03078	202.593
Lus10015573	145	433.667	272.712	1167.42	89.6667	510.667	387.197	1448.16
Lus10007820	796	456.333	1416.83	617.15	749.667	378	1335.36	711.708
Lus10031530	23.6667	727.667	21.2194	470.772	16	778.333	35.5446	628.823
Lus10033875	1.33333	18.3333	1.02812	11.9982	1	19	1.35611	6.48057
Lus10018950	1	5.66667	1.36971	14.9954	1	2.33333	1.01624	4.41818
Lus10000857	8.66667	475.667	16.104	341.492	11	564	34.875	446.415
Lus10004511	1	17	1.02812	20.8361	1.33333	22	1.01624	17.1
Lus10041913	1	1	1.02812	1.02354	1	1	1.01624	1.02546
Lus10008564	28.6667	5706.33	11.6521	776.501	22.3333	3507.33	11.8465	551.782
Lus10030567	2	18.3333	3.76872	61.1094	3.66667	14.6667	4.73793	58.4053
Lus10001109	160.333	442	31.461	172.957	216	432.333	18.6152	174.224
Lus10005202	1	1	1.02812	1.02354	1	1	1.01624	1.02546
Lus10033879	1	1	1.36971	1.02354	1	1	1.01624	1.02546
Lus10029081	36	89	66.4658	454.274	24.6667	105.333	104.628	538.431
Lus10012912	1.66667	4.66667	7.53341	8.82696	3.66667	6	7.11197	9.59767
Lus10024230	3	23.3333	135.725	10.5269	7.66667	128	265.216	27.6557
Lus10030185	8.66667	1.66667	68.5956	2.03632	23	2.33333	50.4077	1.71419
Lus10027399	216.333	27.6667	1.36971	14.6032	91	23.6667	1.01624	30.7449
Lus10011980	75.6667	66.3333	88.0295	329.762	55.3333	106.667	73.8641	332.718
Lus10040112	3.33333	1.33333	51.4526	4.07353	4.33333	1.33333	64.679	2.39529
Lus10023850	27	34.6667	14.7427	33.3643	26.3333	31.6667	10.8472	39.2776
Lus10026173	15	384	46.6283	724.253	20	475.667	40.3401	1015.03
Lus10030941	714.333	54	6627.21	146.548	805.667	123	11143.3	211.205
Lus10031671	84.6667	49	8.23054	26.1923	52	37.3333	3.72508	41.8911
Lus10015252	14	1655.67	10.9639	1225.86	15.3333	1451	12.5381	825.94
Lus10032683	1.33333	26.6667	9.59602	4.39742	2	11	12.1932	3.41439
Lus10023601	1	1.66667	5.1401	1.36173	1	3.33333	7.79172	2.73202
Lus10031325	558.667	401.333	403.035	446.791	492.333	373	479.899	480.855
Lus10031150	1	2075	24.9407	716.935	1	1084.33	13.529	1230.44
Lus10007714	1.66667	2.33333	31.5469	2.7118	1	3	75.8661	1.02546
Lus10024673	150.667	210.667	125.741	207.72	148.333	178.667	382.271	235.964
Lus10010243	1	4.66667	1.02812	8.46106	1	1	1.01624	2.73839
Lus10032301	167.333	125.667	217.038	308.705	117.333	204	237.914	424.782
Lus10032695	1	24	1.02812	27.2066	1	55.6667	1.01624	24.5791
Lus10007910	11.6667	167.333	854.818	158.272	10.3333	224.667	1397.63	165.956
Lus10008579	1	11.3333	1.36971	17.009	1	29.3333	2.03078	7.82746
Lus10036396	6.33333	23	87.7552	38.0534	2.66667	39	184.218	41.9561
Lus10007021	1451.33	103	1545.91	159.232	1790.33	125.667	1296.09	172.517
Lus10007223	2	15.3333	2.39632	3.39628	1	17.6667	2.71391	2.73839
Lus10017521	27.6667	172.333	85.3492	150.017	20.6667	157.667	68.1116	78.8714
Lus10028760	75.3333	87.3333	90.4726	264.76	93.6667	111.333	107.412	85.5388
Lus10038899	107.667	33.3333	25.3547	31.7352	101.333	35	45.6918	21.434
Lus10011565	2.33333	14	1.02812	2.37274	1	11.6667	1.01624	3.07386
Lus10015023	65.3333	33	31.1843	34.2382	70	28.3333	35.8913	25.5881
Lus10039647	3.33333	27.3333	1.36971	99.7903	1	59.6667	3.04702	75.7754
Lus10007249	1	1	1.02812	1.02354	1	1	1.01624	1.02546
Lus10006676	588.333	145.667	162.438	296.419	554.667	168.333	279.376	391.331
Lus10011796	1	1	1.02812	1.02354	1	1	1.01624	1.02546
Lus10032682	1.33333	7	1.71281	2.72257	2	3	3.38351	2.05603
Lus10018623	87	184.667	146.375	467.869	91.6667	183.333	243.586	679.285
Lus10022009	506.333	446.333	1134.57	713.999	487.333	509.333	960.071	638.917
Lus10011830	1	1	1.02812	1.02354	1	1	1.01624	1.02546
Lus10027469	3.66667	10	1.02812	4.44224	2	5.66667	1.01624	9.85419
Lus10042557	2.66667	45.3333	1.71281	38.5216	1.66667	43.3333	4.743	39.6844
Lus10043182	482.667	289	612.711	983.203	643.333	388.333	534.238	1153.59
Lus10005517	3.66667	1045	1.71499	629.1	3.66667	778.333	2.36896	672.375
Lus10007841	24.6667	38.6667	238.201	136.043	29.3333	51.3333	380.073	156.198
Lus10014655	2	14.6667	5.14061	27.2178	1	14.3333	4.39806	15.7403
Lus10011829	52	43.3333	27.0945	32.2396	19.3333	28.6667	14.2138	22.2273
Lus10041372	3.33333	7.33333	3.08588	4.76066	3.66667	7.66667	2.37404	1.02546
Lus10007357	467.333	378.667	484.134	417.025	465.333	431	405.024	435.805
Lus10016815	1	4.33333	2.40186	12.3436	1	5	1.01624	10.2853
Lus10033664	209.333	253.667	1484.06	385.753	145	261.667	1491.74	629.001
Lus10015415	1091.33	3018.33	1011.42	7208.92	1158	3188	288.965	6090.32
Lus10021193	46.6667	74	142.571	63.6979	17	60.6667	108.022	68.4546
Lus10016227	5	1	1.37122	1.02354	4.33333	1	1.01624	1.02546
Lus10035076	1	1	1.36971	1.02354	1	1	1.35442	1.02546
Lus10028679	50.6667	834.333	1252.94	1644.66	69.6667	1176	1894.98	2703.46
Lus10033885	6.33333	8.66667	4.45005	4.73913	6.33333	8.66667	2.37066	2.04966
Lus10031382	512.667	564.667	382.773	630.345	482	556	309.995	633.969
Lus10011831	2	5.33333	3.77293	1.69814	1.66667	3.33333	3.38689	1.02546
Lus10040165	151.667	293.333	97.6257	496.714	229.667	459.667	242.537	736.725
Lus10039857	275	491.667	959.245	1274.13	252.667	484	1480.61	1674.87
Lus10013415	432.667	1640.33	264.202	1155.96	303.333	1360	284.21	1288.17
Lus10016211	1	38.3333	1.02812	84.7117	1	39	1.01624	61.2455
Lus10032499	3985	3850.33	4140.3	6488.42	5191.33	4895	3347.11	9640.84
Lus10013958	1.66667	5.66667	8.23119	3.78741	1	9.66667	5.75755	13.289
Lus10004368	443.333	1051.33	1069.41	1109.22	451.333	1138.33	1244.32	1542.68
Lus10016245	34.3333	29.3333	46.2514	25.6236	38.3333	29.3333	22.7123	23.9491
Lus10005285	150.333	8.33333	700.895	13.3654	156	13.3333	868.435	43.4978
Lus10042996	3771	3633.67	2910.42	6904.31	4792.67	3833.33	2123.22	7989.84
Lus10032498	704.333	192.667	447.768	545.409	927.667	279	406.131	772.434
Lus10030261	1	2.33333	1.02812	10.5664	1	2.33333	1.01624	8.56216
Lus10033884	3.66667	12.6667	5.82899	12.5912	2.66667	8.66667	4.73962	7.18465
Lus10004369	17	1.66667	1.37122	1.02354	14	1.33333	4.05987	1.02546
Lus10003562	29.3333	158	17.482	103.936	18.6667	139	8.8198	70.7085
Lus10041159	286	295.667	282.775	262.966	301.333	314	223.554	304.035
Lus10031526	222.333	160.667	233.734	217.939	200.333	149.333	204.933	245.166
Lus10006579	2.66667	2.33333	61.7041	3.09128	1	3.33333	138.709	5.14388
Lus10029314	3.33333	1	1.37122	1.02354	4.33333	1	1.01624	1.02546
Lus10041614	3	25.6667	32.9071	61.0832	3.33333	29	51.867	84.9021
Lus10017907	1	1	1.37156	1.02354	1	1.33333	1.01624	1.02546
Lus10022203	30.3333	452	91.5745	355.915	11	448	28.1503	302.387
Lus10040167	14	4	2.0544	4.75801	12	3.66667	2.37573	4.76002
Lus10029331	1	31.3333	1.7113	20.4098	1	39	1.01624	32.996
Lus10021873	1	1	1.02812	3.05175	1	1	1.01624	1.36856
Lus10013959	101	154	867.721	263.377	120	197.667	1396.25	686.642
Lus10036556	1.33333	9	1.02812	3.38552	1.33333	6.33333	1.01624	1.70782
Lus10021196	1.66667	6.66667	13.3786	1.69903	1.33333	7	9.47417	1.02546
Lus10042549	395.333	307.667	547.109	336.377	349.667	310.333	470.244	313.165
Lus10042995	127.333	52.6667	49.3435	96.939	229.333	85.3333	80.5922	133.126
Lus10008291	2	117	1.02812	175.647	2.33333	151.333	1.35442	385.533
Lus10015296	71.3333	76	217.299	198.632	50.3333	93.3333	246.91	267.699
Lus10025430	12	40.3333	25.3689	61.71	7.66667	34.3333	23.6896	55.4987
Lus10004752	49	60	273.212	297.607	46.6667	70.6667	444.809	348.913
Lus10029318	1	53.3333	1.02812	13.193	1	36	1.01624	8.53276
Lus10005281	1	2	1.02812	1.37161	1	2.33333	1.6926	3.76385
Lus10021212	35	923.667	79.1912	528.121	19.3333	765.333	95.506	445.247
Lus10022935	817.667	820.333	168.365	2043.98	833	766.333	94.8195	2101.13
Lus10029333	1	13	1.37122	20.3747	1	16.3333	2.36896	22.1571
Lus10021880	106.333	143.333	85.7007	146.48	219.667	178.667	109.74	312.394
Lus10006574	32	1156.67	8.22616	627.631	19.3333	945	5.75755	677.897
Lus10022936	1.33333	4	1.02812	5.79232	1	2.33333	1.01624	11.6474
Lus10002314	1.33333	38	1.02812	26.4434	1	26.6667	1.35442	29.6964
Lus10022015	3.33333	70.6667	4.11249	132.242	2.33333	69.6667	4.40144	172.566
Lus10005149	1	6	3.42629	3.39805	1.33333	6.33333	4.06495	3.07255
Lus10020778	505	567	562.016	531.991	506	590	451.568	571.816
Lus10024883	2	7.33333	1.02812	18.0147	1	11.6667	1.01624	36.9983
Lus10035859	1	2.66667	2.73975	1.02354	1	2.33333	2.03078	1.02546
Lus10035329	456.667	463.333	725.675	564.05	420.333	358	816.481	877.823
Lus10005343	1.33333	19.6667	15.7697	2.71004	1.33333	13	23.3481	2.04966
Lus10010310	451.667	1684.67	373.261	1208.87	343	1615.67	272.369	1146.16
Lus10029987	491	454	500.024	486.548	503.667	402.667	514.247	680.905
Lus10034592	356	201	2779.28	642.782	309.333	82	1339.28	391.67
Lus10025987	1.33333	197.667	1.02812	96.7152	1.33333	167	1.69429	103.304
Lus10034940	395	481.333	826.834	322.835	464.667	489	787.516	401.627
Lus10007043	1463.33	1660	6774.56	997.141	1971.33	1099.33	6420.04	1087.29
Lus10033198	42	222.333	19.5342	78.1176	50	174	17.6074	72.0861
Lus10015896	272.667	723	509.578	795.154	262.333	521.333	582.879	554.774
Lus10014807	14.3333	61	29.132	12.8853	25.6667	47.6667	20.7002	11.2381
Lus10023669	669.667	459	336.692	209.662	897.333	496	379.045	166.254
Lus10038459	47.3333	40.6667	18.852	23.1449	73.3333	36.6667	24.7346	27.338
Lus10007613	398.333	535.333	876.465	1481.21	380	588	872.089	1507.22
Lus10038550	35.3333	92.6667	54.1707	77.2719	37.3333	76.3333	42.0411	62.8086
Lus10011105	62.3333	72.6667	17.4744	32.5614	36	33.6667	21.3444	19.4533
Lus10010013	87.6667	906.333	114.435	1457.82	3029	791	182.123	789.308
Lus10023347	102.333	85.3333	163.469	94.3582	88.3333	93	210.782	113.801
Lus10025033	26	1030.33	265.834	1049.96	793.667	808.667	682.137	493.948
Lus10018400	306.333	355	316.961	633.68	304.333	377	336.39	487.074
Lus10026589	1	9.66667	1.37156	3.05987	1	13.3333	2.03078	6.80968
Lus10024071	79	89.3333	57.5623	99.7853	65.6667	81.3333	54.2512	124.044
Lus10013874	1	9.66667	1.37156	3.73358	2.33333	5.66667	4.73793	3.40292
Lus10009272	361	1050	695.617	905.46	351.333	735.667	761.189	713.629
Lus10027064	122	248.667	36.3495	61.0562	181	236.333	11.5236	37.1362
Lus10010638	151.333	270	199.119	152.328	166.333	241.667	204.624	131.55
Lus10025599	315.667	210	65.7979	113.697	561.333	226.333	51.4645	111.643
Lus10005959	1	1.33333	1.71432	1.37161	1	1.66667	2.70715	1.02546
Lus10000056	120.667	111	219.613	120.023	118.333	80.3333	230.437	169.701
Lus10021776	276	250	2582.2	1002.92	228.667	196	1557.61	1178.65
Lus10041649	28.3333	45.6667	30.1533	49.7511	27	37	33.5612	60.9067
Lus10017945	930.667	756.667	1587.96	840.695	941.667	673.667	1614.65	887.68
Lus10013686	1194	1408	3195.9	1516.27	1254.33	1210.67	3481.07	1677.31

## Sheet: gibberellic acid
	M−Fn−L	M−Fn−R	D−Fn−L	D−Fn−R	M−Ly−L	M−Ly−R	D−Ly−L	D−Ly−R
Lus10023024	208	157	29.4593	429.762	88.6667	194	49.8109	288.375
Lus10027419	13	1.33333	1.02812	1.02354	10.3333	1	1.01624	1.70146
Lus10006575	1	1	1.02812	1.02354	1	1.33333	1.01624	1.71419
Lus10008097	1.33333	139.667	1.37122	62.754	2.66667	129.667	2.36896	37.8198
Lus10021025	5246	879	1180.86	75.0537	3166	784.667	225.754	19.0299
Lus10013130	8.66667	30.6667	1.02812	3.74788	10	31.3333	1.01624	3.39655
Lus10013132	4	121.333	1.02812	79.2639	4.33333	135.333	2.03078	61.0089
Lus10005516	1	1.66667	1.02812	2.39604	1	1.33333	1.01624	3.08401
Lus10016660	2.66667	1.33333	4.80272	1.02354	1	1.33333	4.73962	2.40292
Lus10023160	143	1.66667	415.098	1.36173	294	1.66667	573.654	1.71166
Lus10022047	109.333	3673.67	38.6829	3226.64	87.3333	3211.33	92.4421	2774.5
Lus10004323	1	1	1.02812	1.02354	1	1	1.01624	1.02546
Lus10042593	694.333	2045	617.994	2082.05	600	2604	652.426	2583.26
Lus10034233	1	1	1.02812	1.02354	1	1	1.01624	1.02546
Lus10006925	313.667	4	26.6969	21.2615	159.667	4	140.895	3.74476
Lus10006921	1	1.33333	1.02812	1.02354	1	1.33333	1.01624	1.02546
Lus10006917	1.33333	1	8.91016	1.37161	1	1.33333	16.2547	1.02546
Lus10000026	27	14.3333	62.0208	5.12037	30	12.3333	46.0401	6.83387
Lus10006350	1	1	1.02812	1.36173	1	1	1.01624	1.02546
Lus10006722	1	1	1.02812	1.02354	1	1.33333	1.01624	1.02546
Lus10036539	1	5.66667	1.36971	3.06975	1	12.6667	1.6926	3.07639
Lus10041390	3	3.66667	1.02812	1.69814	1.33333	5.33333	1.35442	1.70656
Lus10009025	1	8.66667	1.37156	8.18747	1.33333	10	2.03078	8.55574
Lus10007213	1	1	1.02812	1.02354	1	1	1.01624	1.02546
Lus10015016	3.33333	2.66667	1.37122	2.04797	2	3.66667	1.01624	2.73329
Lus10017799	1	1	1.7113	1.02354	1.33333	1	1.01624	1.02546
Lus10016659	23.6667	127	135.367	25.2577	36.6667	136.333	149.977	29.3915
Lus10038894	1	6.66667	1.02812	3.0491	2.33333	5.33333	1.01624	1.36346
Lus10027399	216.333	27.6667	1.36971	14.6032	91	23.6667	1.01624	30.7449
Lus10031671	84.6667	49	8.23054	26.1923	52	37.3333	3.72508	41.8911
Lus10023113	196.667	261	143.691	767.456	213.333	319.667	110.183	1034.27
Lus10013137	1	10	1.02812	10.9153	1	16.6667	1.01624	6.15788
Lus10009998	2.66667	118.667	3.07764	35.9238	2	110.333	7.79848	38.9001
Lus10038498	8.33333	25	31.5243	39.4159	13	41	33.8419	36.107
Lus10017094	6	165	56.1996	1045.47	5.66667	189	46.1027	695.93
Lus10025016	1.33333	3.33333	1.36971	3.05987	1	5.33333	1.35442	2.73202
Lus10037816	10.6667	242.333	184.019	1238.38	16.6667	189	215.789	773.089
Lus10004511	1	17	1.02812	20.8361	1.33333	22	1.01624	17.1
Lus10033060	258	563.667	34.9754	283.972	214.667	483	35.5717	277.553
Lus10021336	497	363.333	564.45	483.408	422.667	410.667	661.359	499.945
Lus10008189	518	653.667	511.668	517.055	408.333	637.667	602.884	639.94
Lus10000928	1744.33	734.667	1253.99	1319.24	2037	799	1397.34	1168.52
Lus10008188	413.667	404.333	421.798	348.54	380	513.333	458.162	326.072
Lus10029341	759	1200	49.3058	3154.83	738.667	1248.33	117.19	4511.78
Lus10017009	442.333	502.667	397.937	591.736	364	543.333	277.47	536.057
Lus10002254	1905.67	483.333	1205.55	1588.19	2044.33	608	1272.24	1298.72
Lus10009134	586.667	353.333	112.436	214.262	439	428.667	115.799	152.197
Lus10027969	854	722.667	1383.81	605.07	646.667	696.333	1370.33	600.953
Lus10018963	126.667	49.3333	97.0095	49.8173	128	47.6667	66.7233	51.2707
Lus10033061	43.3333	114.667	7.5418	75.6214	34.6667	102.333	3.38351	104.233
Lus10009421	142	2.66667	22.2623	1.37161	225.333	3.66667	48.7557	2.03946
Lus10042203	2.33333	26.3333	2.0544	7.78647	15	43.3333	5.76601	3.06618
Lus10017212	13055	8944.33	3782.33	7397.03	10939	6068.67	3290.03	6211.88
Lus10034524	1	1	2.05473	1.02354	1	1	1.01624	1.02546
Lus10014262	1	6.66667	1.02812	2.37627	1	15	1.01624	1.36346
Lus10008612	15.6667	142	4.79784	10.8087	43	177.667	11.8499	8.16551
Lus10024791	7.66667	3	4.10795	1.02354	43.3333	4.66667	7.1052	2.05603
Lus10025962	1	29	1.02812	4.0933	1	35.6667	1.35442	8.54817
Lus10024216	1	1	1.02812	1.02354	1	1	1.01624	1.02546
Lus10030680	1	13	1.37156	1.02354	1	9.66667	7.78495	1.02546
Lus10021098	3731.67	2694.67	2775.26	6110.69	3898	3019.33	1961.95	8231.04
Lus10029340	1	1	1.7113	1.70891	1	1	2.03078	1.02546
Lus10039443	3	37	11.9823	3.09128	4.66667	45.6667	21.3325	3.74602
Lus10001407	1	1	3.08101	1.69903	1.66667	1.33333	6.09404	3.07129
Lus10033145	1	1	1.02812	1.02354	1.33333	1	1.01624	1.02546
Lus10014519	1	26	1.02812	3.04822	1	30.6667	1.01624	2.72818
Lus10018016	16.6667	2	2.74127	1.02354	15	2.33333	6.09066	1.02546
Lus10002059	1	15	2.05288	6.1628	1.33333	11.3333	1.6926	10.6156
Lus10032168	1	238.333	1.02812	16.0267	1	180	2.70715	44.2062
Lus10018708	1	1.33333	1.02812	1.02354	1	2	1.01624	1.36346
Lus10004048	29.3333	534.333	21.2438	180.049	41.6667	594.667	12.2185	83.8628
Lus10042012	1	1	1.37122	1.36173	1.33333	1	1.01624	1.02546

## Sheet: jasmonic acid
	M−Fn−L	M−Fn−R	D−Fn−L	D−Fn−R	M−Ly−L	M−Ly−R	D−Ly−L	D−Ly−R
Lus10015666	585.667	985	448.317	1020.43	695.333	1080.33	277.118	1472.01
Lus10008202	56	7	2.0544	7.10375	184	36.3333	14.2239	38.9102
Lus10031505	85	28	386.876	15.6178	92.3333	29.3333	569.94	16.7556
Lus10038242	2.33333	5	3.76267	5.45679	1.33333	4.33333	6.76702	5.81993
Lus10039094	684.333	41.6667	3582.36	65.5559	883	46.3333	2551.55	90.9955
Lus10031809	104	135	154.193	252.98	85.6667	107	168.393	296.369
Lus10002545	1999.33	36	213.775	51.6174	3604.67	59	591.289	59.6217
Lus10031238	23.6667	104	24.3256	132.341	7.33333	190.333	33.8537	205.019
Lus10008041	1	1	1.02812	1.02354	1.33333	1	1.01624	1.02546
Lus10004915	348	233.667	715.201	345.883	307.667	240	883.519	339.113
Lus10031810	21.3333	1739.33	58.2571	2327.4	7.33333	3106.67	86.6727	5274.05
Lus10002547	7284.67	6495	2333.14	6235.63	7857.33	7074.33	2324.14	3494.02
Lus10001465	14.6667	34.6667	7.2014	20.7184	14.6667	33.3333	7.79172	22.1521
Lus10041646	186	243	85.3152	283.829	150.333	210	55.2133	242.973
Lus10013151	843	784.667	973.3	3620.75	883	914.333	2132.61	1865.67
Lus10015184	326.333	125.333	2765.31	676.806	360.667	247.667	4078.9	569.297
Lus10035232	2	1	7.88642	1.36084	1.33333	1	8.11805	1.02546
Lus10027379	1526.67	3497.67	392.826	1692.06	1637.67	4200	225.593	1173.59
Lus10031239	93.6667	662.667	150.079	779.623	59.3333	1038	235.938	1043.09
Lus10031236	154.667	71.6667	55.1879	90.7898	1483	51.3333	639.463	92.8503
Lus10025857	10	28.6667	21.2579	25.5357	10.3333	41	34.2004	22.832
Lus10031237	221	1326.67	327.923	1419.68	97	1587	383.226	2702.41
Lus10006429	76.3333	804.333	22.5999	1310.69	110	926.333	21.6741	1384.09
Lus10032087	88	10.3333	10.2701	6.10897	69	9	7.10351	11.9447
Lus10008113	497	408.333	302.595	1691.07	551	510	462.352	828.904
Lus10032739	1382.67	4886.67	402.868	3566.89	1638.33	3553	934.7	2095.85
Lus10031540	370.333	1.33333	15.7548	1.02354	967	1.66667	45.0374	1.02546
Lus10021019	1	1	2.0544	1.02354	1	1.33333	2.03417	1.02546
Lus10030032	1	1.66667	1.37122	5.82285	1	2.66667	1.01624	4.42075
Lus10035295	1	1	1.02812	1.02354	1	1	1.01624	1.02546
Lus10021015	1	1	1.02812	1.70979	1.33333	2.66667	2.70715	1.36983
Lus10035289	459	2049.33	6539.32	8675.28	576.667	2644.67	7364.95	10698.1
Lus10018791	1001	1019.33	2009.19	677.257	1218.33	938.667	3079.19	465.307
Lus10030033	379	663.333	6030.84	2429.14	175.667	802	3665.62	2946.53
Lus10030029	14.6667	1	2.39968	3.10205	8.33333	4.33333	1.01624	1.36983
Lus10015138	56	1.33333	3.76418	1.02354	135	1.33333	4.7447	2.05219
Lus10017571	461	980	407.755	728.011	577.667	955.333	861.074	511.149
Lus10033535	295.333	1128.33	286.487	1186.49	468	1210.33	507.339	949.29
Lus10001276	281.333	228.333	322.389	278.123	527	305.667	484.657	251.888
Lus10030737	6.66667	3	10.2752	3.41958	8	5	11.1769	5.47804
Lus10001275	8.66667	239.333	3.43016	87.3632	11	157.667	2.70884	59.7741
Lus10028663	417	892.667	1377.59	722.35	529.667	766.667	1845.03	839.118
Lus10009473	204.333	496.333	48.9752	509.408	223	877	60.9709	488.025
Lus10013218	718	540.333	2254.04	1057.31	768.667	648.333	1511.68	1403.39
Lus10000966	649.333	749.333	462.277	575.623	623.667	750.333	390.699	586.447
Lus10001274	250.667	277	59.6497	214.85	452.667	352.333	75.5736	128.3
Lus10031333	405	868.333	517.434	1260.81	384	721.333	846.739	1390.44
Lus10017991	1945.67	1140.67	783.397	1693.35	1986	1339.67	1552.13	1871.37
Lus10041986	1485	966	1426.3	1213.83	1557.67	1076	2187.71	1452.45
Lus10006392	240.333	280	79.8393	232.313	253.333	217.333	59.9851	258.546

## Sheet: indole-acetic acid
	M−Fn−L	M−Fn−R	D−Fn−L	D−Fn−R	M−Ly−L	M−Ly−R	D−Ly−L	D−Ly−R
Lus10029200	21.3333	20	44.1861	25.5717	44	13	96.5392	40.9191
Lus10009737	54.3333	36.6667	13.3648	120.866	67.3333	58	10.1725	217.494
Lus10018169	108	46.3333	271.746	75.5238	109.333	76	344.586	117.256
Lus10037601	1079	743.667	1767.14	722.941	1272.33	594.667	2246.77	645.919
Lus10022761	140	240.333	97.3345	255.237	146	196.333	78.2384	274.32
Lus10032963	511.333	243.667	724.055	245.7	577.333	219	643.933	227.353
Lus10021321	166.667	84.6667	149.114	94.7572	246	74	131.368	107.258
Lus10037602	1	1	1.02812	1.02354	1	1	1.01624	1.02546
Lus10030828	206.333	130.333	2063.48	516.062	198.667	99.6667	2729.44	422.339
Lus10015388	175.333	61.6667	434.36	103.774	176	65.6667	247.384	125.919
Lus10030659	168	151	2156.77	811.941	234.667	123	2841.57	621.716
Lus10006864	1582.33	1096.33	2798.1	1476.31	1813.67	940	3278.78	1319.09
Lus10010715	3	17.3333	44.8999	3.0581	5.66667	22.6667	80.5617	3.08533
Lus10016998	407.333	423	227.237	522.263	403	380	136.511	508.82
Lus10025668	146	180	326.479	126.034	156	169.667	339.554	108.421
Lus10026994	102.667	10.3333	29.8001	4.39653	94.6667	4	18.6457	1.02546
Lus10030685	292.333	360	519.23	485.959	257.333	299.333	629.656	529.385
Lus10010303	1	2.33333	1.7113	1.69991	1.33333	2	2.70884	1.70146
Lus10011261	355.667	265	351.348	585.516	222.667	190.333	479.718	666.901
Lus10018006	33.3333	188.333	8.57462	76.4936	53.6667	266.333	12.1915	64.4614
Lus10035160	1918.67	1355.33	1161.14	1622.37	1679.67	1280.33	1283.88	1619.56
Lus10020829	682.333	150.667	108.986	158.632	595.333	214	146.676	87.5264
Lus10042673	483	58	142.258	110.313	500.667	65	126.027	143.899
Lus10029633	200.667	195.333	340.308	154.725	196.333	152.333	228.011	160.035
Lus10016591	110	126	91.8958	67.833	73.3333	119.333	88.0389	49.1243
Lus10018007	38	342.333	12.0083	88.4661	49.6667	275.333	7.44507	120.485
Lus10034360	1640	864.333	1696.02	1035.13	1341.33	1134.33	1528.07	759.835
Lus10009685	45	218.333	8.90461	75.9755	58.6667	299	17.9389	91.6644
Lus10042003	22.6667	96.6667	8.91385	29.2386	36	147.667	8.463	21.4787
Lus10018426	1144	861	1424.37	1999.61	1006.33	939.667	2322.72	2676.71
Lus10009686	68.3333	243	7.54096	61.5698	56.3333	214	13.8722	122.921
Lus10042004	137	607.333	23.3074	138.27	136	598.667	30.8185	180.575
Lus10031562	638.667	720	706.379	632.793	662.333	674.667	587.312	601.159
Lus10000875	257	328	329.666	325.284	248	315.667	381.405	343.739
Lus10003767	7.33333	8.66667	5.1381	4.77954	5.66667	12	5.07442	6.14257
Lus10011262	1218.33	685.667	1004.2	755.18	1086.33	612.667	953.932	748.52
Lus10002281	1.33333	2	24.6789	2.38351	2	3	19.6484	1.36856
Lus10009599	264.667	394.667	311.542	364.524	286.333	348.667	240.858	422.103
Lus10006738	1109.67	894.667	1156.92	1157.86	1017.33	963.667	1683	1198.48
Lus10005235	230	251	439.711	346.295	227.667	224.333	414.315	413.894
Lus10031991	2725.33	1524.67	1267.12	2524.81	2201	1412.33	1535.6	2503.16
Lus10027985	5.66667	10.6667	2.73908	3.04999	4	7.66667	2.70715	3.41186
Lus10009054	58	506.667	7.53272	149.422	64.6667	492.333	18.9568	227.793
Lus10012680	1019	113	592.545	244.101	939.333	187.333	568.89	143.56
Lus10020193	69.3333	37.3333	34.2786	1.69903	148.667	28	29.1835	1.02546
Lus10001637	1	105.333	1.36971	18.404	1	96	1.01624	91.5066
Lus10020086	878	639.667	1912	829.597	825.333	626.667	3003.31	845.666
Lus10018425	289.667	166.667	394.772	145.868	280.333	158	490.126	250.565
Lus10000583	1	1	1.02812	1.02354	1	1	1.01624	1.02546
Lus10001429	1	84.3333	1.02812	35.8006	1	77	1.35442	85.9072
Lus10013422	8	18	8.22516	2.71092	13	25	16.253	9.18966
Lus10015115	381.333	478	848.58	350.798	415	459.333	785.012	320.197
Lus10011260	846.333	471.333	685.163	1126.13	540	464.667	843.408	1016.23
Lus10035161	730.333	648.667	1158.04	950.498	664.667	639	1217.79	974.924
Lus10005090	2365.33	1279.33	2675.88	1573.96	1970.67	1687.33	2652.78	943.823
Lus10036875	663	620.667	837.934	620.277	641.667	591.667	722.851	590.828
Lus10012189	44.6667	3	1.7113	1.02354	69	3	2.37235	1.02546
Lus10012185	2.33333	1	1.02812	1.02354	1.33333	1	1.01624	1.02546
Lus10009621	7.33333	1	1.02812	1.02354	7	1	1.6926	1.02546
Lus10010505	9782.67	2795	14336.6	6987.38	8952.67	2760	14508	7034.06
Lus10030263	12	1	3.08503	1.02354	15.3333	1	4.74977	1.02546
Lus10021435	2.66667	1	2.0544	1.02354	5	1	2.71222	1.02546
Lus10020882	125.667	115.333	65.8206	119.381	117	130.333	33.8723	110.624
Lus10037443	184.333	56	124.782	27.5729	419.333	74.6667	171.345	45.4062
Lus10033159	1	2	1.02812	1.02354	1	2	1.01624	1.02546
Lus10023701	1674	1399.33	5680.4	2468.48	1657	1583.67	6823.69	3032.23
Lus10032237	43	7.66667	2.74211	3.73358	41	8.33333	4.06495	6.85812
Lus10040236	5	8.66667	16.4407	6.4498	6.66667	10.3333	22.6869	28.788
Lus10030754	150.667	148.667	219.965	194.005	157.667	148	253.298	154.575
Lus10025115	10.3333	1	1.02812	1.02354	3.66667	1	1.01624	1.02546
Lus10041336	1	1	4.45659	1.02354	1.66667	1.33333	4.74131	1.02546
Lus10000915	1	30	1.02812	19.363	1	45.6667	1.01624	22.4927
Lus10028920	1.66667	1.33333	1.02812	2.03632	2	1.33333	1.01624	1.02546
Lus10010120	2.66667	52	1.71281	5.08631	9.66667	75	3.0504	5.45516
Lus10004399	42.6667	77	23.6475	63.3962	29.6667	78	44.7161	132.179
Lus10007564	3.33333	2	14.7309	1.69903	4.33333	2	39.2883	1.70782
Lus10002921	1	4.33333	1.37122	1.02354	1	5.66667	1.01624	1.02546
Lus10007067	1	1	1.02812	1.02354	1	1	1.01624	1.02546
Lus10012181	4.66667	1.33333	6.16671	1.02354	3.33333	2	16.248	1.02546
Lus10036832	470.667	1	15.0537	1.02354	801.667	1.33333	45.6985	1.02546
Lus10037328	253.667	2124.33	19.5389	521.188	367.667	2324.67	29.1124	286.424
Lus10039797	410.667	2	46.5798	1.36084	789.333	3.66667	112.44	2.05219
Lus10006227	243.333	233.667	269.721	241.582	246.667	219.667	307.189	243.503
Lus10005151	700.667	1528.67	322.762	843.755	880.333	1532.33	440.092	430.109
Lus10012350	2163.67	2137.67	2331.03	7669.99	3445	3317.67	3340.87	6475.34
Lus10034356	218.333	345.667	48.0016	233.615	149.333	334	20.3315	201.669
Lus10029615	1015.67	845.667	657.844	880.385	924.333	908.333	354.44	879.604
Lus10010714	29.6667	2.33333	7.5477	1.02354	32	3.33333	3.05379	1.02546
Lus10015879	657.667	234.667	509.177	392.189	505	232.667	555.718	506.726
Lus10007068	1	1	1.02812	1.02354	1	1	1.01624	1.02546
Lus10007481	227	367	54.1614	349.695	225.333	329	71.791	355.487
Lus10041921	2	1	3.08285	1.02354	1	1	5.75417	1.02546
Lus10011332	8	962.333	3.42529	1018	17.3333	954.333	5.08119	1083.99
Lus10029198	4.66667	1.33333	16.1082	1.69903	5.66667	2	8.47316	2.39019
Lus10026531	1	1	1.36971	1.02354	1.66667	1	2.03586	1.02546
Lus10003914	103.333	326.333	291.212	900.549	196.333	452.667	396.63	854.736
Lus10020943	103	110	137.065	84.2482	91.3333	109	118.543	57.4067
Lus10009219	1	126	1.02812	12.5095	1	56	1.69598	11.9025
Lus10016914	1	1	1.02812	1.36084	1	1	1.01624	1.02546
Lus10010566	1.33333	1	1.02812	1.36084	2	1	1.01624	2.40039
Lus10007059	1	1	1.02812	1.02354	1	1	1.01624	1.02546
Lus10019195	410	1.33333	9.58191	1.02354	702.667	1.33333	56.194	1.02546
Lus10033161	3.33333	46.6667	10.97	2.04709	3	46.6667	12.2016	4.78553
Lus10038193	12.3333	1	1.02812	1.02354	12	1	1.01624	1.02546
Lus10034507	5.66667	59.6667	15.7639	4.80284	6	31.3333	15.5699	3.05345
Lus10005094	132.333	270.667	44.5636	133.323	111.333	265.333	31.8568	98.5161
Lus10012183	1	9.66667	1.7113	1.69991	1	11.3333	1.01624	9.87718
Lus10039020	51.3333	8	23.6688	9.53667	57.6667	7.66667	15.9284	23.2974
Lus10005781	345	177.667	494.164	179.194	337.667	131.333	550.116	272.816
Lus10018510	2.33333	65	1.02812	3.04999	1.33333	51.6667	1.01624	4.7689
Lus10017018	2.33333	1	9.5915	2.38439	3	2.66667	13.5493	3.08659
Lus10013503	324.667	652.333	376.267	443.534	312	678.333	360.647	410.901
Lus10037408	54.6667	66.6667	63.0453	105.033	48	74.6667	46.4561	125.549
Lus10009624	10.6667	5	8.56657	5.14825	9.33333	3.33333	12.2033	4.10953
Lus10010713	18.3333	1	14.4009	1.02354	22.3333	1	3.72508	1.02546
Lus10028957	209	234.333	50.3982	210.024	203.333	235.333	52.824	222.148
Lus10032949	405.667	1176.67	1260.33	2733.06	517	1318	1137.52	3187.11
Lus10012426	19	69.3333	41.4666	23.1326	28	53	126.659	41.6272
Lus10025879	13.6667	56.6667	31.8463	3.7237	26	78.6667	24.0447	8.19481
Lus10034606	168.333	126	145.63	124.915	147.667	143.333	134.147	124.305
Lus10007563	1	9	1.02812	3.39982	1	6	2.03078	2.72566
Lus10037144	178.667	60	164.846	20.8216	170	67	156.484	33.8251
Lus10020440	2.66667	1	1.7113	1.02354	1.66667	1	1.6926	1.02546
Lus10017105	182	123	132.981	106.465	168	143.667	108.736	94.3769
Lus10003039	466	724.667	484.119	622.889	476	693.333	592.52	596.325
Lus10028466	1	1.66667	1.71499	1.02354	1.33333	1.66667	3.04702	1.36983
Lus10009627	12.3333	5	3.08806	5.10608	15.3333	5.33333	2.70884	6.82751
Lus10036785	307.333	230	273.781	189.695	305	252	294.252	198.9
Lus10025909	6.33333	7	6.17025	6.47045	9	7.66667	1.35611	21.5463
Lus10038192	18.3333	1	5.13204	1.37161	12.3333	1	8.13159	1.36983
Lus10030295	10.6667	23.6667	20.2027	65.1389	13.6667	28	13.8993	75.8843
Lus10027753	2	2	42.4502	4.08253	3.33333	3	71.7724	2.73965
Lus10042374	22	13.6667	7.88424	17.0979	25.6667	5.66667	8.14005	11.9599
Lus10010498	1.66667	32	38.0381	61.635	2.66667	37	37.6042	52.2297
Lus10002653	931.667	527.333	910.073	337.241	909	505.333	815.991	236.227
Lus10012613	1	1	1.02812	1.02354	1	1	1.01624	1.02546
Lus10023674	2371.67	2174.33	3461.66	1858.68	2252.67	1926	2974.56	1657.27
Lus10012190	247.333	130.667	228.239	100.876	266	135	260.813	228.828
Lus10015890	120.333	152	153.52	118.221	119.667	141	276.873	104.153
Lus10004337	1.66667	2.33333	1.02812	1.69814	1	2	3.39028	1.02546
Lus10013819	8.66667	1.33333	14.4009	1.02354	11.3333	1.33333	27.4486	1.02546
Lus10026521	2.33333	5.33333	9.59872	15.6285	2.33333	5	8.463	17.4787
Lus10021130	1.33333	3	1.02812	1.37161	1	5	1.01624	1.02546
Lus10021790	142	134	73.6821	100.157	132	150.333	54.5268	103.207
Lus10009286	1634.67	503.333	4586.42	928.551	1586	560.333	5301.06	1266.97
Lus10017564	24	19.6667	80.5347	35.0919	28	24.3333	99.2531	43.7058
Lus10026792	94.6667	68.3333	56.5457	51.8742	106.333	66.3333	32.8747	60.1491
Lus10036089	125	98.3333	90.171	57.2161	126.667	102.667	83.3721	58.8442
Lus10034511	4	11.6667	1.02812	2.37274	2.33333	11	3.04702	3.40418
Lus10008999	14.3333	1	2.40186	1.36173	11.6667	1	4.73962	1.02546
Lus10020430	1	1	1.02812	1.02354	1	1	1.01624	1.02546
Lus10001162	19.6667	92.6667	11.2991	8.8019	59.6667	195.667	11.8533	10.8797
Lus10039382	775.667	1222.33	2825.95	3591.31	683.667	1408	3418.78	3902.01
Lus10017171	509	353.667	1028.11	344.47	498.333	395	885.433	318.718
Lus10014804	47.6667	16	14.0543	6.10262	35	14.3333	38.6356	4.77527
Lus10035540	3.33333	9.33333	8.55866	22.1216	3.66667	10.3333	11.1702	14.0262
Lus10008995	20	1	9.94066	1.02354	7.33333	1	10.8489	1.02546
Lus10041181	122	181	114.409	116.889	297.667	148	152.402	134.907
Lus10026294	1	4.33333	1.02812	1.69814	1	3	1.01624	1.36346
Lus10007561	1	1	1.02812	1.02354	1	1	1.01624	1.02546
Lus10021825	6	8	6.16301	5.79232	7.66667	5.33333	7.79341	16.0147
Lus10006398	1842.33	3539.33	1928.28	9077.92	2240	4185	2095.51	7741.48
Lus10016129	9.33333	1	3.08621	1.02354	12	1	1.69429	1.02546
Lus10026296	6.66667	22	2.05288	12.2997	2	14.3333	1.35442	13.6768
Lus10021553	2.66667	10.3333	2.39632	4.76966	5	9.66667	4.05987	17.4713
Lus10038225	6	10.6667	19.1873	1.36173	8.33333	7.33333	39.2798	1.36346
Lus10026600	44	255.333	4280.77	404.217	40	336.333	6364.5	372.204
Lus10009000	12.3333	1	1.71432	1.02354	7.66667	1	4.73793	1.36983
Lus10026532	8.66667	10.6667	12.346	9.53932	9.66667	10.6667	7.11704	13.3054
Lus10015558	348.333	177	143.616	142.689	344.333	206	130.105	153.811
Lus10010391	17.6667	200.333	569.212	413.07	26.3333	186.333	862.197	393.856
Lus10029239	4.33333	65.6667	2.73757	13.5555	5	77	3.39197	8.83257
Lus10038224	12	16	45.2042	1.02354	27	32.6667	63.3026	2.03946
Lus10029985	59	99.3333	25.0236	54.8203	73.3333	91.6667	17.2659	69.3515
Lus10021436	5.66667	1	1.37156	1.02354	12	1	3.0521	1.02546
Lus10035323	54.6667	61.6667	29.4827	44.0276	54.6667	60.6667	24.7346	49.5207
Lus10026624	88	138.333	40.4516	90.1599	82	121.667	38.617	89.2088
Lus10025878	14	17	32.1972	13.9644	33	29.6667	32.1679	8.54296
Lus10011191	1898.67	21113	19745.6	57203.1	2118.33	20128	37800.6	59618.4
Lus10026685	9	2.33333	4.45693	2.38527	12.6667	2.66667	4.73624	1.36346
Lus10010654	372.333	317.667	590.172	330.797	440	369.667	466.116	333.592
Lus10031790	1.33333	33.6667	1.71466	47.3101	5	37.3333	2.71053	30.361
Lus10014869	5.66667	16	273.475	19.5218	7	20.3333	710.419	15.0363
Lus10033494	240.667	188.667	98.0545	113.95	214.667	174.667	49.1582	117.997
Lus10007553	61.6667	10	3.08319	1.36084	48.6667	10	6.09742	1.36346
Lus10025911	26.3333	1.33333	3.76536	1.37161	20	1	2.03078	1.02546
Lus10013612	415.667	196.667	469.25	307.59	465.333	272.333	403.546	311.078
Lus10037475	159.667	177.667	927.797	482.886	344.333	228	574.626	420.678
Lus10014444	56	100.333	3.07949	35.0911	106.667	193	4.06495	52.1711
Lus10025631	40.3333	74.6667	12.3444	27.9273	42.6667	75.3333	9.83096	28.6684
Lus10041184	540.667	311.333	232.672	289.455	667.333	305.333	173.78	258.057
Lus10037437	430.667	402.667	261.168	354.917	480.333	391.333	348.395	218.181
Lus10028253	3.33333	7.33333	13.3691	5.42714	5.33333	4.66667	13.5459	6.82751
Lus10001180	193	445.667	215.278	306.1	188.333	488.333	183.312	370.244
Lus10042377	1	1	1.02812	1.02354	1	1	2.03247	1.02546
Lus10037830	267.667	225	288.222	184.53	271.667	220	195.537	167.627
Lus10037990	1	1	1.02812	1.02354	1	1.33333	1.01624	1.02546
Lus10009620	4	1	2.05288	1.02354	5.66667	1	1.35442	1.02546
Lus10003140	2.66667	1512	3.0837	1575	5.33333	1717.67	6.78225	2305.18
Lus10019196	250.333	1	18.4696	1.02354	441	1.33333	48.3938	1.02546
Lus10006624	596	1638.67	3578.7	2425.38	648	1543.67	5506.07	2487.95
Lus10025910	9.33333	1.33333	1.71314	1.70979	5	1	1.6926	1.02546
Lus10020441	1	1	1.02812	1.02354	1	1	1.01624	1.02546
Lus10037302	1	4.33333	4.11131	2.38615	1	4.33333	5.0778	6.43344
Lus10003598	79	161.667	7.87985	315.257	60.6667	144.333	47.4064	224.55
Lus10020432	1	1	1.02812	1.02354	1	1	1.01624	1.02546
Lus10012732	1067.67	344.667	2038.56	281.987	1075.33	343.667	1943.65	198.147
Lus10007975	334.667	413.667	578.101	331.905	331	420.333	543.378	318.971
Lus10012432	1.66667	2.66667	1.02812	1.36084	2	2	1.01624	1.36346
Lus10033418	4	5274	119.183	9653.7	7.66667	3967	138.565	9245.1
Lus10001398	8.33333	2	48.6623	3.06075	8.33333	3.66667	59.2952	6.50608
Lus10013234	117.333	126	86.0445	139.551	134.667	133	93.8049	101.804
Lus10015917	1	1	1.02812	1.02354	1	1	1.01624	1.02546
Lus10008992	26.3333	1	1.7113	1.02354	27.6667	1.33333	2.03586	1.02546
Lus10027317	59.6667	26	67.1564	25.2845	43.3333	20.3333	62.0091	39.3516
Lus10009623	8.66667	1	1.36971	1.02354	7.33333	1.33333	3.0504	1.02546
Lus10023969	2.33333	1	1.02812	1.02354	1.66667	1	1.01624	1.02546
Lus10031754	116.333	223.333	283.395	212.394	93.3333	169	211.156	256.362
Lus10038191	7.33333	1	1.02812	1.36173	6.33333	1.33333	1.35442	1.36983
Lus10036833	211.333	40.3333	18.4948	42.5565	335.667	36.6667	16.5929	76.5898
Lus10013887	122.667	1137	992.989	1596.32	130	1312.67	954.511	1123.83
Lus10021119	227.333	346.667	1113.18	1324.6	210.667	412.667	1229.06	1166.96
Lus10008996	14	1	1.02812	1.02354	9.33333	1	4.06157	1.02546
Lus10018269	1	1	1.02812	1.02354	1	1	1.6926	1.02546
Lus10008994	3.66667	1	1.02812	1.02354	3.66667	1	1.01624	1.02546
Lus10032603	46.6667	84.3333	48.3105	27.895	50.6667	94.3333	49.4727	31.6633
Lus10020439	30	25	19.5407	16.7472	35.3333	19.6667	23.7116	22.8715
Lus10001734	18.3333	5.33333	8.22516	2.03721	21.6667	6	13.8858	2.72182
Lus10021557	449	208	323.833	181.869	493	232	326.185	163.653
Lus10001736	11.3333	44.3333	6.50781	4.08253	27.3333	83	8.80965	5.10438
Lus10018765	316.333	29.3333	58.9245	5.43261	347.667	32	133.12	4.08654
Lus10007560	3.66667	8.33333	1.02812	14.6329	2	7	1.01624	24.2439
Lus10039723	16.6667	216	1.02812	24.3425	12	224.667	1.35442	10.8631
Lus10028080	24.6667	61.6667	3.76972	16.6611	40.3333	87	4.74808	14.2877
Lus10034883	1	1767	1.02812	2890.56	1.66667	1384.33	3.38351	1853.27
Lus10035716	1	10	1.71466	1.36084	1	8.33333	3.3852	2.39529
Lus10007069	1	1	1.02812	1.02354	1	1	1.01624	1.02546
Lus10027690	1	1	1.02812	1.02354	1	1	1.01624	1.02546
Lus10024326	2.66667	6.66667	1.02812	1.36084	3.66667	4.66667	2.03417	1.02546
Lus10007562	1	4	1.02812	1.36173	1	3.66667	1.01624	1.36346
Lus10040643	1	1.33333	2.40186	1.37161	1	1.66667	1.01624	11.3158
Lus10009276	55	108	80.899	53.0923	64	104.333	292.781	49.8359
Lus10013460	135.667	227.667	323.428	290.038	126.667	255.333	413.02	282.764
Lus10042376	1	1	1.02812	1.02354	1	1	1.01624	1.02546
Lus10025114	1	1	1.02812	1.02354	1	1	1.6926	1.02546
Lus10012625	3.33333	46.3333	6.16604	10.1825	5.66667	96.6667	2.71053	9.50604
Lus10016130	4.66667	1	3.42562	1.02354	8.33333	1	4.06326	1.02546
Lus10015418	1213	4791	3259.64	18465.3	1692.67	5615	4594.26	26200.5
Lus10017179	1.33333	4	1.37156	2.03721	1.33333	3.66667	3.0504	1.36346
Lus10034570	4	8.66667	1.7113	3.05899	7.33333	9.33333	12.8543	7.83514
Lus10020431	1	1	1.02812	1.02354	1	1	1.01624	1.36856
Lus10009001	12	1.33333	1.37156	1.37161	9.66667	1.66667	1.6926	1.71293
Lus10018565	30.6667	2.33333	16.4469	1.69903	45.6667	3.33333	26.4256	1.36983
Lus10004729	86.6667	129	41.8017	93.7326	100.333	122	43.6864	86.7218
Lus10001397	38.6667	28	56.2127	48.4654	33	22.6667	25.0678	54.0753
Lus10010110	92	23.3333	85.3771	42.2345	77	26	81.3277	42.0924
Lus10008845	200	141.667	592.566	199.163	256.667	144.333	688.103	223.597
Lus10007057	1	1	1.02812	1.02354	1	1	1.01624	1.02546
Lus10007792	249.333	268.333	135.367	183.432	229	221.333	132.429	182.344
Lus10001985	29	30.3333	22.2739	50.8461	26.3333	34.6667	32.5247	65.3899
Lus10041303	240	75.6667	770.988	135.126	159	78.6667	517.446	162.174
Lus10006105	52.3333	8	38.6667	86.859	102.667	15.6667	49.4524	67.1036
Lus10039962	1	1.66667	1.02812	1.02354	1	1.33333	1.01624	2.05476
Lus10024600	166	279.667	187.38	272.822	107.667	295.667	226.222	593.747
Lus10002274	13	15	1.37122	6.10897	16	20	4.39806	5.46405
Lus10023948	45.3333	26.6667	8.21944	13.9528	74.3333	34.3333	13.534	15.359
Lus10023011	41.6667	33.3333	25.3789	44.584	44	24.3333	18.9737	61.5494
Lus10013997	2076	4709.33	1884.51	15079.7	1657	3732.67	2118.82	16991.1
Lus10021341	8.66667	2.33333	35.3053	1.02354	4.66667	1.33333	39.6231	1.02546
Lus10009628	17.3333	1	2.73606	1.02354	11	1	1.69429	1.02546
Lus10008719	72	115.333	88.0794	50.0388	70	102	109.048	57.7359
Lus10013808	2.33333	2.33333	4.79936	7.45905	1.66667	1.66667	8.79949	8.1744
Lus10041185	204.333	658.333	102.16	375.019	181.333	638.667	47.4317	311.716
Lus10013181	16.6667	75.6667	1.71499	38.983	27	56.6667	1.35442	38.6081
Lus10041272	1377.67	1883.33	1203.33	2612.06	1673.33	2048.67	777.768	2412.69
Lus10032173	8.66667	13.6667	4.79869	5.7842	10.6667	8.33333	7.79679	8.51498
Lus10011751	1743.67	2069.67	2731.81	1612.93	1645.33	1800.67	2470.89	1431.5
Lus10042379	5.33333	4.33333	1.02812	2.37362	5	3.33333	1.6926	2.73586
Lus10007066	1	1	1.02812	1.02354	1	1	1.01624	1.02546
Lus10012305	126	162.667	175.147	101.067	121.667	137.333	188.706	156.418
Lus10026297	11.3333	7.33333	5.47699	7.1334	6.66667	6.33333	4.06156	6.12095
Lus10015318	7951.33	937.667	5483.31	3839.87	19036.3	1602.33	4914.89	6925.52
Lus10030437	53.6667	40.6667	21.2423	15.9748	51.6667	42.6667	36.5778	20.7835
Lus10018484	3231.33	15048.7	21515.1	43916.5	4299.33	14328	35170.9	43485.3
Lus10007060	1	1	1.37156	1.02354	1	1	1.35442	1.02546
Lus10009450	110.333	157.333	112.075	68.0598	108.333	166	136.514	55.4031
Lus10017190	103.333	383	1342.85	1235.38	110.667	442.667	1438.21	1196.27
Lus10008991	2.33333	1	1.37156	1.02354	2.33333	1	1.35611	1.02546
Lus10003715	161.333	209	103.451	214.069	184.667	230	156.137	218.87
Lus10012270	93.6667	107	129.878	147.609	91.3333	110.667	182.226	144.651
Lus10023012	114	1.33333	176.524	1.02354	124	1.33333	225.618	1.02546
Lus10034651	579.333	892.667	552.361	530.996	620.667	948.667	506.221	411.14
Lus10035749	454	1714.33	51.053	502.658	625.333	1995	57.2339	257.287
Lus10012182	1	5.33333	1.37156	1.37161	1	2.66667	2.70884	2.05092
Lus10006820	1030.33	416	832.96	458.405	842.333	431.667	870.574	970.44
Lus10021717	422.667	363.333	452.746	259.407	427.667	391.667	601.638	209.796
Lus10004014	58	1	13.0164	1.02354	71	1.33333	34.5707	1.02546
Lus10026977	28.3333	35.3333	7.88793	22.9361	38.3333	35	5.75417	33.4653
Lus10025877	166.667	228.667	208.889	109.083	254.667	248.333	162.916	92.0941
Lus10012184	1	1.33333	1.02812	1.02354	1	1	1.01624	1.02546
Lus10042378	1	8	1.02812	2.71004	1.33333	6	1.35442	3.08528
Lus10001545	275.333	340.333	461.382	189.964	179	224	356.672	127.404
Lus10034038	10474.7	24864.7	12603.5	12271	9891.67	16096.7	11558.2	12294.8
Lus10033348	1.66667	1.66667	1.71466	2.7118	1	4	2.03247	4.76128
Lus10007290	4.33333	93.3333	3.42965	10.5099	11.3333	125	7.11028	14.9778
Lus10034888	1	1	1.02812	1.02354	1.33333	1	1.01624	1.02546
Lus10016917	1	1	2.73975	1.02354	1	1.33333	3.04871	1.02546
Lus10030093	1	7	1.02812	15.1002	1	6	1.01624	31.8505
Lus10024322	2.33333	16.3333	2.05288	4.43148	2.66667	16.3333	4.40313	4.44621
Lus10023970	1.66667	1	1.02812	1.02354	1.66667	1	1.35442	1.02546
Lus10007552	4.66667	3.33333	4.80305	1.69903	4	2.33333	3.39028	2.04966
Lus10016080	2.66667	233	4.11685	187.764	5.66667	257.333	5.0778	111.904
Lus10004629	114.333	10	5.82194	6.11885	208.667	6.33333	11.1735	5.11074

## Sheet: salicylic acid
	M−Fn−L	M−Fn−R	D−Fn−L	D−Fn−R	M−Ly−L	M−Ly−R	D−Ly−L	D−Ly−R
Lus10024671	1	2.33333	1.02812	1.36084	1	3.66667	1.01624	1.02546
Lus10036550	3.66667	1498	25.6496	2959.47	6.33333	2335	7.11874	7603.2
Lus10032569	1.33333	12.6667	1.02812	18.4012	2	22	1.35611	14.6447
Lus10036548	473.333	994	171.028	1159.8	433.667	1086.67	148.467	856.205
Lus10021802	1	1.33333	2.40001	1.69814	1	1	6.7704	1.36346
Lus10036547	3.33333	2.33333	5.82833	2.71445	4	2	10.1522	2.39787
Lus10028330	1	1	1.02812	1.02354	1	1	1.01624	1.02546
Lus10032299	1	1	1.02812	1.02354	1	1	1.01624	1.36856
Lus10028500	5	5.33333	4.79818	4.44401	1.66667	4.33333	3.39028	3.42075
Lus10041776	185.667	199.333	184.432	239.611	166.333	183.667	112.537	199.837
Lus10009675	61	1.33333	425.593	1.37161	54	1.33333	434.916	2.39403
Lus10025993	42.6667	2	25.6883	1.69814	69.3333	1.33333	63.3398	1.02546
Lus10024271	77.6667	1	264.06	1.36173	126.667	1.66667	173.77	1.02546
Lus10041380	59.6667	18	14.7209	2.37539	62.6667	19	13.8959	3.77027
Lus10043177	1	17.3333	1.37156	21.1698	1.33333	13.6667	1.35442	10.5506
Lus10017826	2.66667	1	4.45828	1.02354	1.33333	1	6.43899	1.02546
