# Supplementary material for: Evaluation of Differentially Expressed Genes in Leaves vs. Roots Subjected to Drought Stress in Flax (Linum usitatissimum L.)
Source: Int J Mol Sci. 2023 Jul 27;24(15):12019. doi: 10.3390/ijms241512019 (PMC10419004; doi:10.3390/ijms241512019)
Supplement: Supplementary file 1 [file ijms-24-12019-s001.zip › Supplementary Table S7.xlsx]

## Sheet: primers
	Fprimer	Rprimer
Lus10004990	ACAATGGCAATTCTCAGGAGTA	CCATTTTTGTGGTGGAGACAAT
Lus10041595	GTAGCAGTAATATTAGCGCTGC	AATAATCCTGGATTTTGCGAGC
Lus10037448	CAAGAAAGCCAAGGTGAACTTC	GTTTCTGAGCTTTAGCCTTTCC
Lus10013186	CAAAGGCTAAAGCTCAGAAACC	TTCATCGATGGTTTCTCTTCCA
Lus10037487	AATCCGGAGCTTCTTCCTTTTC	GTTTCCTCAAATCCAAATCCCC
Lus10032499	GGAAGGAGGATTTGATCACTGA	GCTTTCTTAACAACCTCATCCG
Lus10040165	GATCCAGGGCACTGTTGAATTT	CGATCTCTTCGTGGTAATCCTC
Lus10005149	GGAGACGAGTTCAACTACATGA	ATTCCTCTTCATTTTCGTCCCT
Lus10034316	GCAAGGATGAAGGTTTTGACTT	AAACTCGTCGATTATGTTGCTG
Lus10041456	GGGAGGATGTATGACGATTTCT	GTTGTTGATGATGATCGTCGAG
